# Supplementary material for: Transcriptome Analysis of NPFR Neurons Reveals a Connection Between Proteome Diversity and Social Behavior
Source: Front Behav Neurosci. 2021 Mar 31;15:628662. doi: 10.3389/fnbeh.2021.628662 (PMC8044454; doi:10.3389/fnbeh.2021.628662)
Supplement: Supplementary file 5 [file Table_1.xlsx]

## Sheet: Sheet1
	1				2				3				4				5				6				7				8				9
Elav vs :
	NPFR_ELAV		log2FoldChange		NPF_ELAV		log2FoldChange		Tdc2_ELAV		log2FoldChange		TRH_ELAV		log2FoldChange		TH__ELAV		log2FoldChange		Crz-ELAV		log2FoldChange		DH44_ELAV		log2FoldChange		FRU_ELAV		log2FoldChange		OK107_ELAV		log2FoldChange
	FBgn0027843	CAH2	-2.92062		FBgn0085813	18SrRNA-Psi:CR41602	2.06079		FBgn0041707	7B2	2.91783		FBgn0267408	AOX1	2.89855		FBgn0014454	Acp1	3.23984		FBgn0260793	2mit	-1.13053		FBgn0085813	18SrRNA-Psi:CR41602	1.68078		FBgn0032536	Ance-3	-3.8948		FBgn0014454	Acp1	2.11497
	FBgn0039084	CG10175	2.22885		FBgn0004364	18w	1.40415		FBgn0030343	ATP7	1.98438		FBgn0038349	AOX3	2.57195		FBgn0027562	CG10345	2.4006		FBgn0004168	5-HT1A	2.46956		FBgn0004364	18w	1.97099		FBgn0035696	Best2	-3.13689		FBgn0266429	AstA-R1	-1.80703
	FBgn0031732	CG11149	-18.7062		FBgn0085753	28SrRNA-Psi:CR40596	2.72409		FBgn0000044	Act57B	2.48384		FBgn0000044	Act57B	2.66225		FBgn0032707	CG10348	2.77699		FBgn0263116	5-HT1B	2.29279		FBgn0250848	26-29-p	3.58789		FBgn0038147	CCHa2	-3.25876		FBgn0039131	CG12268	3.5347
	FBgn0029810	CG12239	4.79807		FBgn0267508	28SrRNA-Psi:CR45848	2.7938		FBgn0000046	Act87E	2.73851		FBgn0000046	Act87E	2.59004		FBgn0034253	CG10936	2.54762		FBgn0052626	AMPdeam	2.5057		FBgn0085753	28SrRNA-Psi:CR40596	3.22658		FBgn0039084	CG10175	-2.23141		FBgn0035544	CG15021	2.67226
	FBgn0033558	CG12344	2.1748		FBgn0259178	5PtaseI	-1.65109		FBgn0012036	Aldh	1.80532		FBgn0035612	CG10625	2.97728		FBgn0034693	CG11073	2.27418		FBgn0034606	ASPP	1.71419		FBgn0267508	28SrRNA-Psi:CR45848	3.15156		FBgn0027562	CG10345	-2.95677		FBgn0039804	CG15544	2.26479
	FBgn0032023	CG14274	2.04993		FBgn0033246	ACC	2.20157		FBgn0037533	CD98hc	2.06032		FBgn0034296	CG10912	6.08446		FBgn0031732	CG11149	-18.7646		FBgn0037989	ATP8B	-1.12417		FBgn0267513	28SrRNA-Psi:CR45853	2.69576		FBgn0032707	CG10348	-2.72937		FBgn0032835	CG16772	3.0602
	FBgn0039647	CG14509	1.57365		FBgn0053138	AGBE	2.47025		FBgn0034693	CG11073	3.23619		FBgn0040637	CG11458	2.71777		FBgn0037796	CG12814	1.72679		FBgn0010217	ATPsyn-b	1.55203		FBgn0004168	5-HT1A	-1.69634		FBgn0039324	CG10553	-4.58327		FBgn0034974	CG16786	3.14367
	FBgn0035797	CG14837	3.74179		FBgn0267408	AOX1	4.0842		FBgn0031732	CG11149	-16.586		FBgn0029810	CG12239	3.70489		FBgn0030829	CG12998	4.10519		FBgn0024150	Ac78C	-1.89354		FBgn0041707	7B2	1.74954		FBgn0034253	CG10936	-1.95749		FBgn0050158	CG30158	1.80196
	FBgn0050272	CG30272	-25.4189		FBgn0038349	AOX3	3.62282		FBgn0035488	CG11593	1.88592		FBgn0035321	CG1275	1.95456		FBgn0030798	CG13003	2.18919		FBgn0000044	Act57B	2.0887		FBgn0031791	AANATL2	-3.43993		FBgn0037290	CG1124	-3.54025		FBgn0050197	CG30197	3.56
	FBgn0028490	CG31705	2.14013		FBgn0029879	APC7	-5.46888		FBgn0037941	CG12594	2.76722		FBgn0036595	CG13046	18.2725		FBgn0036595	CG13046	17.5435		FBgn0000046	Act87E	2.36078		FBgn0033246	ACC	2.02777		FBgn0030065	CG12075	-2.36991		FBgn0028899	CG31817	-2.30473
	FBgn0053093	CG33093	-4.92929		FBgn0010217	ATPsyn-beta	1.53506		FBgn0035321	CG1275	5.36419		FBgn0035523	CG1311	2.05602		FBgn0036583	CG13055	-3.02115		FBgn0000047	Act88F	4.00418		FBgn0053138	AGBE	2.48762		FBgn0037387	CG1213	-3.04658		FBgn0250833	CG34461	6.73293
	FBgn0085218	CG34189	-1.27865		FBgn0020235	ATPsyn-gamma	1.77204		FBgn0032582	CG13258	-18.1493		FBgn0033851	CG13332	1.97251		FBgn0033668	CG13188	2.61777		FBgn0032136	Apoltp	1.5146		FBgn0023169	AMPKalpha	1.49579		FBgn0029810	CG12239	4.52143		FBgn0259223	CG42323	6.15422
	FBgn0085382	CG34353	1.63306		FBgn0039946	ATbp	-6.92375		FBgn0033851	CG13332	3.93929		FBgn0034662	CG13492	4.80695		FBgn0039161	CG13606	3.60058		FBgn0266429	AstA-R1	-2.18392		FBgn0267408	AOX1	3.03556		FBgn0037213	CG12581	-2.36333		FBgn0031926	CG6739	2.765
	FBgn0031571	CG3921	1.92028		FBgn0028962	Aats-ala-m	-3.33782		FBgn0029643	CG14420	-6.90015		FBgn0034723	CG13506	2.00554		FBgn0035844	CG13676	2.16452		FBgn0032336	AstC	3.97707		FBgn0038349	AOX3	4.12793		FBgn0030798	CG13003	-3.3458		FBgn0031942	CG7203	2.51883
	FBgn0033257	CG8713	-4.35882		FBgn0027088	Aats-gly	-2.52138		FBgn0035544	CG15021	2.46249		FBgn0036717	CG13731	3.92184		FBgn0035553	CG13722	2.92949		FBgn0036790	AstC-R1	4.42464		FBgn0010217	ATPsyn-b	1.97348		FBgn0040370	CG13375	1.67196		FBgn0033308	CG8736	2.91809
	FBgn0032068	CG9466	20.116		FBgn0027087	Aats-his	-2.06771		FBgn0033090	CG15909	4.25603		FBgn0038451	CG14893	8.16563		FBgn0037836	CG14692	-3.24028		FBgn0013751	Awh	4.91289		FBgn0010217	ATPsyn-beta	1.58412		FBgn0039151	CG13607	-3.05343		FBgn0032068	CG9466	16.8883
	FBgn0045761	CHKov1	2.18317		FBgn0023416	Ac3	-1.4061		FBgn0028544	CG16884	2.26885		FBgn0032109	CG17005	3.65222		FBgn0035544	CG15021	2.95428		FBgn0031568	CG10019	-2.02713		FBgn0016120	ATPsyn-d	1.54764		FBgn0036935	CG14186	1.95158		FBgn0039805	Cpr100A	3.6356
	FBgn0263744	CR43669	5.75164		FBgn0028484	Ack	1.69189		FBgn0036923	CG17732	-20.1368		FBgn0038449	CG17562	18.7503		FBgn0034391	CG15080	3.06075		FBgn0034420	CG10737	-1.0312		FBgn0020235	ATPsyn-gamma	2.50893		FBgn0032022	CG14275	-2.62756		FBgn0033603	Cpr47Ef	7.19984
	FBgn0263745	CR43670	2.38414		FBgn0010100	Acon	2.35661		FBgn0029994	CG2254	2.23535		FBgn0033484	CG2269	2.41337		FBgn0034394	CG15096	1.91115		FBgn0263353	CG11000	2.08252		FBgn0039946	ATbp	-5.24939		FBgn0034394	CG15096	-3.18637		FBgn0035281	Cpr62Bc	2.93552
	FBgn0263870	CR43717	-4.21409		FBgn0014454	Acp1	3.5529		FBgn0039792	CG2267	-17.0004		FBgn0031645	CG3036	1.40765		FBgn0029864	CG15894	-1.14877		FBgn0031855	CG11221	3.13904		FBgn0023416	Ac3	-1.12876		FBgn0037448	CG15186	-2.6798		FBgn0035510	Cpr64Aa	4.1103
	FBgn0266168	CR44874	-16.348		FBgn0267327	Acp33A	-3.52625		FBgn0033484	CG2269	5.05811		FBgn0051708	CG31708	-1.35714		FBgn0032835	CG16772	2.77712		FBgn0039939	CG11231	3.6611		FBgn0016122	Acer	1.95354		FBgn0033442	CG1690	-2.70707		FBgn0035512	Cpr64Ac	4.65466
	FBgn0267012	CR45456	2.60077		FBgn0020765	Acp65Aa	5.77935		FBgn0050271	CG30271	-6.05119		FBgn0083956	CG34120	1.87979		FBgn0034974	CG16786	2.98452		FBgn0039816	CG11317	-1.37091		FBgn0010100	Acon	2.24007		FBgn0031168	CG1722	-1.91978		FBgn0036881	Cpr76Bd	3.87073
	FBgn0053517	Dop2R	1.68732		FBgn0000044	Act57B	4.67075		FBgn0283427	CG3523	1.59817		FBgn0283427	CG3523	1.37896		FBgn0028544	CG16884	2.94338		FBgn0035546	CG11345	2.7652		FBgn0034628	Acox57D-p	3.02702		FBgn0035880	CG17352	-3.17049		FBgn0027790	GV1	3.29123
	FBgn0261283	HLH106	1.15199		FBgn0000046	Act87E	4.57171		FBgn0031285	CG3662	1.76517		FBgn0058191	CG40191	-2.10747		FBgn0032538	CG16885	2.65819		FBgn0037454	CG1137	-1.69044		FBgn0014454	Acp1	3.29666		FBgn0033936	CG17386	-3.0098		FBgn0031902	Wnt6	3.94141
	FBgn0001224	Hsp23	-4.42507		FBgn0024913	Actbeta	-1.84734		FBgn0266566	CG45105	-5.18491		FBgn0264489	CG43897	1.94205		FBgn0028938	CG16886	2.396		FBgn0031214	CG11374	-1.30228		FBgn0267327	Acp33A	-4.03413		FBgn0038449	CG17562	16.8644		FBgn0000008	a	1.7999
	FBgn0044048	Ilp5	4.2935		FBgn0000667	Actn	1.51492		FBgn0266801	CG45263	-1.26548		FBgn0031306	CG4577	1.6122		FBgn0038879	CG17298	3.09773		FBgn0037169	CG11404	-1.9366		FBgn0053530	Acp53C14c	-2.90274		FBgn0032603	CG17928	-6.54637		FBgn0266756	btsz	1.3102
	FBgn0032850	Kua	2.1737		FBgn0027493	AdSS	2.53118		FBgn0038324	CG5038	-4.45116		FBgn0030830	CG5172	2.73806		FBgn0029994	CG2254	1.8201		FBgn0037167	CG11425	-2.78341		FBgn0015584	Acp53Ea	-4.87424		FBgn0030251	CG2145	-2.62832		FBgn0005677	dac	1.68177
	FBgn0033593	Listericin	2.74969		FBgn0286071	AdamTS-A	2.19443		FBgn0036126	CG6272	-4.01196		FBgn0027586	CG5867	2.98252		FBgn0039792	CG2267	-18.713		FBgn0037164	CG11438	-1.96964		FBgn0020765	Acp65Aa	5.0147		FBgn0029990	CG2233	-2.81274		FBgn0024244	drm	3.27203
	FBgn0037408	NPFR	3.28625		FBgn0036337	AdenoK	1.63279		FBgn0039184	CG6432	-17.3891		FBgn0036106	CG6409	2.27977		FBgn0037534	CG2781	2.53044		FBgn0036221	CG11588	-3.09		FBgn0000044	Act57B	4.15025		FBgn0029994	CG2254	-2.48948		FBgn0005558	ey	3.21559
	FBgn0004514	Oct-TyrR	1.67844		FBgn0038984	AdipoR	1.88474		FBgn0039027	CG7031	5.07908		FBgn0035693	CG8219	4.24745		FBgn0050272	CG30272	-25.4534		FBgn0035257	CG12011	2.589		FBgn0000042	Act5C	1.67452		FBgn0050158	CG30158	2.04766		FBgn0000659	fkh	-2.88719
	FBgn0035438	PHGPx	2.13582		FBgn0015010	Ag5r	-3.73651		FBgn0031940	CG7214	2.28892		FBgn0038126	CG8483	3.64382		FBgn0051121	CG31121	2.94073		FBgn0033558	CG12344	-1.93764		FBgn0000045	Act79B	2.75191		FBgn0050286	CG30286	-3.99362		FBgn0051774	fred	-1.15954
	FBgn0039152	Rootletin	3.24087		FBgn0014455	Ahcy13	4.37138		FBgn0031730	CG7236	-7.30311		FBgn0033257	CG8713	-4.19208		FBgn0051176	CG31176	2.25999		FBgn0039552	CG12426	-2.47963		FBgn0000046	Act87E	4.39707		FBgn0050287	CG30287	-3.50737		FBgn0045852	ham	-2.5191
	FBgn0003339	Scr	2.14832		FBgn0015011	Ahcy89E	4.20499		FBgn0036741	CG7510	2.00633		FBgn0032068	CG9466	19.557		FBgn0052694	CG32694	2.95906		FBgn0029930	CG12541	-1.84782		FBgn0024913	Actbeta	-1.19916		FBgn0031645	CG3036	-2.10226		FBgn0001311	kkv	2.20814
	FBgn0262870	axo	1.53071		FBgn0020764	Alas	2.5791		FBgn0034030	CG8192	3.22763		FBgn0038211	CG9649	2.77016		FBgn0085218	CG34189	-1.24889		FBgn0029730	CG12681	2.48287		FBgn0000667	Actn	1.88299		FBgn0029608	CG3091	-4.03044		FBgn0002985	odd	3.33677
	FBgn0000320	eya	2.1878		FBgn0012036	Aldh	1.66338		FBgn0045761	CHKov1	2.04585		FBgn0267012	CR45456	3.56586		FBgn0085234	CG34205	7.4652		FBgn0033955	CG12866	-2.5099		FBgn0027493	AdSS	2.09091		FBgn0051100	CG31100	-2.24846		FBgn0034157	resilin	6.87976
	FBgn0045852	ham	1.95979		FBgn0086378	Alg-2	-1.71884		FBgn0262972	CR43283	-4.76855		FBgn0010314	Cks30A	4.4082		FBgn0085427	CG34398	2.14133		FBgn0030780	CG13008	-3.11156		FBgn0037661	Ada	-5.34726		FBgn0031449	CG31689	-2.65311		FBgn0260653	serp	2.4758
	FBgn0261963	mid	3.36042		FBgn0037116	Als2	1.72854		FBgn0265050	CR44165	3.45		FBgn0033728	Cpr49Ae	2.12884		FBgn0024989	CG3777	2.55547		FBgn0036595	CG13046	19.3769		FBgn0286071	AdamTS-A	2.23828		FBgn0052091	CG32091	-2.3648		FBgn0039232	sosie	-2.80609
	FBgn0013688	mt:srRNA	1.96852		FBgn0027356	Amph	1.17853		FBgn0266168	CR44874	-15.812		FBgn0031294	IA-2	2.71093		FBgn0038820	CG4000	2.86817		FBgn0032184	CG13135	-2.7021		FBgn0036337	AdenoK	1.6277		FBgn0052204	CG32204	2.84422		FBgn0003513	ss	-3.19409
	FBgn0016919	nompB	2.91624		FBgn0012037	Ance	3.08801		FBgn0267012	CR45456	2.82118		FBgn0001257	ImpL2	1.79245		FBgn0087011	CG41520	1.85751		FBgn0031134	CG1314	-2.50718		FBgn0038984	AdipoR	2.28165		FBgn0052506	CG32506	1.3009		FBgn0261341	verm	1.91835
	FBgn0003254	rib	4.21216		FBgn0030898	Andorra	-6.08453		FBgn0033980	Cyp6a20	2.17979		FBgn0001258	ImpL3	-4.86968		FBgn0259227	CG42327	1.60694		FBgn0033851	CG13332	-2.62918		FBgn0015010	Ag5r	-5.24945		FBgn0035802	CG33275	-1.58916		FBgn0284084	wg	4.81305
	FBgn0003513	ss	2.2867		FBgn0000083	AnxB9	2.95141		FBgn0001114	Glt	2.13823		FBgn0259682	Jabba	1.90074		FBgn0259245	CG42343	-1.11538		FBgn0036443	CG13471	3.5009		FBgn0033754	Ak6	-5.21577		FBgn0034997	CG3376	-2.73134
	FBgn0024184	unc-4	2.68935		FBgn0016123	Aph-4	3.7592		FBgn0015737	Hmu	1.87482		FBgn0050360	Mal-A6	6.73756		FBgn0259823	CG42404	-1.14368		FBgn0034774	CG13526	-1.92686		FBgn0027932	Akap200	1.33086		FBgn0083956	CG34120	-2.23037
					FBgn0032136	Apoltp	2.45599		FBgn0031294	IA-2	2.51645		FBgn0002789	Mp20	2.76101		FBgn0260777	CG42571	-17.1023		FBgn0034867	CG13557	3.38552		FBgn0012036	Aldh	1.47803		FBgn0085369	CG34340	-2.21513
					FBgn0036111	Aps	1.21062		FBgn0025583	IM2	2.65184		FBgn0003149	Prm	2.18131		FBgn0039078	CG4374	2.77875		FBgn0033196	CG1358	-1.35452		FBgn0086378	Alg-2	-1.82444		FBgn0085383	CG34354	1.76361
					FBgn0033928	Arc2	-5.02748		FBgn0001258	ImpL3	-5.56583		FBgn0045038	Proc	3.61043		FBgn0266566	CG45105	-3.84514		FBgn0035041	CG13594	2.58363		FBgn0025686	Amnionless	-2.40743		FBgn0085391	CG34362	1.66639
					FBgn0000115	Arl1	-5.00335		FBgn0033593	Listericin	2.89007		FBgn0033518	Prx2540-2	5.21289		FBgn0267690	CG46026	-19.1696		FBgn0035816	CG13685	-1.43149		FBgn0027356	Amph	1.04811		FBgn0085431	CG34402	2.83408
					FBgn0000120	Arr1	2.42656		FBgn0031307	MFS3	-7.94702		FBgn0010414	SerT	6.77111		FBgn0027556	CG4928	2.36544		FBgn0036773	CG13698	-1.751		FBgn0012037	Ance	3.02608		FBgn0085446	CG34417	-1.72405
					FBgn0000121	Arr2	2.94818		FBgn0002789	Mp20	2.58762		FBgn0262717	Skeletor	2.3222		FBgn0036597	CG4962	3.48969		FBgn0031897	CG13784	2.29623		FBgn0032536	Ance-3	2.60376		FBgn0025643	CG3588	-3.58449
					FBgn0034075	Asph	3.37287		FBgn0287423	Nplp2	2.5001		FBgn0261090	Sytbeta	1.36905		FBgn0038511	CG5873	2.60251		FBgn0031770	CG13995	2.96015		FBgn0030898	Andorra	-6.21709		FBgn0040397	CG3655	-1.44887
					FBgn0036790	AstC-R1	-2.02539		FBgn0262728	Pal2	2.48442		FBgn0023479	Tequila	1.30957		FBgn0038679	CG6040	2.59311		FBgn0029962	CG1402	-2.18974		FBgn0000083	AnxB9	1.86645		FBgn0058006	CG40006	-3.6174
					FBgn0032691	Atac2	-4.76079		FBgn0261285	Ppcs	1.97785		FBgn0004117	Tm2	2.21055		FBgn0039178	CG6356	1.59115		FBgn0032318	CG14072	-2.57788		FBgn0032136	Apoltp	2.92863		FBgn0058160	CG40160	-2.80425
					FBgn0028550	Atf3	2.15757		FBgn0085407	Pvf3	-1.30246		FBgn0031692	TpnC25D	2.423		FBgn0036106	CG6409	3.68163		FBgn0036218	CG14128	-2.07869		FBgn0036111	Aps	1.53596		FBgn0034885	CG4019	-3.18247
					FBgn0029943	Atg5	-1.92701		FBgn0267385	PyK	2.22016		FBgn0035187	Trh	5.77411		FBgn0031926	CG6739	3.08477		FBgn0036146	CG14141	2.78843		FBgn0000120	Arr1	2.94047		FBgn0058470	CG40470	-2.86019
					FBgn0034366	Atg7	-4.55285		FBgn0028399	TMS1	1.65571		FBgn0053519	Unc-89	1.93468		FBgn0031942	CG7203	2.13142		FBgn0032024	CG14273	3.78572		FBgn0000121	Arr2	2.67805		FBgn0087011	CG41520	-2.42898
					FBgn0052672	Atg8a	1.24293		FBgn0010329	Tbh	6.91702		FBgn0262515	VhaAC45	1.86308		FBgn0031940	CG7214	3.4563		FBgn0032023	CG14274	5.36574		FBgn0034075	Asph	3.35343		FBgn0263077	CG43340	-2.05358
					FBgn0019637	Atu	-2.93988		FBgn0050446	Tdc2	3.72139		FBgn0260964	Vmat	4.47797		FBgn0031730	CG7236	-3.95013		FBgn0029922	CG14431	-1.17055		FBgn0266429	AstA-R1	-2.08392		FBgn0265182	CG44247	1.95723
					FBgn0013751	Awh	-4.28434		FBgn0053505	U3-55K	-19.4956		FBgn0034793	asrij	-6.45458		FBgn0038652	CG7720	1.64454		FBgn0037171	CG14459	-2.27406		FBgn0032336	AstC	2.274		FBgn0035982	CG4461	-7.25603
					FBgn0261647	Axud1	-2.34752		FBgn0262736	Vha16-1	1.88827		FBgn0011211	blw	1.5708		FBgn0034030	CG8192	4.13208		FBgn0034417	CG15117	4.47749		FBgn0032337	AstCC	6.6471		FBgn0266696	CG45186	-1.02991
					FBgn0260960	Baldspot	1.25158		FBgn0283535	Vha26	1.76282		FBgn0010497	dmGlut	2.95509		FBgn0037720	CG8312	1.92662		FBgn0030174	CG15312	-1.40142		FBgn0028550	Atf3	1.83931		FBgn0031306	CG4577	2.56137
					FBgn0035696	Best2	2.44106		FBgn0033706	Vha36-2	4.92564		FBgn0010435	emp	2.20857		FBgn0038126	CG8483	2.78141		FBgn0031132	CG15450	-2.27848		FBgn0033010	Atf6	-1.4304		FBgn0027546	CG4766	-2.8967
					FBgn0039282	Bili	-1.592		FBgn0265262	Vha68-1	3.16312		FBgn0001320	kni	2.5608		FBgn0033308	CG8736	3.27148		FBgn0032442	CG15485	-3.39309		FBgn0036255	Atg12	-4.53305		FBgn0031220	CG4822	-3.03704
					FBgn0050077	Blos1	-2.34664		FBgn0262515	VhaAC45	3.1267		FBgn0015721	ktub	-1.61873		FBgn0033760	CG8785	2.3497		FBgn0039723	CG15522	4.11272		FBgn0044452	Atg2	2.06026		FBgn0038897	CG5849	-5.90894
					FBgn0036118	Blos2	-5.52313		FBgn0028662	VhaPPA1-1	2.03728		FBgn0051004	mesh	4.4283		FBgn0032068	CG9466	15.2118		FBgn0039804	CG15544	1.95778		FBgn0029943	Atg5	-1.33259		FBgn0029835	CG5921	-4.04792
					FBgn0266717	Bruce	1.04218		FBgn0260964	Vmat	6.89811		FBgn0013688	mt:srRNA	1.43874		FBgn0030763	CG9782	3.04343		FBgn0031632	CG15628	-1.57839		FBgn0034110	Atg9	1.95073		FBgn0030870	CG6398	-3.03596
					FBgn0031696	Bub1	-1.8796		FBgn0005391	Yp2	2.44301		FBgn0045442	mthl12	18.3626		FBgn0034903	CG9850	2.36531		FBgn0030440	CG15719	-1.59764		FBgn0004854	B-H2	-2.77943		FBgn0033889	CG6701	-2.20953
					FBgn0032248	Bug22	3.13297		FBgn0004047	Yp3	2.59871		FBgn0002985	odd	3.05359		FBgn0262972	CR43283	-4.37253		FBgn0029814	CG15765	-1.51354		FBgn0015602	BEAF-32	2.18868		FBgn0036242	CG6793	-4.25098
					FBgn0032078	C1GalTA	-1.27847		FBgn0011211	blw	1.75428		FBgn0260442	rhea	1.43171		FBgn0267012	CR45456	2.76029		FBgn0038606	CG15803	-1.31832		FBgn0026562	BM-40-SPARC	2.40742		FBgn0038290	CG6912	2.35147
					FBgn0033504	CAP	1.51557		FBgn0001090	bnb	1.92818		FBgn0033782	sug	2.99198		FBgn0051973	Cda5	1.87119		FBgn0030482	CG1673	1.42163		FBgn0035696	Best2	1.4416		FBgn0036188	CG7339	2.07332
					FBgn0036219	CCDC151	-4.11199		FBgn0039932	fuss	-3.24253		FBgn0261341	verm	1.72288		FBgn0263132	Cht6	1.92585		FBgn0027589	CG1688	2.73725		FBgn0002906	Blm	-1.89076		FBgn0036522	CG7372	-3.44626
					FBgn0026143	CDC45L	-3.43563		FBgn0013688	mt:srRNA	2.37901		FBgn0016075	vkg	2.1791		FBgn0035398	Cht7	3.13658		FBgn0028544	CG16884	1.49067		FBgn0050169	Brca2	-2.62323		FBgn0035812	CG7457	-5.88375
					FBgn0033951	CG10139	-5.62614		FBgn0034728	rad50	-2.41746		FBgn0036985	zye	2.26379		FBgn0287234	Clect27	2.3721		FBgn0032479	CG16974	1.43814		FBgn0038499	Brf	-2.17468		FBgn0038652	CG7720	-2.18135
					FBgn0036353	CG10171	3.07065		FBgn0003254	rib	-4.4935						FBgn0013770	Cp1	1.56487		FBgn0033443	CG1698	2.71658		FBgn0266717	Bruce	1.26486		FBgn0033387	CG8008	-3.94296
					FBgn0039084	CG10175	2.33283		FBgn0267337	rn	-1.79611						FBgn0039805	Cpr100A	3.22121		FBgn0032285	CG17108	2.47865		FBgn0004863	C15	-5.37924		FBgn0034140	CG8317	-3.22272
					FBgn0032684	CG10178	3.00107		FBgn0003513	ss	-2.66462						FBgn0033728	Cpr49Ae	3.33949		FBgn0039473	CG17191	-3.60337		FBgn0033504	CAP	1.59733		FBgn0033919	CG8547	-1.84041
					FBgn0033970	CG10205	3.80865		FBgn0003975	vg	3.53857						FBgn0035281	Cpr62Bc	4.51909		FBgn0036391	CG17364	-1.18355		FBgn0036219	CCDC151	-2.39396		FBgn0033257	CG8713	-5.65675
					FBgn0032685	CG10211	3.09616										FBgn0035510	Cpr64Aa	3.12011		FBgn0038449	CG17562	16.2233		FBgn0038199	CCHa1	-2.63754		FBgn0033760	CG8785	-3.09355
					FBgn0039113	CG10217	2.76619										FBgn0035512	Cpr64Ac	3.73426		FBgn0035730	CG17744	-2.73719		FBgn0050106	CCHa1-R	-2.5718		FBgn0032068	CG9466	16.8995
					FBgn0035695	CG10226	2.76705										FBgn0036881	Cpr76Bd	3.82886		FBgn0028856	CG18063	-2.66372		FBgn0259231	CCKLR-17D1	-4.8794		FBgn0039594	CG9990	-2.36532
					FBgn0032783	CG10237	2.45597										FBgn0039480	Cpr97Ea	2.90679		FBgn0038653	CG18208	-1.44181		FBgn0037972	CG10005	-5.78089		FBgn0051451	CR31451	1.91425
					FBgn0027596	CG10249	2.06898										FBgn0015037	Cyp4p1	1.16804		FBgn0038470	CG18213	-5.03675		FBgn0036369	CG10089	-1.24751		FBgn0053963	CR33963	-2.78128
					FBgn0027512	CG10254	1.35037										FBgn0033980	Cyp6a20	2.14866		FBgn0036725	CG18265	-1.48242		FBgn0035702	CG10147	-3.27907		FBgn0267910	CR34335	-7.89008
					FBgn0033985	CG10257	-2.0509										FBgn0034136	DAT	1.58316		FBgn0033864	CG18368	-1.8552		FBgn0039084	CG10175	3.09681		FBgn0262903	CR43258	24.3618
					FBgn0032681	CG10283	-1.11298										FBgn0283531	Duox	2.468		FBgn0034206	CG18469	-4.5951		FBgn0032682	CG10176	1.94995		FBgn0263628	CR43637	-3.08526
					FBgn0038420	CG10311	2.23089										FBgn0005659	Ets98B	1.96579		FBgn0250839	CG2016	4.89326		FBgn0032684	CG10178	2.9526		FBgn0263659	CR43650	-3.43777
					FBgn0027562	CG10345	2.41963										FBgn0026077	Gasp	3.10553		FBgn0050015	CG30015	2.03506		FBgn0032793	CG10189	-3.41532		FBgn0263870	CR43717	-6.32667
					FBgn0034638	CG10433	2.27069										FBgn0001224	Hsp23	-3.30753		FBgn0028496	CG30116	-1.22979		FBgn0033970	CG10205	3.27742		FBgn0265076	CR44187	2.58972
					FBgn0035656	CG10479	2.44147										FBgn0026415	Idgf4	1.82289		FBgn0050158	CG30158	-1.29199		FBgn0032685	CG10211	3.14234		FBgn0265077	CR44188	2.42353
					FBgn0039321	CG10550	3.1961										FBgn0001257	ImpL2	3.71905		FBgn0050391	CG30391	3.56066		FBgn0039112	CG10219	3.31593		FBgn0265691	CR44498	-3.69441
					FBgn0039324	CG10553	3.96431										FBgn0001258	ImpL3	-4.53812		FBgn0050393	CG30393	3.12718		FBgn0035695	CG10226	2.17893		FBgn0265977	CR44756	-3.11622
					FBgn0039326	CG10562	4.14195										FBgn0010238	Lac	1.49034		FBgn0051202	CG31202	3.04185		FBgn0032783	CG10237	2.09241		FBgn0266005	CR44779	-1.84416
					FBgn0037044	CG10585	-6.08794										FBgn0031307	MFS3	-5.17386		FBgn0051323	CG31323	-1.22131		FBgn0033985	CG10257	-2.26869		FBgn0266327	CR44992	-5.89586
					FBgn0032721	CG10602	1.82814										FBgn0035049	Mmp1	2.0661		FBgn0051708	CG31708	-1.96356		FBgn0033990	CG10265	-2.25983		FBgn0266624	CR45131	-3.48092
					FBgn0035612	CG10625	2.47772										FBgn0015766	Msr-110	1.7057		FBgn0051910	CG31910	2.28358		FBgn0033019	CG10395	-3.17625		FBgn0266925	CR45376	-3.24781
					FBgn0032836	CG10680	3.12421										FBgn0004647	N	1.87838		FBgn0047338	CG32148	-2.45673		FBgn0033020	CG10396	-5.19178		FBgn0267052	CR45496	7.92835
					FBgn0036291	CG10681	-4.76823										FBgn0011280	Obp19d	2.63616		FBgn0052204	CG32204	-1.79361		FBgn0038395	CG10407	5.15592		FBgn0051116	ClC-a	-2.21694
					FBgn0036360	CG10713	-1.98614										FBgn0011695	PebIII	2.34905		FBgn0052206	CG32206	1.75703		FBgn0032689	CG10413	1.49504		FBgn0287234	Clect27	-2.60262
					FBgn0038163	CG10841	-19.3174										FBgn0004577	Pxd	3.27635		FBgn0052333	CG32333	-1.50775		FBgn0034638	CG10433	2.38422		FBgn0023076	Clk	-2.28975
					FBgn0027552	CG10863	2.56321										FBgn0038880	SIFaR	-2.56223		FBgn0043783	CG32444	3.52465		FBgn0033017	CG10465	-2.12051		FBgn0014469	Cyp4e2	-3.84738
					FBgn0031347	CG10869	-1.52998										FBgn0262717	Skeletor	2.07413		FBgn0052450	CG32450	-1.50142		FBgn0035678	CG10469	-5.2907		FBgn0030304	Cyp4g15	-3.00927
					FBgn0038796	CG10881	-8.4835										FBgn0033631	Sod3	2.27232		FBgn0052457	CG32457	-1.78761		FBgn0032827	CG10481	-2.53264		FBgn0033980	Cyp6a20	-2.65937
					FBgn0036207	CG10907	-5.78883										FBgn0010329	Tbh	-1.80045		FBgn0052507	CG32507	-1.96047		FBgn0039321	CG10550	2.73707		FBgn0025454	Cyp6g1	-6.82148
					FBgn0034253	CG10936	2.7869										FBgn0041181	Tep3	2.33382		FBgn0052521	CG32521	1.76999		FBgn0039324	CG10553	2.7768		FBgn0031126	Cyp6v1	-3.90846
					FBgn0030004	CG10958	-2.47333										FBgn0011722	Tig	3.52538		FBgn0052549	CG32549	1.5466		FBgn0032721	CG10602	1.49482		FBgn0000411	D	2.80278
					FBgn0036306	CG10973	-2.18538										FBgn0032593	Trpgamma	-3.31962		FBgn0034978	CG3257	1.70275		FBgn0035612	CG10625	4.78383		FBgn0034136	DAT	2.80356
					FBgn0031735	CG11029	-3.82282										FBgn0000097	aop	1.13366		FBgn0052683	CG32683	-1.79051		FBgn0036289	CG10657	3.87977		FBgn0085390	Dgk	1.55911
					FBgn0037544	CG11035	-5.59282										FBgn0087007	bbg	2.17902		FBgn0267253	CG32700	-1.4407		FBgn0032836	CG10680	3.19283		FBgn0032048	Dh31	3.03435
					FBgn0039244	CG11069	3.67556										FBgn0027660	blot	1.71924		FBgn0267796	CG3280	2.0459		FBgn0034082	CG10734	-3.51937		FBgn0000157	Dll	-2.62338
					FBgn0034693	CG11073	2.81098										FBgn0001090	bnb	2.4899		FBgn0052846	CG32846	-2.23655		FBgn0029656	CG10793	-2.81191		FBgn0011582	Dop1R1	1.81572
					FBgn0039241	CG11089	1.85571										FBgn0014135	bnl	2.04905		FBgn0052944	CG32944	-1.92623		FBgn0029664	CG10802	-4.545		FBgn0015872	Drip	-3.96101
					FBgn0030528	CG11095	-5.79099										FBgn0284247	ds	2.25052		FBgn0052982	CG32982	1.87253		FBgn0038845	CG10827	-2.96851		FBgn0283531	Duox	-2.45259
					FBgn0031732	CG11149	-15.4559										FBgn0000504	dsx	2.41894		FBgn0053093	CG33093	-4.28702		FBgn0031347	CG10869	-3.71839		FBgn0003731	Egfr	-2.89689
					FBgn0033249	CG11191	-4.85713										FBgn0000527	e	1.97018		FBgn0053111	CG33111	2.10612		FBgn0038804	CG10877	-5.5252		FBgn0266084	Fhos	-1.44817
					FBgn0037280	CG1126	-5.80249										FBgn0000542	ec	1.66404		FBgn0053639	CG33639	1.54189		FBgn0038796	CG10881	-3.79393		FBgn0001104	Galphai	-3.65645
					FBgn0036342	CG11279	-5.65672										FBgn0010435	emp	2.48501		FBgn0054028	CG34028	-3.20962		FBgn0031178	CG10918	-5.60969		FBgn0036428	Gbs-70E	-2.201
					FBgn0030056	CG11284	1.64478										FBgn0000658	fj	2.16861		FBgn0083945	CG34109	-1.9749		FBgn0034253	CG10936	3.40287		FBgn0001114	Glt	-1.83092
					FBgn0030058	CG11294	-5.59032										FBgn0011591	fng	2.21196		FBgn0083949	CG34113	-1.75944		FBgn0030010	CG10959	-2.98112		FBgn0013272	Gp150	-1.86045
					FBgn0037106	CG11307	3.54085										FBgn0259211	grh	2.48575		FBgn0083950	CG34114	-1.68856		FBgn0036316	CG10960	-1.61669		FBgn0001145	Gs2	-1.48649
					FBgn0031837	CG11320	3.92588										FBgn0001168	h	2.10242		FBgn0083963	CG34127	-1.81683		FBgn0036306	CG10973	-6.14417		FBgn0029167	Hml	-2.40545
					FBgn0031857	CG11321	3.53272										FBgn0003997	hid	1.75578		FBgn0263829	CG34334	-2.54554		FBgn0030524	CG10993	-5.90409		FBgn0014859	Hr38	3.10305
					FBgn0035546	CG11345	5.96283										FBgn0041150	hoe1	1.20299		FBgn0085376	CG34347	-1.22595		FBgn0031735	CG11029	-3.09816		FBgn0013278	Hsp70Bb	2.28774
					FBgn0035490	CG1136	3.57832										FBgn0011236	ken	2.59382		FBgn0085380	CG34351	3.96843		FBgn0031736	CG11030	-1.60463		FBgn0028374	Hug	2.83902
					FBgn0034200	CG11395	2.88442										FBgn0001311	kkv	3.12788		FBgn0085382	CG34353	-1.68179		FBgn0037544	CG11035	-3.16999		FBgn0031294	IA-2	2.17563
					FBgn0037021	CG11399	-1.65175										FBgn0286203	laccase2	2.1748		FBgn0085383	CG34354	-1.17616		FBgn0030536	CG11068	-6.23257		FBgn0020416	Idgf1	-3.49402
					FBgn0024366	CG11409	4.70921										FBgn0020278	loco	2.11087		FBgn0085384	CG34355	3.13468		FBgn0034693	CG11073	2.42161		FBgn0026415	Idgf4	-1.92327
					FBgn0037504	CG1142	-3.82888										FBgn0086711	mol	2.80663		FBgn0085385	CG34356	-1.17229		FBgn0039241	CG11089	1.75275		FBgn0027108	Inx2	-2.34795
					FBgn0034251	CG11423	-2.87276										FBgn0025631	moody	1.53092		FBgn0085386	CG34357	1.6037		FBgn0030528	CG11095	-5.92354		FBgn0023549	Mct1	-3.1065
					FBgn0037166	CG11426	-2.51245										FBgn0045442	mthl12	15.6155		FBgn0085399	CG34370	1.51785		FBgn0033165	CG11113	-5.77337		FBgn0004513	Mdr65	-3.7048
					FBgn0037164	CG11438	-2.22335										FBgn0034797	nahoda	1.79415		FBgn0085413	CG34384	-1.36384		FBgn0037304	CG1113	-5.13704		FBgn0026061	Mipp1	-3.2012
					FBgn0024985	CG11448	1.29114										FBgn0002930	nec	2.14707		FBgn0085420	CG34391	-1.47779		FBgn0031734	CG11147	1.06476		FBgn0036844	Mkp3	1.50135
					FBgn0037162	CG11449	-4.33309										FBgn0031097	obst-A	3.723		FBgn0085422	CG34393	-1.41948		FBgn0030511	CG11158	-4.64919		FBgn0033438	Mmp2	-1.03962
					FBgn0037031	CG11456	-1.47626										FBgn0020521	pio	1.79322		FBgn0283427	CG3523	1.1709		FBgn0034500	CG11200	2.67118		FBgn0015766	Msr-110	-1.80859
					FBgn0040637	CG11458	5.48122										FBgn0005626	ple	2.7152		FBgn0028888	CG4168	-1.12588		FBgn0034488	CG11208	1.94262		FBgn0036279	Ncc69	-4.03902
					FBgn0035346	CG1146	1.60834										FBgn0250871	pot	2.39002		FBgn0031251	CG4213	2.16653		FBgn0037195	CG11226	-4.06499		FBgn0017561	Ork1	-3.1837
					FBgn0036221	CG11588	-5.12952										FBgn0028622	qsm	1.97018		FBgn0259145	CG42260	-1.51819		FBgn0039939	CG11231	-2.71636		FBgn0035975	PGRP-LA	-3.12097
					FBgn0036212	CG11597	-1.88419										FBgn0002306	sas	2.37178		FBgn0259150	CG42265	2.21975		FBgn0037290	CG1124	3.03744		FBgn0035976	PGRP-LC	-2.90039
					FBgn0032964	CG11630	-5.28558										FBgn0260653	serp	3.0279		FBgn0259198	CG42302	-4.82307		FBgn0034442	CG11257	-5.0283		FBgn0000273	Pka-C1	1.6962
					FBgn0033283	CG11635	-1.81356										FBgn0003396	shn	1.11687		FBgn0259213	CG42313	-1.73853		FBgn0034721	CG11298	-2.70215		FBgn0022382	Pka-R2	2.2333
					FBgn0040351	CG11638	-2.37679										FBgn0016984	sktl	1.88152		FBgn0259239	CG42337	1.91847		FBgn0037070	CG11309	-5.56296		FBgn0261285	Ppcs	1.4148
					FBgn0030638	CG11655	3.72909										FBgn0037203	slif	2.24403		FBgn0259241	CG42339	-2.14319		FBgn0031857	CG11321	3.81565		FBgn0029723	Proc-R	-3.3161
					FBgn0029856	CG11700	-5.31262										FBgn0031879	uif	2.6022		FBgn0259242	CG42340	2.41941		FBgn0031856	CG11322	-4.53916		FBgn0037012	Rcd2	-2.47719
					FBgn0264712	CG1172	-2.088										FBgn0261341	verm	2.73057		FBgn0259245	CG42343	-1.80497		FBgn0035537	CG11342	-5.20603		FBgn0036463	Reck	-1.99944
					FBgn0038683	CG11779	-2.15647										FBgn0034718	wdp	1.76216		FBgn0259677	CG42346	-1.26496		FBgn0035546	CG11345	6.22906		FBgn0087002	Rfabg	-2.78447
					FBgn0036992	CG11796	2.07052										FBgn0041711	yellow-e	3.07838		FBgn0259821	CG42402	-1.36568		FBgn0035490	CG1136	3.41725		FBgn0261461	RhoGAP18B	-1.96157
					FBgn0039628	CG11841	4.29744														FBgn0259927	CG42450	1.51816		FBgn0034737	CG11362	-5.82246		FBgn0035574	RhoGEF64C	-2.62441
					FBgn0039637	CG11880	1.81687														FBgn0260658	CG42541	-1.0212		FBgn0037454	CG1137	-2.57326		FBgn0051719	RluA-1	-1.74267
					FBgn0039331	CG11913	-3.50063														FBgn0260971	CG42594	3.06238		FBgn0031214	CG11374	-2.35459		FBgn0025391	Scgdelta	-1.94651
					FBgn0039274	CG11920	-5.11514														FBgn0261555	CG42673	3.26831		FBgn0034200	CG11395	4.12896		FBgn0264273	Sema-2b	1.16298
					FBgn0039656	CG11951	2.76263														FBgn0261556	CG42674	-1.0135		FBgn0037021	CG11399	-1.19653		FBgn0284221	Sema-5c	-2.93706
					FBgn0037655	CG11984	1.44107														FBgn0261698	CG42732	-1.7493		FBgn0037169	CG11404	-6.15818		FBgn0010620	Sip1	-2.87005
					FBgn0035443	CG12010	-5.50547														FBgn0263354	CG42784	1.86725		FBgn0024366	CG11409	3.2006		FBgn0035815	Snmp2	-2.5125
					FBgn0035257	CG12011	-6.61239														FBgn0261859	CG42788	1.26456		FBgn0035022	CG11413	3.50223		FBgn0042630	Sox21b	2.35846
					FBgn0035429	CG12017	4.39548														FBgn0031258	CG4297	1.19933		FBgn0034251	CG11423	-3.39431		FBgn0262057	Spn77Ba	-2.79814
					FBgn0035179	CG12038	-4.57275														FBgn0262508	CG43078	3.02226		FBgn0037167	CG11425	-4.18205		FBgn0004359	T48	-2.60135
					FBgn0030065	CG12075	2.84383														FBgn0262568	CG43108	-3.23538		FBgn0037165	CG11437	-5.65605		FBgn0086358	Tab2	-2.52504
					FBgn0030457	CG12096	-3.94091														FBgn0263034	CG43329	-1.92312		FBgn0037164	CG11438	-1.98173		FBgn0010329	Tbh	2.15281
					FBgn0037387	CG1213	2.78926														FBgn0263035	CG43330	-2.07406		FBgn0037162	CG11449	-2.33985		FBgn0041182	Tep2	-2.723
					FBgn0260462	CG12163	1.43672														FBgn0263131	CG43373	-1.41555		FBgn0037031	CG11456	-1.23015		FBgn0023479	Tequila	-1.80543
					FBgn0037974	CG12224	2.85484														FBgn0028481	CG4341	1.82358		FBgn0040637	CG11458	4.6204		FBgn0026319	Traf4	-2.99594
					FBgn0026148	CG12253	-6.12994														FBgn0263772	CG43689	-2.26931		FBgn0034687	CG11475	-5.1144		FBgn0031850	Tsp	-2.71467
					FBgn0032620	CG12288	-2.33485														FBgn0263980	CG43729	-1.18923		FBgn0036221	CG11588	-8.34152		FBgn0028670	Vha100-2	-2.41632
					FBgn0032295	CG12299	2.2025														FBgn0264339	CG43795	3.33875		FBgn0036212	CG11597	-1.63674		FBgn0260964	Vmat	2.53699
					FBgn0033543	CG12338	3.91192														FBgn0264489	CG43897	1.63687		FBgn0031232	CG11617	-6.02342		FBgn0005391	Yp2	-2.38393
					FBgn0030596	CG12398	-4.13747														FBgn0264503	CG43902	-1.09601		FBgn0032964	CG11630	-4.45634		FBgn0004047	Yp3	-2.87428
					FBgn0039552	CG12426	-3.00905														FBgn0039075	CG4393	-1.20459		FBgn0033283	CG11635	-1.66428		FBgn0265991	Zasp52	-1.89236
					FBgn0039543	CG12428	2.28623														FBgn0264750	CG44008	-1.37719		FBgn0040341	CG11664	-1.92233		FBgn0000008	a	1.636
					FBgn0029930	CG12541	-1.55309														FBgn0264907	CG44098	-1.25543		FBgn0033028	CG11665	-1.57775		FBgn0029095	aru	-2.60712
					FBgn0039958	CG12567	-1.46245														FBgn0265002	CG44153	-2.33438		FBgn0029856	CG11700	-3.88939		FBgn0262870	axo	-1.71535
					FBgn0037213	CG12581	1.9263														FBgn0265257	CG44271	2.51799		FBgn0037239	CG11739	1.38322		FBgn0000163	baz	-2.523
					FBgn0037215	CG12582	2.60808														FBgn0265595	CG44422	-1.31823		FBgn0040531	CG11741	4.27701		FBgn0027660	blot	-1.8473
					FBgn0037294	CG12590	-3.24959														FBgn0266100	CG44837	-1.57294		FBgn0036992	CG11796	1.8548		FBgn0266756	btsz	1.4792
					FBgn0037941	CG12594	-1.65838														FBgn0266801	CG45263	-1.56698		FBgn0030346	CG11802	-2.06456		FBgn0040233	cana	-2.26984
					FBgn0030224	CG12637	-5.24846														FBgn0267163	CG45603	-2.5339		FBgn0039637	CG11880	1.51284		FBgn0263258	chas	-1.76315
					FBgn0030202	CG12640	-6.72445														FBgn0267431	CG45784	-2.06653		FBgn0039313	CG11892	-3.01193		FBgn0014141	cher	-1.88657
					FBgn0040942	CG12643	3.119														FBgn0035598	CG4669	-1.76275		FBgn0031248	CG11912	-3.01938		FBgn0010316	dap	-2.80773
					FBgn0030886	CG12672	-2.27004														FBgn0030778	CG4678	-1.59656		FBgn0039656	CG11951	2.80956		FBab0000112	dp	-2.06592
					FBgn0031388	CG12674	-4.00552														FBgn0027546	CG4766	-2.1686		FBgn0027503	CG11970	1.39867		FBgn0284247	ds	-2.39593
					FBgn0029730	CG12681	-1.99484														FBgn0028514	CG4793	-1.95526		FBgn0037648	CG11975	-2.29705		FBgn0035290	dsb	-3.22743
					FBgn0046294	CG12699	-3.81768														FBgn0032187	CG4839	-1.77521		FBgn0037652	CG11980	3.01939		FBgn0000527	e	-2.09593
					FBgn0035321	CG1275	1.87455														FBgn0034911	CG5549	-1.45106		FBgn0035443	CG12010	-3.82968		FBgn0005558	ey	1.72986
					FBgn0033301	CG12780	-5.63332														FBgn0032666	CG5758	1.29484		FBgn0035179	CG12038	-6.18616		FBgn0000320	eya	-1.96892
					FBgn0038448	CG12783	6.43357														FBgn0039380	CG5890	-1.41904		FBgn0030065	CG12075	2.51654		FBgn0011591	fng	-2.88368
					FBgn0037796	CG12814	2.47039														FBgn0036220	CG5897	-2.9783		FBgn0035402	CG12082	2.49254		FBgn0032773	fon	-3.23595
					FBgn0033948	CG12863	-5.93147														FBgn0036750	CG6034	-1.93031		FBgn0030457	CG12096	-1.85462		FBgn0000721	for	-2.43284
					FBgn0033955	CG12866	-2.54028														FBgn0034725	CG6044	2.06578		FBgn0035232	CG12099	1.15741		FBgn0038197	foxo	-2.05389
					FBgn0035401	CG1291	-5.7557														FBgn0036747	CG6052	-2.56799		FBgn0030102	CG12119	4.65946		FBgn0004652	fru	2.7791
					FBgn0033490	CG12917	-6.70705														FBgn0030913	CG6123	-1.39069		FBgn0037387	CG1213	2.50567		FBgn0023441	fus	-2.2551
					FBgn0030859	CG12990	-5.71598														FBgn0038922	CG6439	1.34358		FBgn0037325	CG12147	-3.50754		FBgn0008636	hbn	-2.4842
					FBgn0030829	CG12998	4.07201														FBgn0035903	CG6765	-1.69865		FBgn0033232	CG12159	2.05145		FBgn0033448	hebe	-3.66834
					FBgn0030794	CG13005	-5.60496														FBgn0031730	CG7236	-3.86328		FBgn0031021	CG12203	3.56067		FBgn0086677	jeb	2.36078
					FBgn0030780	CG13008	-3.71486														FBgn0035260	CG7991	2.46984		FBgn0029810	CG12239	4.81531		FBgn0004167	kst	-2.04466
					FBgn0036600	CG13043	5.05091														FBgn0035733	CG8641	-1.89518		FBgn0038304	CG12241	-2.07087		FBgn0010651	l(2)08717	-2.94997
					FBgn0036584	CG13054	-4.5421														FBgn0037676	CG8861	-1.68314		FBgn0039131	CG12268	2.54071		FBgn0286203	laccase2	-2.13221
					FBgn0036583	CG13055	-2.53093														FBgn0030614	CG9072	-1.83746		FBgn0032620	CG12288	-2.48327		FBgn0002567	ltd	-2.00244
					FBgn0036589	CG13067	5.26376														FBgn0034497	CG9090	2.44766		FBgn0039419	CG12290	1.4367		FBgn0260745	mfas	-2.19354
					FBgn0032810	CG13077	-4.20537														FBgn0032068	CG9466	20.5892		FBgn0033542	CG12309	-1.60877		FBgn0027579	mino	-2.23353
					FBgn0035523	CG1311	2.37165														FBgn0030592	CG9514	1.35425		FBgn0035134	CG1231	-4.24547		FBgn0045442	mthl12	16.9444
					FBgn0032156	CG13124	3.00393														FBgn0030590	CG9518	1.35838		FBgn0033558	CG12344	-1.7288		FBgn0262737	mub	1.73161
					FBgn0031134	CG1314	-2.39329														FBgn0030761	CG9784	1.39579		FBgn0036082	CG12362	-4.74978		FBgn0000036	nAChRalpha1	1.63151
					FBgn0033767	CG13148	-5.70117														FBgn0262160	CG9932	2.39161		FBgn0030596	CG12398	-3.73943		FBgn0034797	nahoda	-1.93407
					FBgn0033712	CG13163	-5.89255														FBgn0261503	CR42651	-5.05628		FBgn0039552	CG12426	-3.12276		FBgn0085417	natalisin	-4.87499
					FBgn0033661	CG13185	1.56097														FBgn0262974	CR43285	2.96793		FBgn0031201	CG12446	-1.92505		FBgn0015522	olf186-M	-2.57532
					FBgn0033653	CG13192	-3.67708														FBgn0263332	CR43413	-2.43184		FBgn0028857	CG12448	-3.69146		FBgn0020521	pio	-1.87244
					FBgn0032577	CG13244	-2.6912														FBgn0263453	CR43476	-3.27186		FBgn0029657	CG12535	-2.95501		FBgn0003090	pk	-2.26977
					FBgn0040827	CG13315	2.69119														FBgn0263506	CR43495	1.83607		FBgn0030586	CG12539	-2.87922		FBgn0003118	pnt	-2.13436
					FBgn0033851	CG13332	-2.97944														FBgn0263615	CR43624	-3.37426		FBgn0029930	CG12541	-1.81009		FBgn0267505	pre-rRNA:CR45845	-2.92307
					FBgn0033871	CG13339	3.16694														FBgn0264328	CR43787	2.75458		FBgn0250830	CG12547	-1.1937		FBgn0035770	pst	-2.27328
					FBgn0033884	CG13344	-3.18567														FBgn0264336	CR43792	3.2548		FBgn0037213	CG12581	1.54282		FBgn0028622	qsm	-3.87276
					FBgn0025620	CG13360	3.34154														FBgn0264374	CR43826	-3.07312		FBgn0037294	CG12590	-4.59935		FBgn0038946	rdhB	-3.48278
					FBgn0029531	CG13362	-6.51369														FBgn0264376	CR43828	-1.29118		FBgn0037941	CG12594	-2.20044		FBgn0004400	rhi	-3.84488
					FBgn0040370	CG13375	-1.32466														FBgn0264390	CR43838	-3.42842		FBgn0030224	CG12637	-4.30726		FBgn0041096	rols	-2.81217
					FBgn0014417	CG13397	3.84482														FBgn0264878	CR44069	3.23293		FBgn0030071	CG12661	-2.90596		FBgn0003301	rut	1.286
					FBgn0035097	CG13405	-7.3668														FBgn0264879	CR44070	2.91501		FBgn0030074	CG12662	-3.1757		FBgn0032840	sNPF	1.85202
					FBgn0038929	CG13408	-7.30231														FBgn0264940	CR44109	-1.75018		FBgn0030886	CG12672	-1.98507		FBgn0025697	santa-maria	-3.21549
					FBgn0036442	CG13473	-3.43666														FBgn0265050	CR44165	-1.89458		FBgn0031388	CG12674	-7.16767		FBgn0003391	shg	-2.26262
					FBgn0036441	CG13476	-5.27095														FBgn0265106	CR44208	2.47019		FBgn0029730	CG12681	-4.35635		FBgn0004567	slp2	-2.58545
					FBgn0034774	CG13526	-2.7632														FBgn0265164	CR44233	-2.33513		FBgn0030443	CG12715	-3.04223		FBgn0003460	so	-1.83102
					FBgn0039161	CG13606	2.55442														FBgn0265592	CR44419	-2.69354		FBgn0035321	CG1275	1.34177		FBgn0003499	sr	2.73259
					FBgn0040600	CG13631	2.21346														FBgn0265685	CR44492	-2.10925		FBgn0033301	CG12780	-4.80408		FBgn0003507	srp	-2.68485
					FBgn0265266	CG13639	3.29064														FBgn0265823	CR44612	-2.09508		FBgn0037796	CG12814	1.87532		FBgn0020299	stumps	-2.19201
					FBgn0040601	CG13643	3.56991														FBgn0265995	CR44770	-6.68404		FBgn0033955	CG12866	-5.53898		FBgn0086708	stv	1.7229
					FBgn0035844	CG13676	4.21811														FBgn0266630	CR45137	-2.3124		FBgn0039544	CG12877	-2.08687		FBgn0003651	svp	-2.3869
					FBgn0035816	CG13685	-1.37715														FBgn0266750	CR45223	-1.50094		FBgn0033521	CG12896	4.99504		FBgn0000964	tj	-3.12739
					FBgn0031235	CG13693	-3.12209														FBgn0266871	CR45332	-2.13281		FBgn0033516	CG12898	-5.7672		FBgn0019650	toy	1.95822
					FBgn0033482	CG1371	1.78131														FBgn0266886	CR45347	-2.14786		FBgn0250840	CG12907	-2.79092		FBgn0284408	trol	-1.97807
					FBgn0035563	CG13716	-5.56274														FBgn0266911	CR45371	4.47733		FBgn0033490	CG12917	-4.89925		FBgn0003870	ttk	-2.01052
					FBgn0035553	CG13722	3.28529														FBgn0266931	CR45382	-2.14053		FBgn0033461	CG12923	-1.91424		FBgn0284435	tyn	2.11341
					FBgn0036717	CG13731	3.77657														FBgn0267020	CR45464	-2.34144		FBgn0034031	CG12963	-5.39575		FBgn0031879	uif	-2.3854
					FBgn0036382	CG13737	-1.89101														FBgn0267116	CR45556	-1.52879		FBgn0037042	CG12984	-5.43368		FBgn0003996	w	-2.5961
					FBgn0031935	CG13793	4.46568														FBgn0267117	CR45557	-1.7927		FBgn0030881	CG12985	-2.30365		FBgn0261563	wb	-2.47756
					FBgn0040588	CG13841	-1.90703														FBgn0267323	CR45759	-4.21333		FBgn0030859	CG12990	-5.84854		FBgn0052311	zormin	-1.84618
					FBgn0035157	CG13894	-2.0567														FBgn0267400	CR45762	-2.45301		FBgn0030846	CG12992	-2.38322
					FBgn0035159	CG13896	-5.51507														FBgn0267537	CR45877	-2.81842		FBgn0030829	CG12998	5.08907
					FBgn0035161	CG13898	-4.94275														FBgn0267570	CR45910	-1.28936		FBgn0030807	CG13000	-4.84388
					FBgn0035162	CG13900	-3.4523														FBgn0267624	CR45962	-1.33125		FBgn0030798	CG13003	2.33217
					FBgn0035186	CG13912	4.63213														FBgn0267638	CR45976	-2.09159		FBgn0030794	CG13005	-3.768
					FBgn0032851	CG13970	-4.81768														FBgn0267659	CR45997	-3.35217		FBgn0030780	CG13008	-7.20354
					FBgn0260452	CG13984	-2.59418														FBgn0267673	CR46009	-2.12769		FBgn0029669	CG13021	-5.27708
					FBgn0031772	CG13994	-5.44085														FBgn0267680	CR46016	-2.35852		FBgn0036600	CG13043	3.14186
					FBgn0031716	CG14015	-3.82848														FBgn0267786	CR46117	-2.22098		FBgn0036595	CG13046	23.514
					FBgn0031659	CG14043	3.21585														FBgn0264386	Ca-alpha1T	-1.47807		FBgn0036584	CG13054	-3.59121
					FBgn0036861	CG14089	-5.56467														FBgn0262018	CadN2	-1.9591		FBgn0036583	CG13055	-3.90362
					FBgn0036889	CG14100	-5.85917														FBgn0013995	Calx	-1.02743		FBgn0036589	CG13067	3.8337
					FBgn0036218	CG14128	-7.74493														FBgn0052183	Ccn	-1.91692		FBgn0032803	CG13082	4.17828
					FBgn0040817	CG14132	2.64446														FBgn0000299	Cg25C	1.97647		FBgn0032047	CG13088	-5.02069
					FBgn0036178	CG14137	-5.47905														FBgn0000302	Cha	-1.34716		FBgn0035523	CG1311	1.65886
					FBgn0029665	CG14270	-6.00014														FBgn0010314	Cks30A	4.1064		FBgn0032139	CG13116	-2.56503
					FBgn0032022	CG14275	2.55352														FBgn0261612	CngA	-2.10451		FBgn0032156	CG13124	3.03287
					FBgn0038654	CG14298	3.46328														FBgn0033728	Cpr49Ae	1.7655		FBgn0032188	CG13137	-5.68303
					FBgn0038651	CG14299	1.37153														FBgn0035281	Cpr62Bc	1.80437		FBgn0031134	CG1314	-4.46083
					FBgn0038629	CG14304	1.92465														FBgn0013767	Crz	6.20994		FBgn0033750	CG13151	-5.99708
					FBgn0038581	CG14314	-5.36453														FBgn0032693	Cyp310a1	2.68586		FBgn0033712	CG13163	-5.06331
					FBgn0038102	CG14383	-1.7481														FBgn0085390	Dgk	-1.74072		FBgn0033705	CG13168	-4.8977
					FBgn0030038	CG1440	2.68766														FBgn0011582	Dop1R1	-1.29078		FBgn0033667	CG13183	2.88481
					FBgn0030583	CG14410	-5.29567														FBgn0053517	Dop2R	-1.86026		FBgn0033661	CG13185	1.20243
					FBgn0029643	CG14420	-6.41193														FBgn0024732	Drep-1	2.6409		FBgn0033653	CG13192	-2.7449
					FBgn0029922	CG14431	-1.17561														FBgn0028407	Drep-3	3.77285		FBgn0033650	CG13193	-7.21527
					FBgn0029915	CG14434	-6.82325														FBgn0033791	Drl-2	-1.34646		FBgn0062449	CG13197	-1.56456
					FBgn0037171	CG14459	-2.49456														FBgn0261046	Dscam3	-1.70275		FBgn0032577	CG13244	-3.04163
					FBgn0037535	CG14463	-5.99436														FBgn0038874	ETHR	3.82468		FBgn0036984	CG13248	-2.43455
					FBgn0033000	CG14464	-2.05103														FBgn0026439	Eaat1	4.80197		FBgn0037014	CG13251	-6.29156
					FBgn0039612	CG14523	-3.80942														FBgn0004910	Eip63F-1	1.70574		FBgn0032613	CG13283	3.09588
					FBgn0039613	CG14527	-2.75632														FBgn0011589	Elk	-1.58		FBgn0035648	CG13288	-5.31786
					FBgn0037149	CG14561	-5.47751														FBgn0005658	Ets65A	2.68981		FBgn0033851	CG13332	-1.97486
					FBgn0037142	CG14562	-1.31716														FBgn0035385	FMRFaR	-2.5965		FBgn0033863	CG13337	-2.68191
					FBgn0030558	CG1461	2.32223														FBgn0000639	Fbp1	3.94588		FBgn0025620	CG13360	2.27118
					FBgn0037288	CG14661	2.42887														FBgn0264606	Fife	-1.14077		FBgn0029532	CG13361	-5.05106
					FBgn0037822	CG14683	-2.91681														FBgn0085397	Fili	-1.39381		FBgn0040370	CG13375	-1.0157
					FBgn0037835	CG14687	3.61366														FBgn0264078	Flo2	2.64318		FBgn0035097	CG13405	-5.53781
					FBgn0037836	CG14692	-2.60824														FBgn0030897	Frq1	1.83013		FBgn0034532	CG13436	-2.05081
					FBgn0033236	CG14764	-1.63194														FBgn0004509	Fur1	2.63377		FBgn0034546	CG13442	-2.59778
					FBgn0040777	CG14767	1.39866														FBgn0260446	GABA-B-R1	1.42349		FBgn0036532	CG13445	-3.70866
					FBgn0035755	CG14830	2.64164														FBgn0038149	GILT1	3.70314		FBgn0036471	CG13460	-2.3184
					FBgn0031174	CG1486	1.87338														FBgn0001122	Galphao	1.82856		FBgn0036442	CG13473	-2.67445
					FBgn0038422	CG14880	3.16038														FBgn0036862	Gbs-76A	-1.38889		FBgn0036441	CG13476	-4.44171
					FBgn0038429	CG14882	-3.35041														FBgn0001114	Glt	1.58472		FBgn0036421	CG13481	-6.13153
					FBgn0038428	CG14894	-3.85914														FBgn0024963	GluClalpha	-1.49228		FBgn0034723	CG13506	1.32003
					FBgn0030361	CG1492	-6.54601														FBgn0004619	GluRIA	-1.8231		FBgn0034774	CG13526	-2.30071
					FBgn0031169	CG1494	-3.15963														FBgn0264000	GluRIB	-1.52182		FBgn0034776	CG13527	-2.7824
					FBgn0032402	CG14945	2.88077														FBgn0264574	Glut1	1.71071		FBgn0034833	CG13539	-2.31745
					FBgn0035410	CG14964	3.01973														FBgn0041242	Gr47a	-2.03092		FBgn0035041	CG13594	-1.75094
					FBgn0035469	CG14977	-5.80846														FBgn0001142	Gs1	1.70252		FBgn0039161	CG13606	3.29942
					FBgn0035477	CG14982	-1.56904														FBgn0010226	GstS1	2.85659		FBgn0039151	CG13607	1.82973
					FBgn0035480	CG14984	3.95518														FBgn0013973	Gycbeta100B	1.40615		FBgn0039200	CG13616	-4.61455
					FBgn0035544	CG15021	3.56506														FBgn0037675	HP1e	-2.61622		FBgn0040600	CG13631	2.64539
					FBgn0035548	CG15023	8.4149														FBgn0013278	Hsp70Bb	1.90519		FBgn0265266	CG13639	2.74394
					FBgn0030938	CG15047	-3.91138														FBgn0261624	I-3	-2.30702		FBgn0040601	CG13643	4.46141
					FBgn0034331	CG15067	4.90662														FBgn0033515	Ir47a	-1.6652		FBgn0035890	CG13667	-3.20217
					FBgn0034391	CG15080	2.96002														FBgn0265141	Ir47b	-2.28205		FBgn0035844	CG13676	2.85549
					FBgn0034397	CG15082	4.6397														FBgn0019968	Khc-73	1.25871		FBgn0035816	CG13685	-1.31101
					FBgn0034399	CG15083	3.22669														FBgn0039925	Kif3C	-1.19255		FBgn0031235	CG13693	-3.8981
					FBgn0034380	CG15087	-3.15783														FBgn0001325	Kr	-1.91654		FBgn0033482	CG1371	1.20764
					FBgn0034394	CG15096	3.39397														FBgn0034720	Liprin-gamma	-1.13029		FBgn0035553	CG13722	4.97845
					FBgn0034398	CG15098	3.03203														FBgn0032633	Lrch	-1.22561		FBgn0036717	CG13731	4.63469
					FBgn0034418	CG15118	1.61624														FBgn0032694	MESR3	2.3549		FBgn0031834	CG13766	-5.61263
					FBgn0032647	CG15143	-5.60992														FBgn0262741	MRE23	-1.58105		FBgn0031874	CG13775	-3.37771
					FBgn0027580	CG1516	2.15564														FBgn0262782	Mdh1	2.21975		FBgn0031939	CG13796	1.84381
					FBgn0032732	CG15168	-6.07614														FBgn0002719	Men	1.2605		FBgn0039068	CG13827	-5.20179
					FBgn0028526	CG15293	3.10901														FBgn0264695	Mhc	1.79586		FBgn0040588	CG13841	-2.19574
					FBgn0029989	CG15333	-7.08713														FBgn0053988	Mid1	1.45078		FBgn0038959	CG13856	2.71022
					FBgn0030260	CG1537	5.30761														FBgn0033438	Mmp2	2.85224		FBgn0035139	CG13891	-4.94026
					FBgn0031446	CG15398	-2.09121														FBgn0260660	Mp	-1.33557		FBgn0035161	CG13898	-5.07531
					FBgn0031504	CG15403	-6.36866														FBgn0002789	Mp20	2.068		FBgn0035164	CG13901	-5.8669
					FBgn0031132	CG15450	-3.35962														FBgn0085434	NaCP60E	-1.54508		FBgn0035286	CG13924	-5.20008
					FBgn0032867	CG15475	-5.6805														FBgn0028704	Nckx30C	1.76901		FBgn0033405	CG13954	-1.3268
					FBgn0032442	CG15485	-5.85998														FBgn0015774	NetB	2.2635		FBgn0032824	CG13962	-5.16551
					FBgn0039723	CG15522	-6.26108														FBgn0031866	Nlg2	-1.25376		FBgn0260452	CG13984	-5.69329
					FBgn0039804	CG15544	1.71253														FBgn0083975	Nlg4	-1.73989		FBgn0033212	CG1399	-1.14143
					FBgn0039806	CG15545	4.50047														FBgn0264975	Nrg	2.11141		FBgn0031753	CG13999	-2.95751
					FBgn0039807	CG15546	2.9142														FBgn0024944	Oamb	-1.31215		FBgn0031739	CG14005	-4.7108
					FBgn0030694	CG15602	-7.10381														FBgn0004514	Oct-TyrR	-1.47162		FBgn0031733	CG14006	-2.57214
					FBgn0030317	CG1561	2.1852														FBgn0038980	Octbeta1R	-1.67113		FBgn0029962	CG1402	-1.74127
					FBgn0031626	CG15631	-3.65445														FBgn0038063	Octbeta2R	3.56682		FBgn0032318	CG14072	-3.00591
					FBgn0030440	CG15719	-1.97782														FBgn0250910	Octbeta3R	-1.95991		FBgn0036818	CG14074	-1.91383
					FBgn0030309	CG1572	3.38373														FBgn0033404	Or45a	-1.70579		FBgn0036218	CG14128	-5.05624
					FBgn0030873	CG15814	2.92013														FBgn0034865	Or59b	3.5718		FBgn0036094	CG14153	1.72769
					FBgn0040528	CG15864	-6.14772														FBgn0034866	Or59c	3.30419		FBgn0036093	CG14154	-4.20197
					FBgn0033186	CG1602	-5.01684														FBgn0052406	PVRAP	-2.09825		FBgn0036931	CG14183	-2.85519
					FBgn0030468	CG1622	-2.23955														FBgn0036147	Plod	3.36475		FBgn0030996	CG14194	1.4061
					FBgn0031101	CG1631	-3.91422														FBgn0040752	Prosap	1.10847		FBgn0031037	CG14207	1.37114
					FBgn0033446	CG1648	2.23392														FBgn0004368	Ptp4E	2.03453		FBgn0031065	CG14234	-1.13462
					FBgn0031561	CG16712	3.3516														FBgn0261985	Ptpmeg	1.07911		FBgn0039467	CG14253	2.5372
					FBgn0029820	CG16721	1.4351														FBgn0085407	Pvf3	-1.51028		FBgn0039479	CG14257	-3.58292
					FBgn0030482	CG1673	2.54743														FBgn0264895	RapGAP1	1.42044		FBgn0040393	CG14265	-4.94821
					FBgn0029765	CG16756	-4.80567														FBgn0260943	Rbp6	2.67153		FBgn0029658	CG14269	-4.91973
					FBgn0029941	CG1677	1.08995														FBgn0011829	Ret	-2.45176		FBgn0032024	CG14273	-5.1215
					FBgn0032835	CG16772	3.60415														FBgn0264753	Rgk1	-1.55193		FBgn0032022	CG14275	2.027
					FBgn0029661	CG16781	-5.36713														FBgn0085426	Rgk3	3.06299		FBgn0038651	CG14299	1.33703
					FBgn0034974	CG16786	3.6639														FBgn0031118	RhoGAP19D	1.67242		FBgn0038629	CG14304	1.70563
					FBgn0038881	CG16791	-1.5848														FBgn0031359	Rim2	1.47099		FBgn0038540	CG14321	-5.8237
					FBgn0032488	CG16812	-5.29876														FBgn0259162	RunxB	-4.13519		FBgn0038102	CG14383	-1.50153
					FBgn0037728	CG16817	2.21466														FBgn0029761	SK	-1.53738		FBgn0030038	CG1440	1.86005
					FBgn0028482	CG16857	2.67214														FBgn0263236	SP1029	2.80627		FBgn0040352	CG14416	-4.85929
					FBgn0028544	CG16884	3.77716														FBgn0025391	Scgdelta	-2.34352		FBgn0040354	CG14418	-5.01811
					FBgn0032538	CG16885	2.41058														FBgn0264273	Sema-2b	2.49501		FBgn0029639	CG14419	2.35316
					FBgn0028938	CG16886	4.24979														FBgn0262593	Shab	-1.78138		FBgn0029643	CG14420	-6.54448
					FBgn0034480	CG16898	-5.60559														FBgn0085395	Shawl	-1.53114		FBgn0029880	CG14443	-4.30613
					FBgn0038809	CG16953	1.83323														FBgn0039938	Sox102F	2.75806		FBgn0037171	CG14459	-1.85677
					FBgn0036512	CG16979	-4.61344														FBgn0029123	SoxN	1.4249		FBgn0033000	CG14464	-1.8371
					FBgn0032109	CG17005	2.67371														FBgn0265045	Strn-Mlck	1.97515		FBgn0034284	CG14491	-4.72083
					FBgn0039972	CG17018	-5.47067														FBgn0037130	Syn1	1.33032		FBgn0034321	CG14502	-2.31353
					FBgn0036552	CG17028	-3.21752														FBgn0053094	Synd	1.0063		FBgn0034327	CG14505	-1.97057
					FBgn0035584	CG17030	-3.03644														FBgn0261090	Sytbeta	-1.78214		FBgn0039612	CG14523	-4.30044
					FBgn0032449	CG17036	-2.64775														FBgn0036341	Syx13	1.52979		FBgn0027578	CG14526	-1.81353
					FBgn0032285	CG17108	3.84158														FBgn0038165	Task6	-1.57332		FBgn0039613	CG14527	-5.79988
					FBgn0039051	CG17109	-3.2606														FBgn0010329	Tbh	-1.69946		FBgn0031955	CG14535	-1.43012
					FBgn0039050	CG17110	-3.53402														FBgn0037766	Teh1	-1.01679		FBgn0037149	CG14561	-5.61007
					FBgn0039048	CG17111	3.39709														FBgn0026760	Tehao	-2.11486		FBgn0287645	CG14579	-5.72653
					FBgn0036962	CG17122	-7.48676														FBgn0267001	Ten-a	-1.2585		FBgn0033063	CG14589	-3.57476
					FBgn0032304	CG17134	-6.00941														FBgn0262473	Tl	-1.1994		FBgn0037487	CG14608	2.66634
					FBgn0031164	CG1724	-4.76364														FBgn0036494	Toll-6	-1.49287		FBgn0040361	CG14627	-6.77326
					FBgn0031496	CG17258	-4.10647														FBgn0051721	Trim9	-1.54456		FBgn0037288	CG14661	3.75626
					FBgn0031497	CG17259	-3.32992														FBgn0038542	TyrR	-1.71286		FBgn0030157	CG1468	3.40694
					FBgn0038879	CG17298	5.8521														FBgn0053519	Unc-89	1.85712		FBgn0037822	CG14683	2.41126
					FBgn0259979	CG17337	1.84321														FBgn0263511	Vsx1	-2.71521		FBgn0037835	CG14687	3.63927
					FBgn0036396	CG17359	-5.87624														FBgn0052677	X11Lbeta	1.34519		FBgn0037836	CG14692	-3.20093
					FBgn0036391	CG17364	-1.2591														FBgn0264442	ab	-1.32766		FBgn0037942	CG14721	-6.39781
					FBgn0039830	CG1746	2.09643														FBgn0039332	alrm	2.03347		FBgn0033307	CG14752	5.21412
					FBgn0261387	CG17528	-1.26011														FBgn0000114	aret	-1.415		FBgn0033275	CG14756	-5.20439
					FBgn0032774	CG17549	2.52476														FBgn0067783	att-ORFA	2.24153		FBgn0029573	CG14770	4.24358
					FBgn0038449	CG17562	16.8933														FBgn0011300	babo	1.3021		FBgn0029587	CG14797	-1.82668
					FBgn0032763	CG17568	-2.61629														FBgn0053179	beat-IIIb	-1.59615		FBgn0029590	CG14811	-5.48065
					FBgn0033777	CG17574	2.05265														FBgn0032629	beat-IIIc	-2.12287		FBgn0035755	CG14830	3.30383
					FBgn0031194	CG17598	-1.64659														FBgn0038498	beat-IIa	2.11577		FBgn0035797	CG14837	-3.86228
					FBgn0264494	CG17646	1.42248														FBgn0038494	beat-IIb	2.24068		FBgn0038419	CG14879	-4.23038
					FBgn0031356	CG17660	1.5577														FBgn0039089	beat-IV	-1.65281		FBgn0038422	CG14880	2.53042
					FBgn0034352	CG17669	-6.5433														FBgn0028645	beat-Ib	-1.54666		FBgn0038445	CG14891	-5.18338
					FBgn0262115	CG17683	-1.4788														FBgn0028644	beat-Ic	-2.11287		FBgn0015351	CG14906	-6.43139
					FBgn0263780	CG17684	-1.38176														FBgn0039584	beat-VI	-1.81524		FBgn0032360	CG14926	6.40309
					FBgn0036923	CG17732	-18.7326														FBgn0250908	beat-VII	-1.13429		FBgn0031169	CG1494	-2.54238
					FBgn0033710	CG17739	2.42961														FBgn0038087	beat-Va	-2.21225		FBgn0035439	CG14961	2.06292
					FBgn0039167	CG17786	-1.54768														FBgn0038092	beat-Vb	-1.72769		FBgn0035410	CG14964	2.53353
					FBgn0038549	CG17802	-2.81386														FBgn0038084	beat-Vc	-2.06397		FBgn0035480	CG14984	2.285
					FBgn0038547	CG17803	-2.62376														FBgn0000179	bi	-1.8543		FBgn0035495	CG14989	1.41107
					FBgn0034748	CG17807	-6.89811														FBgn0011211	blw	1.19579		FBgn0035496	CG14990	-4.89447
					FBgn0034383	CG17821	-3.05802														FBgn0283451	br	-1.4662		FBgn0035508	CG15005	-1.44211
					FBgn0036454	CG17839	1.20418														FBgn0259246	brp	-1.40871		FBgn0035544	CG15021	3.73893
					FBgn0040005	CG17883	-1.58062														FBgn0027598	cindr	1.47304		FBgn0029949	CG15035	-6.56238
					FBgn0030163	CG1791	3.40394														FBgn0033987	ckn	1.57378		FBgn0031100	CG1504	-2.40722
					FBgn0037433	CG17919	2.61329														FBgn0037015	cmpy	-1.56322		FBgn0030938	CG15047	-3.79689
					FBgn0029647	CG17959	-4.50019														FBgn0000395	cv-2	-1.92581		FBgn0034331	CG15067	3.89604
					FBgn0033199	CG17985	2.35176														FBgn0263930	dally	1.13435		FBgn0034377	CG15071	-2.63454
					FBgn0028856	CG18063	-3.28942														FBgn0260866	dnr1	1.89202		FBgn0034391	CG15080	2.78968
					FBgn0034512	CG18067	3.82796														FBgn0052057	dpr10	-1.45954		FBgn0034394	CG15096	2.16275
					FBgn0032791	CG18094	-5.51746														FBgn0053202	dpr11	-1.25337		FBgn0034398	CG15098	2.61853
					FBgn0031119	CG1812	-2.08915														FBgn0085414	dpr12	-1.43497		FBgn0034418	CG15118	1.13736
					FBgn0265268	CG18234	-5.77237														FBgn0034286	dpr13	-1.57556		FBgn0032647	CG15143	2.94845
					FBgn0030403	CG1824	2.41837														FBgn0037993	dpr15	-1.68292		FBgn0027580	CG1516	2.47043
					FBgn0037003	CG18281	-2.59573														FBgn0037295	dpr16	1.79332		FBgn0037449	CG15185	-4.36563
					FBgn0034206	CG18469	-3.36542														FBgn0051361	dpr17	-1.58587		FBgn0030296	CG15196	-2.80538
					FBgn0038701	CG18493	-5.37279														FBgn0261871	dpr2	-2.00762		FBgn0030272	CG15201	2.13856
					FBgn0034322	CG18536	-2.60603														FBgn0040823	dpr6	-1.85567		FBgn0033076	CG15233	-2.85273
					FBgn0034323	CG18537	-3.73188														FBgn0052600	dpr8	-1.36591		FBgn0028531	CG15286	-6.07387
					FBgn0038953	CG18596	-1.94605														FBgn0038282	dpr9	-1.3853		FBgn0028526	CG15293	2.53621
					FBgn0030164	CG1889	3.1146														FBgn0015380	drl	-1.83673		FBgn0040719	CG15357	-4.69838
					FBgn0022349	CG1910	1.09147														FBgn0260634	eIF4G2	1.0951		FBgn0030889	CG15373	-2.30569
					FBgn0027547	CG1927	2.50779														FBgn0000535	eag	-1.4126		FBgn0031403	CG15387	-5.69931
					FBgn0039909	CG1970	1.31803														FBgn0000320	eya	-1.43595		FBgn0031446	CG15398	-5.86609
					FBgn0039667	CG2010	2.84511														FBgn0033859	fas	-1.29533		FBgn0031542	CG15414	2.9272
					FBgn0030223	CG2111	-1.94623														FBgn0000659	fkh	-2.11655		FBgn0031132	CG15450	-3.32757
					FBgn0030005	CG2120	-6.32635														FBgn0263773	fok	1.48864		FBgn0040649	CG15461	-4.73099
					FBgn0032957	CG2225	-1.60196														FBgn0051774	fred	-1.97924		FBgn0032867	CG15475	-7.13388
					FBgn0029990	CG2233	2.44174														FBgn0004652	fru	1.64149		FBgn0029955	CG15478	-5.04656
					FBgn0029994	CG2254	3.04946														FBgn0045852	ham	-2.99806		FBgn0039686	CG15506	3.23052
					FBgn0039792	CG2267	-15.9102														FBgn0008636	hbn	4.30158		FBgn0030258	CG1552	2.68483
					FBgn0030323	CG2371	-5.90266														FBgn0010113	hdc	1.76846		FBgn0039727	CG15523	1.37305
					FBgn0030326	CG2444	-5.29332														FBgn0032129	jp	1.71076		FBgn0039742	CG15528	-3.87312
					FBgn0037298	CG2604	1.94764														FBgn0015396	jumu	-1.54017		FBgn0039766	CG15536	-5.53836
					FBgn0032873	CG2614	-2.46559														FBgn0263973	jv	-1.07403		FBgn0039807	CG15546	3.25328
					FBgn0037518	CG2641	3.93521														FBgn0015399	kek1	-1.70288		FBgn0039812	CG15548	-3.28969
					FBgn0024995	CG2680	-5.69458														FBgn0015400	kek2	1.27809		FBgn0030317	CG1561	2.2021
					FBgn0035090	CG2736	2.24507														FBgn0028370	kek3	1.62318		FBgn0031626	CG15631	-2.67772
					FBgn0037534	CG2781	2.22719														FBgn0017590	klg	-1.70248		FBgn0028943	CG15638	-4.99639
					FBgn0029672	CG2875	-2.22227														FBgn0015721	ktub	-1.93716		FBgn0034605	CG15661	2.6035
					FBgn0033241	CG2915	2.9627														FBgn0261574	kug	1.44727		FBgn0029993	CG1571	-4.41597
					FBgn0034689	CG2921	-4.84909														FBgn0037163	laza	-1.56587		FBgn0030440	CG15719	-3.29553
					FBgn0037342	CG2931	-5.86876														FBgn0040765	luna	-1.17985		FBgn0030309	CG1572	1.96703
					FBgn0029685	CG2938	-2.58168														FBgn0019985	mGluR	-1.16344		FBgn0030508	CG15760	-1.85135
					FBgn0260474	CG30002	4.48577														FBgn0265487	mbl	-1.71208		FBgn0029809	CG15767	-4.28528
					FBgn0050026	CG30026	4.71918														FBgn0002709	mei-218	-3.54711		FBgn0029712	CG15912	-4.97084
					FBgn0050065	CG30065	-2.50942														FBgn0020269	mspo	-1.85831		FBgn0033191	CG1598	2.16413
					FBgn0050069	CG30069	2.53484														FBgn0013686	mt:lrRNA	4.26844		FBgn0030218	CG1628	-2.75111
					FBgn0050094	CG30094	4.2091														FBgn0045442	mthl12	15.5687		FBgn0030478	CG1640	1.14282
					FBgn0050108	CG30108	-6.28301														FBgn0050361	mtt	-1.60744		FBgn0033446	CG1648	1.82874
					FBgn0050109	CG30109	-6.11461														FBgn0000036	nAChRalpha1	-1.38806		FBgn0030286	CG1657	1.24403
					FBgn0037519	CG3014	-4.72701														FBgn0015519	nAChRalpha3	-1.88695		FBgn0031561	CG16712	3.09647
					FBgn0050156	CG30156	-3.34255														FBgn0032151	nAChRalpha6	-1.74016		FBgn0034459	CG16716	-2.21291
					FBgn0050197	CG30197	2.62764														FBgn0086778	nAChRalpha7	2.0357		FBgn0029820	CG16721	1.93443
					FBgn0050272	CG30272	-21.4786														FBgn0016919	nompB	-2.39512		FBgn0030482	CG1673	2.46965
					FBgn0050278	CG30278	6.64273														FBgn0262509	nrm	-1.44832		FBgn0029765	CG16756	3.1472
					FBgn0260477	CG30283	-3.85005														FBgn0002973	numb	-1.02612		FBgn0032779	CG16771	-2.25204
					FBgn0050285	CG30285	3.17572														FBgn0005636	nvy	-2.05353		FBgn0032835	CG16772	4.00462
					FBgn0029928	CG3032	-5.90464														FBgn0004102	oc	3.53104		FBgn0029661	CG16781	-5.01751
					FBgn0050338	CG30338	-5.34365														FBgn0037153	olf413	-1.28611		FBgn0034974	CG16786	3.74869
					FBgn0050340	CG30340	-6.81946														FBgn0259175	ome	3.65969		FBgn0034940	CG16787	-4.751
					FBgn0050356	CG30356	-3.09625														FBgn0004882	orb	5.85291		FBgn0038881	CG16791	-1.4918
					FBgn0050357	CG30357	-7.30326														FBgn0003011	ort	3.3461		FBgn0037728	CG16817	1.82602
					FBgn0031645	CG3036	2.96261														FBgn0264908	pHCl	1.59824		FBgn0032503	CG16825	-3.40693
					FBgn0050378	CG30378	-3.92672														FBgn0285944	para	2.03405		FBgn0028941	CG16853	-3.86283
					FBgn0050379	CG30379	-5.13475														FBgn0283685	pog	-1.67247		FBgn0028482	CG16857	2.78244
					FBgn0050401	CG30401	-5.51909														FBgn0004595	pros	-1.38407		FBgn0034498	CG16868	-1.41882
					FBgn0050424	CG30424	-3.54086														FBgn0003165	pum	2.03432		FBgn0028544	CG16884	3.95957
					FBgn0050428	CG30428	-1.44455														FBgn0053207	pxb	-2.00395		FBgn0032538	CG16885	3.13698
					FBgn0050487	CG30487	7.23923														FBgn0265597	rad	-1.33715		FBgn0028938	CG16886	4.47194
					FBgn0029608	CG3091	3.04138														FBgn0243486	rdo	-1.44748		FBgn0028932	CG16890	-5.16493
					FBgn0051068	CG31068	-3.72465														FBgn0004635	rho	-1.52174		FBgn0031816	CG16947	3.66469
					FBgn0051088	CG31088	-3.40959														FBgn0003285	rst	-1.53844		FBgn0038809	CG16953	1.79448
					FBgn0051100	CG31100	2.24623														FBgn0003300	run	-4.51469		FBgn0032387	CG16965	5.72715
					FBgn0051103	CG31103	3.66094														FBgn0261873	sdt	1.11936		FBgn0032109	CG17005	2.00273
					FBgn0051111	CG31111	-6.28449														FBgn0085387	shakB	-1.92789		FBgn0039972	CG17018	-2.97886
					FBgn0051115	CG31115	-4.22524														FBgn0016061	side	-1.80425		FBgn0036552	CG17028	-2.07349
					FBgn0051121	CG31121	3.23779														FBgn0003423	slgA	1.79071		FBgn0035584	CG17030	-5.94795
					FBgn0051125	CG31125	-5.47364														FBgn0003447	sn	-1.18984		FBgn0036547	CG17032	3.63585
					FBgn0051195	CG31195	1.53523														FBgn0086030	snoRNA:Me18S-G393	2.98219		FBgn0032449	CG17036	-5.46971
					FBgn0051202	CG31202	-6.19001														FBgn0039232	sosie	-1.7672		FBgn0033828	CG17048	-3.77906
					FBgn0051205	CG31205	4.75517														FBgn0052382	sphinx2	-2.96917		FBgn0031098	CG17068	-4.66498
					FBgn0286852	CG31235	-2.71692														FBgn0003513	ss	-2.07873		FBgn0031239	CG17075	-1.193
					FBgn0051244	CG31244	-7.14921														FBgn0029157	ssh	1.19473		FBgn0040496	CG17104	3.60656
					FBgn0051313	CG31313	5.14626														FBgn0086704	stops	1.3462		FBgn0032285	CG17108	3.69917
					FBgn0051321	CG31321	2.61046														FBgn0052518	tRNA:CR32518:Psi	2.368		FBgn0039051	CG17109	-1.94658
					FBgn0051345	CG31345	-2.80825														FBgn0261649	tinc	-1.05771		FBgn0039050	CG17110	-1.9547
					FBgn0051414	CG31414	3.40891														FBgn0028979	tio	-1.84446		FBgn0039043	CG17121	3.60843
					FBgn0051547	CG31547	3.45776														FBgn0026160	tna	1.65945		FBgn0036962	CG17122	-5.18849
					FBgn0051549	CG31549	-5.50912														FBgn0004885	tok	2.83145		FBgn0032304	CG17134	-6.14196
					FBgn0051606	CG31606	-2.06499														FBgn0019650	toy	-1.56301		FBgn0036447	CG17173	-5.76984
					FBgn0051612	CG31612	-2.87198														FBgn0010452	trn	3.43214		FBgn0039473	CG17191	-4.64341
					FBgn0025683	CG3164	2.0908														FBgn0284408	trol	2.07849		FBgn0038775	CG17199	-6.57907
					FBgn0051676	CG31676	4.00898														FBgn0035756	unc-13-4A	-1.4423		FBgn0032414	CG17211	2.2387
					FBgn0051677	CG31677	-4.41661														FBgn0053200	ventrally-expressed-protein-D	2.85508		FBgn0031168	CG1722	-1.47459
					FBgn0029896	CG3168	1.81295														FBgn0259789	vfl	-1.74789		FBgn0031164	CG1724	-3.26162
					FBgn0263355	CG31688	-1.50974														FBgn0016075	vkg	1.99517		FBgn0039031	CG17244	2.16622
					FBgn0031449	CG31689	2.02375														FBgn0266418	wake	-1.27221		FBgn0031498	CG17260	-5.40852
					FBgn0028490	CG31705	3.13715														FBgn0004607	zfh2	-1.18227		FBgn0038879	CG17298	4.25863
					FBgn0051708	CG31708	-1.5786																		FBgn0039915	CG1732	1.37151
					FBgn0051769	CG31769	2.26388																		FBgn0027074	CG17324	4.27858
					FBgn0051773	CG31773	-2.45291																		FBgn0028895	CG17328	-4.26191
					FBgn0051776	CG31776	-4.15921																		FBgn0036396	CG17359	-5.047
					FBgn0051778	CG31778	2.53935																		FBgn0036393	CG17362	-5.48807
					FBgn0051798	CG31798	-4.65552																		FBgn0031859	CG17377	5.92428
					FBgn0051802	CG31802	-6.84906																		FBgn0039830	CG1746	2.09733
					FBgn0051832	CG31832	-4.18941																		FBgn0040009	CG17490	-1.33382
					FBgn0051861	CG31861	-4.04905																		FBgn0039970	CG17508	-1.20324
					FBgn0032122	CG31883	-1.55682																		FBgn0032774	CG17549	2.93157
					FBgn0051897	CG31897	-2.75272																		FBgn0038449	CG17562	22.2969
					FBgn0051910	CG31910	-2.73862																		FBgn0033777	CG17574	1.37773
					FBgn0051952	CG31952	-2.43261																		FBgn0031597	CG17612	-1.88575
					FBgn0051997	CG31997	2.3033																		FBgn0037004	CG17637	-2.66987
					FBgn0052068	CG32068	2.89018																		FBgn0264494	CG17646	1.16628
					FBgn0052082	CG32082	2.70466																		FBgn0036311	CG17666	5.30945
					FBgn0052087	CG32087	-5.94172																		FBgn0034352	CG17669	-6.67586
					FBgn0052091	CG32091	2.0795																		FBgn0263780	CG17684	-1.75939
					FBgn0052112	CG32112	-1.87921																		FBgn0040056	CG17698	-1.01919
					FBgn0052113	CG32113	1.41536																		FBgn0037890	CG17734	1.76569
					FBgn0052121	CG32121	2.74943																		FBgn0039856	CG1774	4.6829
					FBgn0267795	CG32138	1.49674																		FBgn0035730	CG17744	-3.2455
					FBgn0052161	CG32161	-4.00331																		FBgn0039167	CG17786	-1.13026
					FBgn0052202	CG32202	-5.7258																		FBgn0034383	CG17821	-3.40054
					FBgn0052204	CG32204	-1.58671																		FBgn0036454	CG17839	1.05566
					FBgn0052206	CG32206	-1.10663																		FBgn0028480	CG17841	1.18431
					FBgn0052219	CG32219	-2.36821																		FBgn0040005	CG17883	-1.60032
					FBgn0052225	CG32225	-1.86991																		FBgn0030163	CG1791	4.65176
					FBgn0052243	CG32243	-1.75032																		FBgn0037433	CG17919	2.80501
					FBgn0052246	CG32246	-2.75126																		FBgn0038416	CG17930	-2.41846
					FBgn0031631	CG3225	-2.62406																		FBgn0038421	CG17931	-2.9775
					FBgn0052259	CG32259	-3.824																		FBgn0029647	CG17959	-6.01287
					FBgn0052271	CG32271	-5.88837																		FBgn0039498	CG17991	-5.81827
					FBgn0052344	CG32344	1.90568																		FBgn0061356	CG18003	2.84764
					FBgn0052396	CG32396	-3.23601																		FBgn0028856	CG18063	-1.95331
					FBgn0052425	CG32425	-1.53726																		FBgn0034512	CG18067	3.56076
					FBgn0052450	CG32450	-1.78175																		FBgn0031119	CG1812	-1.82475
					FBgn0052457	CG32457	-6.33457																		FBgn0035262	CG18171	-2.09737
					FBgn0052506	CG32506	-1.13503																		FBgn0036795	CG18233	-4.1602
					FBgn0052507	CG32507	-3.50551																		FBgn0037003	CG18281	-2.1595
					FBgn0041706	CG3253	-6.30444																		FBgn0030269	CG18292	-2.41796
					FBgn0052537	CG32537	-3.22634																		FBgn0031869	CG18304	3.35058
					FBgn0052547	CG32547	-1.38216																		FBgn0033864	CG18368	-3.26993
					FBgn0052638	CG32638	2.58943																		FBgn0033893	CG18371	-4.86377
					FBgn0052639	CG32639	-6.25691																		FBgn0033285	CG18449	-2.45344
					FBgn0052668	CG32668	-2.32035																		FBgn0028527	CG18507	1.89778
					FBgn0052669	CG32669	-3.03442																		FBgn0034322	CG18536	-3.2796
					FBgn0052732	CG32732	-3.73045																		FBgn0034323	CG18537	-2.16012
					FBgn0052797	CG32797	-3.9143																		FBgn0034324	CG18538	-4.30077
					FBgn0023531	CG32809	-1.18004																		FBgn0034325	CG18539	-2.56014
					FBgn0260741	CG3281	-6.00621																		FBgn0038053	CG18549	-1.51669
					FBgn0052814	CG32814	-2.58733																		FBgn0032639	CG18563	-5.85572
					FBgn0052815	CG32815	-1.29062																		FBgn0034382	CG18609	-5.13014
					FBgn0052845	CG32845	-2.80339																		FBgn0040964	CG18661	-5.04531
					FBgn0038878	CG3301	3.11918																		FBgn0042126	CG18788	-4.5088
					FBgn0053052	CG33052	-4.40184																		FBgn0042132	CG18809	-1.40225
					FBgn0053056	CG33056	1.45764																		FBgn0033421	CG1888	-1.82575
					FBgn0038877	CG3308	2.47205																		FBgn0030164	CG1889	2.86709
					FBgn0053107	CG33107	-5.42495																		FBgn0027547	CG1927	2.00696
					FBgn0053108	CG33108	-5.7282																		FBgn0029940	CG1958	-7.15526
					FBgn0053110	CG33110	2.81494																		FBgn0039909	CG1970	1.2681
					FBgn0053191	CG33191	-5.5769																		FBgn0026563	CG1979	2.52453
					FBgn0053233	CG33233	-2.44365																		FBgn0039664	CG2006	-4.85977
					FBgn0053285	CG33285	-7.00428																		FBgn0039667	CG2010	3.53201
					FBgn0053306	CG33306	-6.0965																		FBgn0037376	CG2051	-4.31858
					FBgn0053307	CG33307	-2.71675																		FBgn0039887	CG2053	-4.45577
					FBgn0053310	CG33310	-2.55361																		FBgn0037372	CG2091	-3.81051
					FBgn0053476	CG33476	-6.13836																		FBgn0037365	CG2104	-3.00173
					FBgn0053477	CG33477	-4.62098																		FBgn0030223	CG2111	-4.60781
					FBgn0040609	CG3348	4.84252																		FBgn0030003	CG2116	-2.9531
					FBgn0053543	CG33543	-1.4985																		FBgn0039877	CG2118	1.41924
					FBgn0053635	CG33635	-5.1899																		FBgn0030251	CG2145	1.67721
					FBgn0053639	CG33639	-1.68544																		FBgn0003065	CG2150	7.03256
					FBgn0053640	CG33640	-2.46819																		FBgn0030441	CG2209	-4.27737
					FBgn0053643	CG33643	-2.12784																		FBgn0032957	CG2225	-1.05384
					FBgn0053644	CG33644	-2.30593																		FBgn0029990	CG2233	2.51331
					FBgn0053723	CG33723	-5.00928																		FBgn0029994	CG2254	2.72141
					FBgn0053914	CG33914	-6.22475																		FBgn0033484	CG2269	1.68952
					FBgn0053927	CG33927	-2.0339																		FBgn0033479	CG2292	-3.52502
					FBgn0053970	CG33970	2.16922																		FBgn0037455	CG2336	-3.37071
					FBgn0054001	CG34001	4.56651																		FBgn0032969	CG2528	5.92281
					FBgn0054026	CG34026	-4.47085																		FBgn0032873	CG2614	-3.76386
					FBgn0054030	CG34030	-4.36436																		FBgn0024975	CG2712	-4.6764
					FBgn0054056	CG34056	2.54675																		FBgn0035090	CG2736	2.24895
					FBgn0083949	CG34113	-1.0215																		FBgn0037534	CG2781	1.75521
					FBgn0083950	CG34114	-1.35005																		FBgn0031566	CG2818	1.31446
					FBgn0083956	CG34120	3.03023																		FBgn0028491	CG2930	2.8547
					FBgn0083963	CG34127	-1.46332																		FBgn0037342	CG2931	-4.1909
					FBgn0083969	CG34133	-2.20996																		FBgn0029686	CG2941	-2.07091
					FBgn0083972	CG34136	2.95169																		FBgn0050008	CG30008	-2.68672
					FBgn0085198	CG34169	-6.31609																		FBgn0050056	CG30056	-5.5146
					FBgn0085217	CG34188	-2.03147																		FBgn0050065	CG30065	-2.2133
					FBgn0085218	CG34189	-2.23899																		FBgn0050069	CG30069	2.75657
					FBgn0085242	CG34213	-5.51627																		FBgn0050076	CG30076	-6.88462
					FBgn0085246	CG34217	3.82605																		FBgn0029823	CG3011	4.55749
					FBgn0085256	CG34227	4.4664																		FBgn0050110	CG30110	-1.95817
					FBgn0085263	CG34234	-5.63502																		FBgn0284257	CG30118	1.10379
					FBgn0085285	CG34256	-6.33238																		FBgn0050156	CG30156	-2.22198
					FBgn0085316	CG34287	-5.38043																		FBgn0050178	CG30178	-4.54599
					FBgn0085322	CG34293	-3.76632																		FBgn0050197	CG30197	1.90304
					FBgn0085354	CG34325	2.38784																		FBgn0050271	CG30271	-3.86486
					FBgn0085356	CG34327	5.29495																		FBgn0050284	CG30284	-3.376
					FBgn0263829	CG34334	-3.58949																		FBgn0029928	CG3032	-6.0372
					FBgn0036000	CG3434	-5.58428																		FBgn0050325	CG30325	-3.77301
					FBgn0085382	CG34353	-2.2841																		FBgn0050338	CG30338	-5.47621
					FBgn0085383	CG34354	-1.24781																		FBgn0050355	CG30355	-2.25677
					FBgn0085385	CG34356	-1.45194																		FBgn0050356	CG30356	-3.47526
					FBgn0031229	CG3436	-7.67713																		FBgn0031645	CG3036	1.71914
					FBgn0085400	CG34371	-1.3634																		FBgn0050378	CG30378	-3.78449
					FBgn0085420	CG34391	-1.28437																		FBgn0050379	CG30379	-5.26731
					FBgn0085427	CG34398	1.82774																		FBgn0050401	CG30401	-5.18926
					FBgn0085431	CG34402	-4.11604																		FBgn0034703	CG3045	-3.84688
					FBgn0085446	CG34417	2.57866																		FBgn0287631	CG30456	2.28501
					FBgn0085459	CG34430	-2.69048																		FBgn0050495	CG30495	-3.16919
					FBgn0250833	CG34461	4.60743																		FBgn0050496	CG30496	-3.67408
					FBgn0035008	CG3494	-4.70903																		FBgn0034946	CG3065	-1.98717
					FBgn0038706	CG3517	-4.55005																		FBgn0051007	CG31007	-4.72268
					FBgn0034859	CG3520	-4.2078																		FBgn0031473	CG3104	-1.39323
					FBgn0283427	CG3523	1.96152																		FBgn0051077	CG31077	-4.1149
					FBgn0040355	CG3526	-6.71064																		FBgn0029807	CG3108	-5.85643
					FBgn0038463	CG3534	2.19687																		FBgn0051088	CG31088	-2.78141
					FBgn0029710	CG3568	-2.56333																		FBgn0051100	CG31100	1.69575
					FBgn0025643	CG3588	2.23255																		FBgn0051103	CG31103	2.5064
					FBgn0035065	CG3589	4.4804																		FBgn0051176	CG31176	1.8484
					FBgn0029642	CG3592	-5.81601																		FBgn0051189	CG31189	3.80265
					FBgn0023540	CG3630	2.83978																		FBgn0051205	CG31205	3.34655
					FBgn0037026	CG3634	-1.96538																		FBgn0031465	CG3123	-5.0737
					FBgn0040346	CG3704	-5.8538																		FBgn0051244	CG31244	-6.31997
					FBgn0031227	CG3709	-5.58014																		FBgn0051245	CG31245	-5.12937
					FBgn0040343	CG3713	-1.28785																		FBgn0051300	CG31300	3.41934
					FBgn0038271	CG3731	2.64586																		FBgn0051313	CG31313	2.5266
					FBgn0038700	CG3734	-4.89818																		FBgn0051320	CG31320	-1.84926
					FBgn0036684	CG3764	1.41733																		FBgn0051324	CG31324	-1.02652
					FBgn0024989	CG3777	2.55236																		FBgn0051327	CG31327	4.66172
					FBgn0029853	CG3781	-5.44767																		FBgn0051343	CG31343	5.66718
					FBgn0035091	CG3829	2.47763																		FBgn0051347	CG31347	-4.92666
					FBgn0023507	CG3835	1.98341																		FBgn0051407	CG31407	-6.57354
					FBgn0029866	CG3842	2.90336																		FBgn0051414	CG31414	3.85443
					FBgn0031571	CG3921	2.49074																		FBgn0051510	CG31510	-1.35332
					FBgn0036821	CG3961	1.79879																		FBgn0051522	CG31522	1.69135
					FBgn0037801	CG3999	2.78539																		FBgn0051526	CG31526	-3.11364
					FBgn0038820	CG4000	3.7098																		FBgn0051538	CG31538	-2.05251
					FBgn0030418	CG4004	-2.38783																		FBgn0051547	CG31547	1.78986
					FBgn0287183	CG40178	-2.13984																		FBgn0051606	CG31606	-1.87115
					FBgn0037018	CG4042	-4.58947																		FBgn0034961	CG3163	-6.96966
					FBgn0069969	CG40498	-1.10841																		FBgn0025683	CG3164	1.87202
					FBgn0038011	CG4066	6.43255																		FBgn0051642	CG31642	-4.05441
					FBgn0038300	CG4203	-4.03496																		FBgn0051663	CG31663	1.69493
					FBgn0031251	CG4213	3.21575																		FBgn0051676	CG31676	2.53993
					FBgn0250862	CG42237	-5.86228																		FBgn0051677	CG31677	-4.14455
					FBgn0259164	CG42269	2.33383																		FBgn0029896	CG3168	2.04221
					FBgn0259183	CG42287	-1.55789																		FBgn0263355	CG31688	-2.04017
					FBgn0259184	CG42288	-1.70407																		FBgn0031449	CG31689	1.79277
					FBgn0031683	CG4230	-1.70333																		FBgn0051690	CG31690	-1.56133
					FBgn0259219	CG42319	2.83169																		FBgn0051697	CG31697	-5.321
					FBgn0259227	CG42327	1.72901																		FBgn0028490	CG31705	3.17388
					FBgn0259233	CG42331	3.99622																		FBgn0051706	CG31706	2.28002
					FBgn0259239	CG42337	-1.19483																		FBgn0051708	CG31708	-1.44207
					FBgn0259241	CG42339	-1.80548																		FBgn0051769	CG31769	2.49819
					FBgn0259245	CG42343	-1.28716																		FBgn0051773	CG31773	-2.69639
					FBgn0259716	CG42370	-3.90058																		FBgn0051776	CG31776	-2.98799
					FBgn0259736	CG42390	3.34253																		FBgn0051798	CG31798	-3.77708
					FBgn0259823	CG42404	-1.39759																		FBgn0051805	CG31805	-3.46291
					FBgn0259992	CG42489	-5.00117																		FBgn0051815	CG31815	-3.03946
					FBgn0260007	CG42493	-3.34005																		FBgn0028899	CG31817	-1.88351
					FBgn0260429	CG42524	-2.12753																		FBgn0051820	CG31820	-3.71966
					FBgn0260431	CG42526	-5.30688																		FBgn0051832	CG31832	-5.22434
					FBgn0261562	CG42676	-2.94252																		FBgn0051861	CG31861	-3.51366
					FBgn0261564	CG42678	1.44449																		FBgn0051870	CG31870	-5.98627
					FBgn0261625	CG42708	-1.68213																		FBgn0032122	CG31883	-4.06832
					FBgn0261698	CG42732	-1.02094																		FBgn0051907	CG31907	-3.33107
					FBgn0261686	CG42733	-6.83565																		FBgn0051910	CG31910	-7.07421
					FBgn0261801	CG42747	-2.42604																		FBgn0031678	CG31918	-4.40844
					FBgn0261834	CG42766	-4.94044																		FBgn0051921	CG31921	-2.3517
					FBgn0263354	CG42784	-1.6225																		FBgn0051952	CG31952	-3.1703
					FBgn0261990	CG42808	4.95266																		FBgn0038210	CG3199	-5.25248
					FBgn0262035	CG42846	-4.47008																		FBgn0051997	CG31997	2.69056
					FBgn0262358	CG43056	-2.81201																		FBgn0052006	CG32006	-4.12566
					FBgn0262482	CG43072	-2.80247																		FBgn0052022	CG32022	-6.03928
					FBgn0262508	CG43078	1.7136																		FBgn0052068	CG32068	2.48561
					FBgn0262539	CG43093	-1.63206																		FBgn0052082	CG32082	2.0352
					FBgn0262568	CG43108	-3.16555																		FBgn0034971	CG3209	1.08697
					FBgn0262583	CG43123	-3.5437																		FBgn0052091	CG32091	1.88869
					FBgn0262679	CG43149	-7.81462																		FBgn0052110	CG32110	-2.36142
					FBgn0262854	CG43218	-1.42567																		FBgn0052113	CG32113	1.25202
					FBgn0036274	CG4328	-3.56727																		FBgn0052121	CG32121	2.86674
					FBgn0263027	CG43322	-5.39366																		FBgn0047338	CG32148	-3.09986
					FBgn0263029	CG43324	-2.2066																		FBgn0052192	CG32192	-2.30931
					FBgn0263035	CG43330	-2.11231																		FBgn0052199	CG32199	-5.13547
					FBgn0263042	CG43337	-5.88101																		FBgn0052201	CG32201	-6.00922
					FBgn0263077	CG43340	1.34179																		FBgn0052202	CG32202	-4.89656
					FBgn0263072	CG43347	-1.17241																		FBgn0052204	CG32204	-1.35917
					FBgn0263083	CG43351	-2.56914																		FBgn0052206	CG32206	-1.2741
					FBgn0263270	CG43396	-3.29716																		FBgn0036014	CG3222	-5.16271
					FBgn0263776	CG43693	2.1452																		FBgn0052225	CG32225	-1.88105
					FBgn0263846	CG43707	-1.36108																		FBgn0037538	CG3223	2.10778
					FBgn0263999	CG43742	-3.75695																		FBgn0052232	CG32232	-2.11415
					FBgn0264090	CG43759	-1.7676																		FBgn0031631	CG3225	-3.44236
					FBgn0264489	CG43897	3.34643																		FBgn0052259	CG32259	-5.1465
					FBgn0264543	CG43922	-5.87612																		FBgn0029882	CG3226	-4.55299
					FBgn0264566	CG43938	-5.05083																		FBgn0052262	CG32262	-3.90577
					FBgn0264711	CG43980	2.6107																		FBgn0052277	CG32277	-4.5978
					FBgn0264739	CG43997	-3.25012																		FBgn0052281	CG32281	-3.93757
					FBgn0264750	CG44008	-2.62042																		FBgn0260480	CG32295	-3.39378
					FBgn0023545	CG4406	-5.21015																		FBgn0052350	CG32350	-2.39373
					FBgn0264907	CG44098	-1.21871																		FBgn0043783	CG32444	3.72124
					FBgn0265084	CG44195	1.97267																		FBgn0052450	CG32450	-2.09117
					FBgn0265185	CG44250	6.28559																		FBgn0052452	CG32452	-2.84001
					FBgn0265257	CG44271	-6.89531																		FBgn0260481	CG32454	-6.12052
					FBgn0265373	CG44314	-5.22131																		FBgn0052457	CG32457	-4.73802
					FBgn0032115	CG4438	-5.86521																		FBgn0052459	CG32459	3.92233
					FBgn0265579	CG44406	-5.89335																		FBgn0031538	CG3246	3.01488
					FBgn0265595	CG44422	-1.04811																		FBgn0052473	CG32473	1.42813
					FBgn0265714	CG44521	-3.70318																		FBgn0052485	CG32485	-1.95696
					FBgn0028506	CG4455	2.56234																		FBgn0052506	CG32506	-1.41465
					FBgn0038753	CG4459	-5.46194																		FBgn0052507	CG32507	-1.92799
					FBgn0035982	CG4461	3.58112																		FBgn0052523	CG32523	-2.24446
					FBgn0266047	CG44812	-6.66129																		FBgn0052547	CG32547	-1.26343
					FBgn0266100	CG44837	-1.74931																		FBgn0052581	CG32581	2.59706
					FBgn0031895	CG4497	-1.76765																		FBgn0038221	CG3259	-4.80541
					FBgn0266363	CG45011	-2.74738																		FBgn0052639	CG32639	-6.38947
					FBgn0266446	CG45076	2.7375																		FBgn0052655	CG32655	-3.03531
					FBgn0266448	CG45078	2.54843																		FBgn0052668	CG32668	-5.19672
					FBgn0266566	CG45105	-3.49879																		FBgn0052686	CG32686	-2.41374
					FBgn0266696	CG45186	1.07965																		FBgn0052694	CG32694	2.03829
					FBgn0266801	CG45263	-1.15354																		FBgn0052791	CG32791	-1.10167
					FBgn0038745	CG4538	1.66409																		FBgn0052797	CG32797	-4.02245
					FBgn0267163	CG45603	-4.89909																		FBgn0267796	CG3280	2.17596
					FBgn0267428	CG45781	-2.57972																		FBgn0260741	CG3281	-4.27914
					FBgn0267430	CG45783	-1.93815																		FBgn0052814	CG32814	-2.59591
					FBgn0267431	CG45784	-1.51051																		FBgn0052829	CG32829	-2.61419
					FBgn0028863	CG4587	-1.22252																		FBgn0052845	CG32845	-3.66301
					FBgn0029935	CG4615	1.58816																		FBgn0052846	CG32846	-3.04213
					FBgn0031299	CG4629	-3.28446																		FBgn0052850	CG32850	-1.31382
					FBgn0030429	CG4661	-1.81137																		FBgn0031628	CG3294	-3.03585
					FBgn0038735	CG4662	-2.02989																		FBgn0034573	CG3295	2.15414
					FBgn0035598	CG4669	-2.53756																		FBgn0038877	CG3308	2.831
					FBgn0033814	CG4670	2.83559																		FBgn0053093	CG33093	-7.90106
					FBgn0033816	CG4679	-1.88963																		FBgn0053110	CG33110	2.5645
					FBgn0033820	CG4716	2.20388																		FBgn0053127	CG33127	-6.51934
					FBgn0035040	CG4741	-5.44339																		FBgn0053155	CG33155	-2.96548
					FBgn0035600	CG4769	1.28833																		FBgn0053177	CG33177	-6.4384
					FBgn0038756	CG4783	-2.50069																		FBgn0053203	CG33203	-1.17819
					FBgn0028514	CG4793	-2.9528																		FBgn0038224	CG3321	2.43159
					FBgn0030796	CG4829	2.22265																		FBgn0053233	CG33233	-2.43904
					FBgn0034229	CG4847	3.64743																		FBgn0053234	CG33234	-1.71796
					FBgn0030799	CG4872	4.20849																		FBgn0053258	CG33258	-6.27514
					FBgn0036614	CG4925	1.77476																		FBgn0035802	CG33275	1.45622
					FBgn0027556	CG4928	2.11987																		FBgn0053278	CG33278	-5.62548
					FBgn0028897	CG4935	-3.69989																		FBgn0034985	CG3328	2.33176
					FBgn0030813	CG4949	-5.67202																		FBgn0053284	CG33284	-3.06824
					FBgn0039563	CG4951	-6.48833																		FBgn0053285	CG33285	-5.20317
					FBgn0036597	CG4962	2.78695																		FBgn0053288	CG33288	-2.75726
					FBgn0030817	CG4991	3.03673																		FBgn0039511	CG3330	-5.62182
					FBgn0031322	CG5001	2.23627																		FBgn0053306	CG33306	-2.40038
					FBgn0035944	CG5021	-6.44382																		FBgn0053310	CG33310	-3.23764
					FBgn0038774	CG5023	3.53184																		FBgn0053322	CG33322	-2.41449
					FBgn0035951	CG5068	-3.62366																		FBgn0031240	CG3345	-1.73518
					FBgn0037005	CG5078	-5.9743																		FBgn0053463	CG33463	-6.48959
					FBgn0031313	CG5080	2.79578																		FBgn0053475	CG33475	-5.76192
					FBgn0031320	CG5126	-3.22823																		FBgn0053476	CG33476	-3.28735
					FBgn0030828	CG5162	3.62432																		FBgn0053477	CG33477	-2.66717
					FBgn0030830	CG5172	4.29599																		FBgn0053552	CG33552	-5.5519
					FBgn0031908	CG5177	2.53834																		FBgn0053639	CG33639	-1.04816
					FBgn0038803	CG5191	1.9557																		FBgn0053640	CG33640	-1.87398
					FBgn0032473	CG5204	-5.23174																		FBgn0053641	CG33641	-2.33662
					FBgn0037891	CG5214	1.69287																		FBgn0053643	CG33643	-2.7032
					FBgn0283658	CG5261	1.55973																		FBgn0053644	CG33644	-4.83866
					FBgn0036988	CG5262	-4.50418																		FBgn0053645	CG33645	-4.63601
					FBgn0034154	CG5267	-3.87476																		FBgn0053710	CG33710	-7.05533
					FBgn0037897	CG5270	1.48374																		FBgn0053723	CG33723	-4.18003
					FBgn0040382	CG5273	2.37696																		FBgn0053752	CG33752	-5.25946
					FBgn0038986	CG5278	3.53757																		FBgn0053758	CG33758	-3.26063
					FBgn0035952	CG5280	-5.61255																		FBgn0053775	CG33775	-5.86974
					FBgn0037902	CG5281	2.33192																		FBgn0053927	CG33927	-2.15689
					FBgn0038983	CG5326	2.92982																		FBgn0047095	CG33939	4.07168
					FBgn0034156	CG5348	-2.02828																		FBgn0034999	CG3394	2.47718
					FBgn0032242	CG5355	1.77182																		FBgn0053958	CG33958	-4.11018
					FBgn0037773	CG5359	-5.93282																		FBgn0053970	CG33970	1.83842
					FBgn0032218	CG5381	2.6158																		FBgn0053978	CG33978	1.47207
					FBgn0032216	CG5384	2.49891																		FBgn0053998	CG33998	-3.62798
					FBgn0032213	CG5390	3.83047																		FBgn0054026	CG34026	-4.32497
					FBgn0039153	CG5463	-5.73423																		FBgn0054027	CG34027	-5.15234
					FBgn0038815	CG5466	-1.93296																		FBgn0054030	CG34030	-3.963
					FBgn0027565	CG5498	1.90931																		FBgn0054045	CG34045	-3.76082
					FBgn0286507	CG5538	-5.25888																		FBgn0054057	CG34057	-4.46006
					FBgn0034919	CG5569	-5.89291																		FBgn0036008	CG3408	-2.14681
					FBgn0034920	CG5597	4.7481																		FBgn0083945	CG34109	-2.33509
					FBgn0035942	CG5660	3.26197																		FBgn0083949	CG34113	-1.5584
					FBgn0032656	CG5674	-1.64026																		FBgn0083950	CG34114	-1.55752
					FBgn0034290	CG5773	2.89678																		FBgn0083956	CG34120	2.67438
					FBgn0038930	CG5778	2.06762																		FBgn0083963	CG34127	-1.37293
					FBgn0032448	CG5781	-4.744																		FBgn0083973	CG34137	-2.34769
					FBgn0030855	CG5800	-4.84294																		FBgn0083985	CG34149	-5.94828
					FBgn0038897	CG5849	3.03335																		FBgn0250826	CG34160	-3.20639
					FBgn0027586	CG5867	4.06851																		FBgn0085190	CG34161	-3.04433
					FBgn0038511	CG5873	2.81987																		FBgn0085194	CG34165	4.52814
					FBgn0036220	CG5897	-4.30512																		FBgn0085195	CG34166	2.42475
					FBgn0039136	CG5902	2.06163																		FBgn0085198	CG34169	-6.44865
					FBgn0036217	CG5906	-6.98825																		FBgn0085207	CG34178	-4.7123
					FBgn0029835	CG5921	-3.38618																		FBgn0085210	CG34181	-4.67773
					FBgn0032494	CG5945	3.22956																		FBgn0085217	CG34188	-1.5027
					FBgn0030912	CG6023	2.59196																		FBgn0085218	CG34189	-3.30636
					FBgn0036750	CG6034	-2.66035																		FBgn0085220	CG34191	-6.16387
					FBgn0038679	CG6040	2.26779																		FBgn0085230	CG34201	-5.86527
					FBgn0036747	CG6052	-4.39799																		FBgn0085235	CG34206	-5.75897
					FBgn0036186	CG6071	-6.44713																		FBgn0085242	CG34213	-5.64883
					FBgn0086254	CG6084	2.90632																		FBgn0085243	CG34214	-5.57615
					FBgn0033853	CG6145	1.66734																		FBgn0085246	CG34217	4.58404
					FBgn0039420	CG6154	-1.66244																		FBgn0085248	CG34219	-4.63692
					FBgn0038321	CG6218	2.1406																		FBgn0250822	CG34222	-5.98403
					FBgn0027582	CG6230	2.68844																		FBgn0085256	CG34227	4.44824
					FBgn0036126	CG6272	-4.86184																		FBgn0085261	CG34232	-4.15915
					FBgn0032350	CG6287	2.60109																		FBgn0085274	CG34245	-3.30076
					FBgn0039470	CG6296	-4.55124																		FBgn0085289	CG34260	-4.5045
					FBgn0038893	CG6353	-4.38363																		FBgn0284444	CG34264	-5.38051
					FBgn0029693	CG6379	2.06087																		FBgn0085312	CG34283	-6.74755
					FBgn0030870	CG6398	3.0987																		FBgn0085321	CG34292	-5.04726
					FBgn0034270	CG6401	-2.51711																		FBgn0085356	CG34327	6.19216
					FBgn0036106	CG6409	3.01894																		FBgn0085357	CG34328	-2.88995
					FBgn0034162	CG6426	3.15423																		FBgn0085359	CG34330	4.34699
					FBgn0038922	CG6439	1.54466																		FBgn0263829	CG34334	-6.072
					FBgn0031920	CG6441	-1.325																		FBgn0085382	CG34353	-1.41743
					FBgn0019960	CG6455	3.14259																		FBgn0085385	CG34356	-1.36685
					FBgn0040606	CG6503	3.05294																		FBgn0085386	CG34357	-1.55858
					FBgn0034214	CG6550	-3.96812																		FBgn0085400	CG34371	-1.24632
					FBgn0035673	CG6602	-5.10165																		FBgn0085420	CG34391	-1.275
					FBgn0036072	CG6628	-3.30807																		FBgn0085422	CG34393	-1.17459
					FBgn0037860	CG6629	7.40967																		FBgn0085425	CG34396	2.69795
					FBgn0035911	CG6638	-3.01146																		FBgn0085427	CG34398	1.9707
					FBgn0039030	CG6660	-3.57995																		FBgn0085431	CG34402	-5.68836
					FBgn0035902	CG6683	-3.28658																		FBgn0085446	CG34417	2.48773
					FBgn0031926	CG6739	3.25885																		FBgn0085459	CG34430	-1.73785
					FBgn0030876	CG6762	-3.16227																		FBgn0085479	CG34450	-2.21535
					FBgn0032400	CG6770	1.55566																		FBgn0250833	CG34461	3.54916
					FBgn0037921	CG6808	-5.33568																		FBgn0031881	CG3476	-5.85591
					FBgn0037935	CG6834	2.21346																		FBgn0028887	CG3491	-2.37834
					FBgn0036834	CG6836	3.36599																		FBgn0035007	CG3492	-3.64971
					FBgn0036820	CG6852	2.86804																		FBgn0038250	CG3505	4.09549
					FBgn0036262	CG6910	3.16858																		FBgn0283427	CG3523	2.31727
					FBgn0029733	CG6927	-6.20249																		FBgn0040355	CG3526	-4.05131
					FBgn0036476	CG6945	-2.58054																		FBgn0025643	CG3588	2.02231
					FBgn0039008	CG6972	5.43306																		FBgn0031417	CG3597	1.96665
					FBgn0039027	CG7031	4.51792																		FBgn0031238	CG3645	-2.75343
					FBgn0038957	CG7059	-3.84371																		FBgn0040348	CG3703	-2.87308
					FBgn0037151	CG7130	-6.3265																		FBgn0040346	CG3704	-5.02456
					FBgn0038586	CG7168	-5.87755																		FBgn0038271	CG3731	2.13708
					FBgn0038583	CG7183	3.21338																		FBgn0038700	CG3734	-4.66734
					FBgn0031945	CG7191	3.40157																		FBgn0024989	CG3777	2.83283
					FBgn0031942	CG7203	3.18334																		FBgn0034802	CG3800	1.53097
					FBgn0031940	CG7214	3.81158																		FBgn0036838	CG3808	-4.6568
					FBgn0033544	CG7220	1.07796																		FBgn0035091	CG3829	1.98856
					FBgn0031730	CG7236	-6.81489																		FBgn0023507	CG3835	2.96461
					FBgn0036501	CG7272	2.16429																		FBgn0036824	CG3902	2.20014
					FBgn0031713	CG7277	-4.74154																		FBgn0031571	CG3921	2.13418
					FBgn0032283	CG7296	3.48892																		FBgn0037780	CG3925	2.44724
					FBgn0032282	CG7299	4.76003																		FBgn0036821	CG3961	1.74317
					FBgn0037074	CG7324	1.7369																		FBgn0038472	CG3995	-3.29329
					FBgn0036765	CG7408	-5.6301																		FBgn0038820	CG4000	3.9536
					FBgn0036762	CG7430	2.64284																		FBgn0287183	CG40178	-2.30814
					FBgn0034432	CG7461	1.99287																		FBgn0034885	CG4019	1.81046
					FBgn0038106	CG7488	-5.84166																		FBgn0058191	CG40191	-1.84525
					FBgn0036734	CG7564	-1.30724																		FBgn0058198	CG40198	2.74523
					FBgn0036728	CG7580	3.01773																		FBgn0037018	CG4042	-2.47334
					FBgn0039681	CG7582	2.11206																		FBgn0069969	CG40498	-1.07144
					FBgn0036926	CG7646	-1.85731																		FBgn0020312	CG4050	-1.49055
					FBgn0036929	CG7668	2.13284																		FBgn0038017	CG4115	4.06838
					FBgn0032025	CG7778	3.46031																		FBgn0085638	CG41378	-2.92024
					FBgn0032018	CG7806	2.88674																		FBgn0025627	CG4194	-3.85552
					FBgn0033060	CG7849	-5.80109																		FBgn0031251	CG4213	3.16876
					FBgn0039736	CG7912	-3.06858																		FBgn0038385	CG4221	2.03025
					FBgn0039737	CG7920	2.83989																		FBgn0250867	CG42238	-1.24323
					FBgn0039741	CG7943	-1.97765																		FBgn0259149	CG42264	-2.61957
					FBgn0028533	CG7953	-3.49624																		FBgn0259151	CG42266	-3.84447
					FBgn0038115	CG7966	4.4244																		FBgn0259164	CG42269	1.76919
					FBgn0028499	CG7985	2.13082																		FBgn0259183	CG42287	-1.14538
					FBgn0035268	CG8001	2.35299																		FBgn0259184	CG42288	-2.55002
					FBgn0035854	CG8005	-5.92351																		FBgn0259213	CG42313	-1.71375
					FBgn0040832	CG8012	4.47519																		FBgn0259219	CG42319	2.63797
					FBgn0037607	CG8036	1.81878																		FBgn0259223	CG42323	3.14639
					FBgn0032010	CG8086	2.47971																		FBgn0259233	CG42331	3.37548
					FBgn0034010	CG8157	-4.08207																		FBgn0259239	CG42337	-1.44219
					FBgn0030864	CG8173	-6.5005																		FBgn0259241	CG42339	-1.83006
					FBgn0034030	CG8192	3.34509																		FBgn0259245	CG42343	-1.63635
					FBgn0035830	CG8209	2.86815																		FBgn0259707	CG42361	-2.97833
					FBgn0037624	CG8223	-7.46019																		FBgn0030745	CG4239	3.88916
					FBgn0033350	CG8237	-5.53995																		FBgn0259736	CG42390	2.86393
					FBgn0030683	CG8239	-4.44174																		FBgn0259737	CG42391	-6.11385
					FBgn0033031	CG8245	-1.95374																		FBgn0259739	CG42393	-2.27834
					FBgn0033347	CG8248	-3.71322																		FBgn0259821	CG42402	-1.49763
					FBgn0029937	CG8300	-3.96348																		FBgn0259992	CG42489	-4.17194
					FBgn0034142	CG8306	3.95337																		FBgn0260428	CG42523	-3.00714
					FBgn0034141	CG8311	2.62586																		FBgn0260429	CG42524	-1.49913
					FBgn0037720	CG8312	1.8327																		FBgn0260431	CG42526	-2.87276
					FBgn0034140	CG8317	2.01574																		FBgn0260971	CG42594	-1.62995
					FBgn0036020	CG8336	-6.65088																		FBgn0261570	CG42684	-1.28231
					FBgn0034054	CG8366	-3.21338																		FBgn0261698	CG42732	-1.16707
					FBgn0034063	CG8389	-2.16159																		FBgn0261686	CG42733	-3.84522
					FBgn0034066	CG8397	3.49655																		FBgn0261801	CG42747	-2.83922
					FBgn0034067	CG8399	3.5454																		FBgn0261804	CG42750	-1.29365
					FBgn0034084	CG8435	-5.69952																		FBgn0014092	CG4278	-3.97708
					FBgn0038235	CG8461	-4.21804																		FBgn0263354	CG42784	-1.50944
					FBgn0038127	CG8476	-5.65463																		FBgn0261990	CG42808	4.73677
					FBgn0038126	CG8483	4.0216																		FBgn0261991	CG42809	-3.32179
					FBgn0037754	CG8500	-1.10827																		FBgn0261992	CG42810	-3.49577
					FBgn0030696	CG8509	-2.61865																		FBgn0262017	CG42830	-4.89055
					FBgn0033734	CG8520	1.93401																		FBgn0262170	CG42878	-1.73168
					FBgn0033741	CG8545	1.89267																		FBgn0262357	CG43055	-3.71453
					FBgn0033919	CG8547	2.687																		FBgn0262358	CG43056	-1.74
					FBgn0038130	CG8630	2.65898																		FBgn0262478	CG43068	-4.5398
					FBgn0031684	CG8680	1.5087																		FBgn0262482	CG43072	-3.74359
					FBgn0033258	CG8712	-6.28325																		FBgn0262484	CG43074	-4.91359
					FBgn0033308	CG8736	3.61733																		FBgn0262508	CG43078	1.91525
					FBgn0033760	CG8785	1.96019																		FBgn0262534	CG43088	-4.54234
					FBgn0031531	CG8840	-3.61225																		FBgn0262535	CG43089	-4.17207
					FBgn0037676	CG8861	-1.52311																		FBgn0262537	CG43091	-2.6674
					FBgn0038405	CG8927	3.74681																		FBgn0262539	CG43093	-2.00128
					FBgn0030725	CG8958	-1.73718																		FBgn0262541	CG43095	-3.82523
					FBgn0030614	CG9072	-2.28468																		FBgn0262568	CG43108	-3.60822
					FBgn0034497	CG9090	4.43078																		FBgn0262571	CG43111	-2.1529
					FBgn0030617	CG9095	3.35237																		FBgn0262788	CG43169	-3.98928
					FBgn0035207	CG9153	1.18637																		FBgn0262794	CG43175	-4.08127
					FBgn0032524	CG9267	-5.8241																		FBgn0262817	CG43188	-5.58122
					FBgn0038181	CG9297	4.78891																		FBgn0262820	CG43191	-5.22831
					FBgn0032514	CG9302	-5.78934																		FBgn0262854	CG43218	-3.83747
					FBgn0032511	CG9306	2.43328																		FBgn0262855	CG43219	-2.00675
					FBgn0038179	CG9312	3.5642																		FBgn0262876	CG43231	-2.35434
					FBgn0032889	CG9331	2.06321																		FBgn0263004	CG43312	-3.5463
					FBgn0032897	CG9336	3.89017																		FBgn0263027	CG43322	-4.56442
					FBgn0037063	CG9391	2.43113																		FBgn0263029	CG43324	-1.44972
					FBgn0032506	CG9395	-1.31006																		FBgn0263034	CG43329	-1.88652
					FBgn0033092	CG9422	-3.49852																		FBgn0263035	CG43330	-3.23431
					FBgn0033110	CG9447	-5.65265																		FBgn0263036	CG43331	-2.03177
					FBgn0032068	CG9466	19.7852																		FBgn0263077	CG43340	1.84306
					FBgn0034618	CG9485	2.45815																		FBgn0263072	CG43347	-1.01239
					FBgn0030598	CG9503	-2.97499																		FBgn0263083	CG43351	-2.05257
					FBgn0030593	CG9512	2.33783																		FBgn0263114	CG43371	-6.91599
					FBgn0030592	CG9514	-2.10452																		FBgn0263270	CG43396	-3.2979
					FBgn0030589	CG9519	2.29556																		FBgn0263400	CG43446	-1.88443
					FBgn0031813	CG9527	2.50238																		FBgn0263763	CG43680	-5.04674
					FBgn0031817	CG9531	-5.29626																		FBgn0263772	CG43689	-1.25424
					FBgn0040529	CG9603	2.89859																		FBgn0263842	CG43703	-3.35777
					FBgn0037565	CG9626	2.84056																		FBgn0263999	CG43742	-2.17494
					FBgn0036433	CG9628	2.0774																		FBgn0031295	CG4375	-3.76059
					FBgn0038377	CG9632	-4.32596																		FBgn0264329	CG43788	-2.68667
					FBgn0038211	CG9649	2.67333																		FBgn0264339	CG43795	-1.4102
					FBgn0031516	CG9663	1.9659																		FBgn0264395	CG43843	-4.54132
					FBgn0030775	CG9673	-3.78235																		FBgn0264449	CG43867	-1.03393
					FBgn0030158	CG9686	3.53267																		FBgn0264489	CG43897	3.21548
					FBgn0036659	CG9701	4.13805																		FBgn0264563	CG43935	-5.01574
					FBgn0030768	CG9723	-4.61566																		FBgn0264566	CG43938	-2.20888
					FBgn0039754	CG9747	3.08665																		FBgn0264699	CG43968	-4.06882
					FBgn0037229	CG9766	-1.8299																		FBgn0264711	CG43980	2.60055
					FBgn0030763	CG9782	3.50455																		FBgn0264739	CG43997	-3.45598
					FBgn0037232	CG9791	-2.26123																		FBgn0264744	CG44002	-4.70204
					FBgn0034860	CG9812	2.02121																		FBgn0264750	CG44008	-2.17385
					FBgn0034623	CG9822	3.09429																		FBgn0264751	CG44009	-3.96089
					FBgn0037635	CG9837	-1.65381																		FBgn0023545	CG4406	-2.6796
					FBgn0034903	CG9850	2.28491																		FBgn0264894	CG44085	1.82601
					FBgn0038200	CG9920	3.37059																		FBgn0031296	CG4415	-2.61572
					FBgn0039594	CG9990	1.68234																		FBgn0265002	CG44153	-1.97204
					FBgn0045761	CHKov1	4.59742																		FBgn0265084	CG44195	2.78739
					FBgn0039328	CHKov2	3.61572																		FBgn0265180	CG44245	1.54085
					FBgn0035282	CNMa	4.64996																		FBgn0265184	CG44249	-2.56421
					FBgn0029502	COQ7	2.4883																		FBgn0265189	CG44254	-3.54267
					FBgn0050055	CR30055	-1.51413																		FBgn0265342	CG44296	-5.04719
					FBgn0050267	CR30267	-2.72776																		FBgn0032115	CG4438	-2.63358
					FBgn0051781	CR31781	3.05544																		FBgn0265535	CG44385	-4.27845
					FBgn0052160	CR32160	4.64955																		FBgn0265579	CG44406	-6.02591
					FBgn0058469	CR40469	2.95111																		FBgn0265595	CG44422	-1.14663
					FBgn0085777	CR40959	2.60431																		FBgn0265629	CG44437	-4.57694
					FBgn0085799	CR41544	5.52291																		FBgn0265631	CG44438	-5.08581
					FBgn0085807	CR41590	1.65007																		FBgn0265714	CG44521	-3.67556
					FBgn0261636	CR42719	-5.73925																		FBgn0028506	CG4455	1.90289
					FBgn0261638	CR42721	-6.80649																		FBgn0038753	CG4459	-7.0712
					FBgn0261709	CR42746	-2.52774																		FBgn0035982	CG4461	3.10595
					FBgn0261833	CR42765	-5.38396																		FBgn0266047	CG44812	-5.83205
					FBgn0262543	CR43097	-2.30386																		FBgn0266100	CG44837	-2.16384
					FBgn0262681	CR43151	-4.68316																		FBgn0031894	CG4496	3.44249
					FBgn0262690	CR43160	4.0414																		FBgn0266441	CG45071	-1.54805
					FBgn0262903	CR43258	24.1809																		FBgn0266446	CG45076	2.49661
					FBgn0262974	CR43285	-2.94488																		FBgn0266448	CG45078	1.94204
					FBgn0263332	CR43413	-7.22946																		FBgn0266566	CG45105	-2.9964
					FBgn0263336	CR43417	-5.79215																		FBgn0266745	CG45218	-2.081
					FBgn0263339	CR43420	-2.89894																		FBgn0266801	CG45263	-1.4038
					FBgn0263414	CR43460	-1.75394																		FBgn0038745	CG4538	1.13873
					FBgn0263445	CR43468	-4.5548																		FBgn0267163	CG45603	-6.35171
					FBgn0263449	CR43472	-5.46085																		FBgn0267431	CG45784	-2.62514
					FBgn0263499	CR43488	-2.46976																		FBgn0039344	CG4582	-2.35736
					FBgn0263506	CR43495	-2.41969																		FBgn0037849	CG4596	-1.33944
					FBgn0263507	CR43496	-3.38031																		FBgn0035591	CG4611	-4.61393
					FBgn0263582	CR43607	-1.59256																		FBgn0031299	CG4629	-2.43849
					FBgn0263587	CR43612	-6.39899																		FBgn0032590	CG4631	-1.56494
					FBgn0263611	CR43620	-2.52325																		FBgn0030435	CG4645	-2.10869
					FBgn0263615	CR43624	-5.84461																		FBgn0030776	CG4653	-4.06802
					FBgn0263708	CR43660	-8.10236																		FBgn0032170	CG4658	2.22053
					FBgn0263709	CR43661	-3.13089																		FBgn0030429	CG4661	-3.82697
					FBgn0263778	CR43695	-3.54105																		FBgn0035598	CG4669	-1.64872
					FBgn0263843	CR43704	-7.03366																		FBgn0033814	CG4670	1.98471
					FBgn0264348	CR43804	-3.37272																		FBgn0035032	CG4692	2.5479
					FBgn0264374	CR43826	-2.46544																		FBgn0033820	CG4716	2.21137
					FBgn0264376	CR43828	-1.90524																		FBgn0039022	CG4725	-2.19386
					FBgn0264379	CR43831	-5.13455																		FBgn0035040	CG4741	-3.35478
					FBgn0264427	CR43845	-2.26334																		FBgn0034733	CG4752	3.05089
					FBgn0264479	CR43887	-5.40085																		FBgn0035600	CG4769	1.58738
					FBgn0264500	CR43899	-5.57877																		FBgn0038756	CG4783	-2.92678
					FBgn0264505	CR43904	-5.67189																		FBgn0032354	CG4788	-3.13106
					FBgn0264697	CR43966	-4.00779																		FBgn0028514	CG4793	-1.65881
					FBgn0264701	CR43970	-4.87444																		FBgn0260456	CG4806	1.85146
					FBgn0264723	CR43991	-3.49383																		FBgn0030796	CG4829	1.90731
					FBgn0264834	CR44042	-4.6053																		FBgn0032187	CG4839	-1.6624
					FBgn0264839	CR44047	4.45758																		FBgn0034229	CG4847	4.00033
					FBgn0264842	CR44050	-2.24452																		FBgn0030803	CG4880	-5.17579
					FBgn0264843	CR44051	-6.7231																		FBgn0027556	CG4928	2.18847
					FBgn0264878	CR44069	2.39804																		FBgn0283681	CG4933	3.91124
					FBgn0264882	CR44073	-2.6925																		FBgn0030813	CG4949	-5.80457
					FBgn0264945	CR44114	-2.96865																		FBgn0032204	CG4953	-4.3841
					FBgn0265050	CR44165	-3.31304																		FBgn0036597	CG4962	3.32977
					FBgn0265060	CR44171	-3.5812																		FBgn0030817	CG4991	2.49977
					FBgn0265076	CR44187	-2.28316																		FBgn0031322	CG5001	2.51305
					FBgn0265077	CR44188	-2.71656																		FBgn0038774	CG5023	3.80183
					FBgn0265098	CR44203	3.85264																		FBgn0039358	CG5028	1.29737
					FBgn0265149	CR44218	-1.3278																		FBgn0038324	CG5038	-2.20129
					FBgn0265151	CR44220	-5.26856																		FBgn0029747	CG5062	-2.73194
					FBgn0265163	CR44232	-5.65405																		FBgn0037005	CG5078	-4.68667
					FBgn0265164	CR44233	-7.70516																		FBgn0031313	CG5080	1.85031
					FBgn0265167	CR44236	-2.90523																		FBgn0030828	CG5162	3.78332
					FBgn0265347	CR44301	-2.20366																		FBgn0030830	CG5172	3.48652
					FBgn0265376	CR44317	-2.27247																		FBgn0031908	CG5177	3.08405
					FBgn0265379	CR44320	-3.85058																		FBgn0037891	CG5214	1.73044
					FBgn0265467	CR44360	-2.78372																		FBgn0283658	CG5261	2.07622
					FBgn0265500	CR44369	-5.77964																		FBgn0034154	CG5267	-2.17209
					FBgn0265511	CR44373	-2.53853																		FBgn0040382	CG5273	1.90695
					FBgn0265534	CR44384	-4.52946																		FBgn0035952	CG5280	-4.78331
					FBgn0265544	CR44394	-5.79565																		FBgn0036772	CG5290	-3.08704
					FBgn0265685	CR44492	-2.3383																		FBgn0038491	CG5292	-3.30881
					FBgn0265689	CR44496	-7.1506																		FBgn0038983	CG5326	1.96151
					FBgn0265699	CR44506	-2.2298																		FBgn0034156	CG5348	-1.97582
					FBgn0265704	CR44511	4.67556																		FBgn0032242	CG5355	1.98053
					FBgn0265808	CR44597	-6.67302																		FBgn0038951	CG5380	-5.42135
					FBgn0265823	CR44612	-2.37223																		FBgn0032218	CG5381	3.05691
					FBgn0265997	CR44772	-6.41391																		FBgn0032213	CG5390	3.55374
					FBgn0266052	CR44817	-3.25536																		FBgn0031327	CG5397	4.11383
					FBgn0266072	CR44825	-6.86177																		FBgn0034368	CG5482	1.22563
					FBgn0266094	CR44831	-3.14482																		FBgn0038054	CG5509	-3.30176
					FBgn0266097	CR44834	-3.30188																		FBgn0035639	CG5537	2.44857
					FBgn0266142	CR44848	-7.54086																		FBgn0286507	CG5538	-5.39144
					FBgn0266214	CR44909	-2.73309																		FBgn0030603	CG5541	-1.69447
					FBgn0266216	CR44911	-4.42794																		FBgn0032208	CG5604	1.17464
					FBgn0266232	CR44927	5.59038																		FBgn0038058	CG5608	-2.51589
					FBgn0266322	CR44987	-2.09409																		FBgn0039531	CG5611	-3.68805
					FBgn0266328	CR44993	-7.78105																		FBgn0039529	CG5612	-3.14292
					FBgn0266348	CR44997	-1.8509																		FBgn0035948	CG5644	-5.59098
					FBgn0266390	CR45030	-2.38831																		FBgn0026570	CG5704	-5.5108
					FBgn0266403	CR45043	-2.6396																		FBgn0032486	CG5705	-4.7475
					FBgn0266619	CR45126	-1.31343																		FBgn0036222	CG5718	-5.60376
					FBgn0266621	CR45128	-6.10555																		FBgn0034315	CG5721	-1.56788
					FBgn0266630	CR45137	-2.27845																		FBgn0039182	CG5728	1.78356
					FBgn0266642	CR45149	-5.68397																		FBgn0034290	CG5773	3.20841
					FBgn0266646	CR45153	-6.33185																		FBgn0038930	CG5778	2.67577
					FBgn0266680	CR45170	-1.75337																		FBgn0032448	CG5781	-6.3729
					FBgn0266688	CR45178	-2.49858																		FBgn0027539	CG5807	-2.34782
					FBgn0266690	CR45180	-4.63172																		FBgn0034717	CG5819	2.87917
					FBgn0266726	CR45199	-5.74025																		FBgn0038682	CG5835	3.37658
					FBgn0266727	CR45200	-5.48499																		FBgn0038049	CG5844	3.40397
					FBgn0266737	CR45210	-5.95324																		FBgn0027586	CG5867	4.60751
					FBgn0266750	CR45223	-2.60532																		FBgn0038511	CG5873	3.1948
					FBgn0266772	CR45237	-2.48878																		FBgn0036220	CG5897	-6.71436
					FBgn0266836	CR45298	-5.42683																		FBgn0039136	CG5902	1.84851
					FBgn0266851	CR45312	-2.58302																		FBgn0036217	CG5906	-4.28258
					FBgn0266871	CR45332	-2.72372																		FBgn0029833	CG5941	-4.26286
					FBgn0266872	CR45333	-2.18402																		FBgn0032494	CG5945	3.16972
					FBgn0266886	CR45347	-2.01768																		FBgn0038675	CG6013	-5.07277
					FBgn0266974	CR45425	-3.23201																		FBgn0037001	CG6020	2.33914
					FBgn0267012	CR45456	3.74582																		FBgn0036750	CG6034	-2.1285
					FBgn0267013	CR45457	4.18905																		FBgn0038679	CG6040	2.68576
					FBgn0267035	CR45479	-4.13812																		FBgn0036747	CG6052	-2.89913
					FBgn0267076	CR45520	-5.17908																		FBgn0029828	CG6067	2.62467
					FBgn0267102	CR45542	-5.59661																		FBgn0086254	CG6084	1.80625
					FBgn0267117	CR45557	-1.65215																		FBgn0038407	CG6126	1.92
					FBgn0267243	CR45683	-1.17362																		FBgn0032268	CG6138	-5.14144
					FBgn0267263	CR45699	-5.55247																		FBgn0036152	CG6175	1.98315
					FBgn0267270	CR45706	-4.92852																		FBgn0033862	CG6209	-2.35908
					FBgn0267399	CR45761	-3.17764																		FBgn0033865	CG6220	-4.62011
					FBgn0267400	CR45762	-2.99297																		FBgn0030631	CG6227	-2.34741
					FBgn0267443	CR45793	-2.06268																		FBgn0038720	CG6231	2.22973
					FBgn0267461	CR45811	-2.71498																		FBgn0038708	CG6255	-4.97169
					FBgn0267469	CR45819	-2.23634																		FBgn0032350	CG6287	1.85088
					FBgn0267526	CR45866	-5.55021																		FBgn0036731	CG6333	-4.12848
					FBgn0267537	CR45877	-5.48595																		FBgn0033873	CG6337	-4.75221
					FBgn0267538	CR45878	-3.97454																		FBgn0037816	CG6345	-4.7863
					FBgn0267549	CR45889	-3.46581																		FBgn0033874	CG6347	-4.27705
					FBgn0267556	CR45896	-5.31756																		FBgn0038893	CG6353	-6.78136
					FBgn0267561	CR45901	-5.93512																		FBgn0039178	CG6356	1.96381
					FBgn0267563	CR45903	-5.17645																		FBgn0033875	CG6357	1.52613
					FBgn0267572	CR45912	-5.79215																		FBgn0030870	CG6398	3.72474
					FBgn0267578	CR45918	-5.38969																		FBgn0036106	CG6409	3.47974
					FBgn0267611	CR45949	-6.13881																		FBgn0034162	CG6426	2.69006
					FBgn0267624	CR45962	-1.32026																		FBgn0029689	CG6428	-5.73186
					FBgn0267626	CR45964	-2.29803																		FBgn0046999	CG6429	3.25116
					FBgn0267628	CR45966	-4.04854																		FBgn0038922	CG6439	1.82773
					FBgn0267629	CR45967	-3.3822																		FBgn0031920	CG6441	-2.56416
					FBgn0267638	CR45976	-4.87153																		FBgn0019960	CG6455	1.7134
					FBgn0267643	CR45981	-7.13375																		FBgn0034166	CG6472	-1.71531
					FBgn0267645	CR45983	-6.15771																		FBgn0036710	CG6479	-2.93356
					FBgn0267655	CR45993	-3.21151																		FBgn0040606	CG6503	2.62319
					FBgn0267659	CR45997	-4.09648																		FBgn0032303	CG6508	-2.88239
					FBgn0267664	CR46002	-5.45854																		FBgn0036085	CG6527	-2.06191
					FBgn0267680	CR46016	-4.34406																		FBgn0034214	CG6550	-3.61465
					FBgn0267687	CR46023	-3.7406																		FBgn0038909	CG6569	-4.75386
					FBgn0267693	CR46029	-3.62702																		FBgn0036967	CG6597	1.26013
					FBgn0267694	CR46030	-5.5091																		FBgn0035673	CG6602	-6.71693
					FBgn0267706	CR46039	-6.4684																		FBgn0030946	CG6659	1.92454
					FBgn0267710	CR46043	-7.14124																		FBgn0039030	CG6660	-3.11327
					FBgn0267733	CR46064	-3.44981																		FBgn0036063	CG6674	-2.65627
					FBgn0267735	CR46066	-3.39515																		FBgn0035902	CG6683	-3.73503
					FBgn0267753	CR46084	-2.38585																		FBgn0033889	CG6701	1.74242
					FBgn0267769	CR46100	-6.40876																		FBgn0039049	CG6726	-2.96168
					FBgn0267771	CR46102	-4.66528																		FBgn0039052	CG6733	-2.53087
					FBgn0025456	CREG	2.06983																		FBgn0039053	CG6738	-2.73057
					FBgn0028836	CSN7	-2.25337																		FBgn0031926	CG6739	3.11566
					FBgn0263006	Ca-P60A	2.47385																		FBgn0034704	CG6758	-4.73245
					FBgn0264607	CaMKII	-1.43385																		FBgn0030876	CG6762	-2.80895
					FBgn0036715	Cad74A	3.43275																		FBgn0035903	CG6765	-1.16797
					FBgn0262018	CadN2	-2.02934																		FBgn0032400	CG6770	2.19998
					FBgn0042134	Capr	2.16886																		FBgn0034177	CG6796	-4.73127
					FBgn0023095	Caps	-1.21462																		FBgn0034179	CG6805	1.28353
					FBgn0000261	Cat	3.95008																		FBgn0037935	CG6834	1.89978
					FBgn0035918	Cdc6	3.2978																		FBgn0030887	CG6867	-1.84694
					FBgn0000299	Cg25C	3.05784																		FBgn0037936	CG6908	3.1215
					FBgn0035499	Chd64	1.61572																		FBgn0036262	CG6910	3.19779
					FBgn0067311	CheB38b	-5.60415																		FBgn0038290	CG6912	1.73789
					FBgn0053348	CheB42a	-1.8517																		FBgn0037172	CG6914	-5.30622
					FBgn0261294	CheB74a	-4.41706																		FBgn0039008	CG6972	4.89167
					FBgn0036805	Chmp1	2.57653																		FBgn0038285	CG6974	-4.88002
					FBgn0038180	Cht5	3.41387																		FBgn0039228	CG6980	-6.48619
					FBgn0035398	Cht7	3.50722																		FBgn0027587	CG7028	-1.07642
					FBgn0010314	Cks30A	4.12176																		FBgn0039027	CG7031	5.31066
					FBgn0033755	ClC-b	-3.43465																		FBgn0038972	CG7054	3.535
					FBgn0287234	Clect27	3.22743																		FBgn0030961	CG7058	-1.63208
					FBgn0015622	Cnx99A	1.63311																		FBgn0030091	CG7065	-2.04597
					FBgn0263911	CoVIII	2.90604																		FBgn0038849	CG7079	2.984
					FBgn0040773	CoVIIc	1.93896																		FBgn0038938	CG7084	2.85224
					FBgn0019624	CoVa	2.36091																		FBgn0032517	CG7099	-1.76743
					FBgn0037240	Cont	1.13084																		FBgn0030963	CG7101	-5.08183
					FBgn0263240	Coop	2.66154																		FBgn0030895	CG7135	3.58471
					FBgn0013770	Cp1	2.26175																		FBgn0034422	CG7137	-5.23959
					FBgn0031191	Cp110	-2.74046																		FBgn0037107	CG7166	-1.45095
					FBgn0261714	Cpn	2.386																		FBgn0032671	CG7200	-2.75729
					FBgn0015623	Cpr	2.52727																		FBgn0031942	CG7203	3.10741
					FBgn0039805	Cpr100A	4.18853																		FBgn0035861	CG7213	-3.95001
					FBgn0033602	Cpr47Ee	6.77282																		FBgn0031940	CG7214	3.03297
					FBgn0033603	Cpr47Ef	3.90197																		FBgn0033544	CG7220	1.26274
					FBgn0033725	Cpr49Ac	5.95494																		FBgn0031730	CG7236	-4.99484
					FBgn0033728	Cpr49Ae	4.18465																		FBgn0027509	CG7261	-2.7975
					FBgn0033731	Cpr49Ah	6.89131																		FBgn0030969	CG7288	-5.113
					FBgn0035280	Cpr62Bb	3.40073																		FBgn0031379	CG7289	1.97466
					FBgn0035281	Cpr62Bc	4.32778																		FBgn0031372	CG7295	-4.96626
					FBgn0042119	Cpr65Au	4.73154																		FBgn0032282	CG7299	3.92252
					FBgn0035985	Cpr67B	4.84276																		FBgn0028848	CG7311	-4.71548
					FBgn0036881	Cpr76Bd	3.35381																		FBgn0037133	CG7370	-2.76714
					FBgn0039480	Cpr97Ea	3.55525																		FBgn0036762	CG7430	1.67269
					FBgn0039481	Cpr97Eb	3.39991																		FBgn0037146	CG7470	2.16616
					FBgn0004396	CrebA	1.6886																		FBgn0033994	CG7544	-5.18753
					FBgn0025680	Cry	3.57505																		FBgn0036728	CG7580	1.49091
					FBgn0030521	CtsB1	3.10585																		FBgn0032026	CG7627	-2.34925
					FBgn0025674	CycK	-1.75341																		FBgn0036926	CG7646	-1.25931
					FBgn0004432	Cyp1	1.80661																		FBgn0038610	CG7675	2.90548
					FBgn0038681	Cyp12a4	2.78572																		FBgn0038646	CG7715	-6.18006
					FBgn0038680	Cyp12a5	3.16315																		FBgn0038652	CG7720	1.81036
					FBgn0028940	Cyp28a5	3.26018																		FBgn0033584	CG7737	-1.56225
					FBgn0001992	Cyp303a1	-2.70049																		FBgn0033616	CG7745	-2.29014
					FBgn0036910	Cyp305a1	4.7475																		FBgn0036415	CG7768	-2.1045
					FBgn0038236	Cyp313a1	1.91644																		FBgn0032025	CG7778	3.5285
					FBgn0034053	Cyp4aa1	5.14914																		FBgn0032020	CG7787	-4.60773
					FBgn0031695	Cyp4ac3	-1.58626																		FBgn0036124	CG7839	2.04051
					FBgn0031925	Cyp4d21	3.01926																		FBgn0032014	CG7840	-4.9165
					FBgn0015037	Cyp4p1	2.09638																		FBgn0036116	CG7888	2.11912
					FBgn0033397	Cyp4p3	-1.75871																		FBgn0037547	CG7910	5.15278
					FBgn0030615	Cyp4s3	-2.06599																		FBgn0028534	CG7916	-5.48678
					FBgn0015714	Cyp6a17	5.97238																		FBgn0039737	CG7920	2.7181
					FBgn0033980	Cyp6a20	3.47886																		FBgn0036416	CG7924	-5.09445
					FBgn0033981	Cyp6a21	3.55346																		FBgn0037584	CG7963	-4.95552
					FBgn0033978	Cyp6a23	2.85313																		FBgn0038115	CG7966	4.96511
					FBgn0039006	Cyp6d4	2.92977																		FBgn0028532	CG7968	-6.15337
					FBgn0038194	Cyp6d5	2.36155																		FBgn0040832	CG8012	2.72413
					FBgn0041336	Cyp6t2Psi	-3.76259																		FBgn0037606	CG8032	-2.19192
					FBgn0015039	Cyp9b2	4.26891																		FBgn0037607	CG8036	2.70893
					FBgn0038037	Cyp9f2	2.88082																		FBgn0031012	CG8051	3.03596
					FBgn0033775	Cyp9h1	5.16538																		FBgn0033891	CG8067	-5.47147
					FBgn0004629	Cys	3.39262																		FBgn0032010	CG8086	2.1659
					FBgn0264294	Cyt-b5	2.20559																		FBgn0034007	CG8102	-2.379
					FBgn0000406	Cyt-b5-r	2.44625																		FBgn0037614	CG8116	-1.64645
					FBgn0034537	DMAP1	-4.15951																		FBgn0037680	CG8121	2.26532
					FBgn0034136	Dat	3.05095																		FBgn0034008	CG8152	-2.28677
					FBgn0024804	Dbp80	-1.68755																		FBgn0034021	CG8180	1.51585
					FBgn0034246	Dcr-2	1.68217																		FBgn0030674	CG8184	1.07074
					FBgn0053531	Ddr	-1.16681																		FBgn0034030	CG8192	3.16041
					FBgn0027836	Dgp-1	-2.38999																		FBgn0034032	CG8195	-2.02553
					FBgn0032048	Dh31	2.23017																		FBgn0037624	CG8223	-2.6661
					FBgn0033744	Dh44-R2	-2.5809																		FBgn0033031	CG8245	-1.20424
					FBgn0261797	Dhc64C	1.22622																		FBgn0037716	CG8273	-1.77361
					FBgn0013813	Dhc98D	3.43865																		FBgn0034143	CG8303	2.92723
					FBgn0000463	Dl	1.80693																		FBgn0034142	CG8306	3.03447
					FBgn0263106	DnaJ-1	1.45398																		FBgn0037720	CG8312	1.46693
					FBgn0266137	Dop1R2	-1.61119																		FBgn0034140	CG8317	2.17916
					FBgn0027835	Dp1	1.92411																		FBgn0040532	CG8369	2.41887
					FBgn0033188	Drat	1.41491																		FBgn0034060	CG8370	1.62933
					FBgn0015664	Dref	-3.04025																		FBgn0034062	CG8388	-5.1273
					FBgn0010388	Dro	-5.3233																		FBgn0034067	CG8399	2.55091
					FBgn0261046	Dscam3	-2.49075																		FBgn0038235	CG8461	-3.05992
					FBgn0263219	Dscam4	-1.24044																		FBgn0037746	CG8478	-4.40835
					FBgn0278608	Dsp1	-1.23951																		FBgn0038126	CG8483	5.3739
					FBgn0283531	Duox	3.52582																		FBgn0035813	CG8492	2.76839
					FBgn0260243	E(var)3-9	-3.45861																		FBgn0033741	CG8545	1.79964
					FBgn0020445	E23	2.04719																		FBgn0033919	CG8547	2.13361
					FBgn0051159	EF-G2	-5.15373																		FBgn0031990	CG8552	1.05723
					FBgn0000559	EF2	2.53634																		FBgn0033320	CG8586	2.89234
					FBgn0026439	Eaat1	2.04244																		FBgn0035763	CG8602	1.51105
					FBgn0035624	Eaf6	-3.97551																		FBgn0033925	CG8617	-2.7391
					FBgn0027066	Eb1	-1.34803																		FBgn0038130	CG8630	3.74498
					FBgn0262579	Ect4	1.814																		FBgn0031986	CG8673	-3.75814
					FBgn0284245	Ef1alpha48D	2.52467																		FBgn0032934	CG8679	-2.17909
					FBgn0028737	Ef1beta	3.19041																		FBgn0031684	CG8680	1.65044
					FBgn0029176	Ef1gamma	2.50747																		FBgn0033257	CG8713	-3.42098
					FBgn0003731	Egfr	2.08981																		FBgn0033308	CG8736	3.90457
					FBgn0005640	Eip63E	-1.13764																		FBgn0027585	CG8740	1.90797
					FBgn0036319	Ent3	-1.6203																		FBgn0036397	CG8783	-4.22844
					FBgn0040324	Ephrin	-1.51544																		FBgn0033760	CG8785	4.3764
					FBgn0013953	Esp	3.50641																		FBgn0031476	CG8813	-5.6115
					FBgn0000592	Est-6	3.37902																		FBgn0036386	CG8833	-2.10079
					FBgn0266758	Esyt2	2.1019																		FBgn0031531	CG8840	-2.95184
					FBgn0286783	Etf-QO	2.30765																		FBgn0031664	CG8892	-4.25995
					FBgn0266667	Exo70	2.61905																		FBgn0030707	CG8916	-3.88876
					FBgn0035385	FMRFaR	-2.49458																		FBgn0030710	CG8924	-1.85919
					FBgn0000639	Fbp1	4.76322																		FBgn0038405	CG8927	3.2741
					FBgn0015222	Fer1HCH	1.37627																		FBgn0030725	CG8958	-3.43344
					FBgn0015221	Fer2LCH	1.42932																		FBgn0028920	CG8997	-4.23339
					FBgn0266084	Fhos	1.36214																		FBgn0036394	CG9040	-2.28961
					FBgn0085397	Fili	-2.56703																		FBgn0033605	CG9067	-5.15579
					FBgn0024238	Fim	-1.07453																		FBgn0030614	CG9072	-1.53082
					FBgn0010470	Fkbp14	2.16971																		FBgn0030809	CG9086	1.8009
					FBgn0033079	Fmo-2	2.57043																		FBgn0034497	CG9090	3.94291
					FBgn0260446	GABA-B-R1	-1.33162																		FBgn0035189	CG9119	2.55256
					FBgn0038149	GILT1	3.04984																		FBgn0030634	CG9164	-1.38197
					FBgn0040322	GNBP2	3.50724																		FBgn0030716	CG9170	-1.47497
					FBgn0027790	GV1	2.54695																		FBgn0028513	CG9254	-1.66242
					FBgn0033153	Gadd45	-3.67556																		FBgn0032910	CG9265	-1.94574
					FBgn0001104	Galphai	2.20021																		FBgn0032908	CG9270	-5.31554
					FBgn0001091	Gapdh1	2.39352																		FBgn0030672	CG9281	1.18946
					FBgn0029667	Gas8	-3.1516																		FBgn0038181	CG9297	4.61745
					FBgn0026077	Gasp	3.30774																		FBgn0032511	CG9306	1.49621
					FBgn0004623	Gbeta76C	2.02026																		FBgn0034681	CG9308	-2.34382
					FBgn0010225	Gel	2.49765																		FBgn0038179	CG9312	3.28165
					FBgn0036850	Gem2	-6.22042																		FBgn0032061	CG9314	-4.64439
					FBgn0262869	Gfrl	-1.56525																		FBgn0032897	CG9336	3.34066
					FBgn0035266	Gk	2.92675																		FBgn0036891	CG9372	3.22744
					FBgn0004618	Gl	1.4664																		FBgn0036893	CG9376	-5.33259
					FBgn0066114	GlcAT-I	-3.09748																		FBgn0037708	CG9386	-2.88489
					FBgn0038934	Gld2	-1.93499																		FBgn0030562	CG9400	3.27218
					FBgn0001987	Gli	2.53108																		FBgn0033092	CG9422	-2.24599
					FBgn0001114	Glt	2.72179																		FBgn0036876	CG9451	3.0447
					FBgn0004619	GluRIA	-1.37746																		FBgn0032068	CG9466	24.2022
					FBgn0264000	GluRIB	-1.23258																		FBgn0034618	CG9485	2.27615
					FBgn0264574	Glut1	-1.11058																		FBgn0031801	CG9498	3.2989
					FBgn0004507	GlyP	1.54205																		FBgn0030598	CG9503	-2.12394
					FBgn0266064	GlyS	1.68538																		FBgn0030593	CG9512	2.07289
					FBgn0265191	Glycogenin	1.50862																		FBgn0030592	CG9514	-1.61733
					FBgn0027287	Gmap	1.14112																		FBgn0030590	CG9518	-3.09255
					FBgn0038074	Gnmt	2.90687																		FBgn0030588	CG9521	-1.60117
					FBgn0034854	Golgin245	1.08992																		FBgn0030587	CG9522	-2.20716
					FBgn0001125	Got2	2.74619																		FBgn0031813	CG9527	1.83696
					FBgn0013272	Gp150	3.11674																		FBgn0031822	CG9548	-3.97547
					FBgn0001128	Gpdh	1.14227																		FBgn0031085	CG9570	-4.00881
					FBgn0022160	Gpo-1	1.96571																		FBgn0038166	CG9588	3.59164
					FBgn0260798	Gprk1	-1.57899																		FBgn0038365	CG9593	-4.69304
					FBgn0041231	Gr68a	-3.33575																		FBgn0040529	CG9603	1.73521
					FBgn0052693	Gr9a	-5.15515																		FBgn0037565	CG9626	3.07636
					FBgn0001134	Grd	-2.42405																		FBgn0036433	CG9628	1.36392
					FBgn0001612	Grip91	-2.04339																		FBgn0036857	CG9629	3.10107
					FBgn0261278	Grp	3.69377																		FBgn0027563	CG9631	3.59899
					FBgn0001145	Gs2	3.10249																		FBgn0027528	CG9634	2.13894
					FBgn0001149	GstD1	2.77787																		FBgn0038211	CG9649	3.52636
					FBgn0027590	GstE12	2.06644																		FBgn0029939	CG9650	-2.174
					FBgn0063494	GstE6	5.2735																		FBgn0031516	CG9663	1.48674
					FBgn0035906	GstO2	2.27677																		FBgn0030777	CG9672	-5.37752
					FBgn0010226	GstS1	3.44979																		FBgn0030158	CG9686	3.12339
					FBgn0030484	GstT4	2.73557																		FBgn0036654	CG9692	-2.15822
					FBgn0013973	Gycbeta100B	-1.25988																		FBgn0039784	CG9698	-4.40311
					FBgn0031107	HERC2	2.27881																		FBgn0039754	CG9747	2.91112
					FBgn0261283	HLH106	1.80733																		FBgn0034617	CG9754	-3.85128
					FBgn0046706	Haspin	-1.51605																		FBgn0036259	CG9760	-1.89821
					FBgn0038251	Hexim	-5.67538																		FBgn0027866	CG9776	1.24251
					FBgn0030900	Him	-5.45198																		FBgn0037230	CG9780	-2.03589
					FBgn0022786	Hira	-2.56156																		FBgn0030763	CG9782	3.44809
					FBgn0013981	His4r	1.39807																		FBgn0034860	CG9812	2.11638
					FBgn0010611	Hmgs	-2.43391																		FBgn0037637	CG9836	1.58188
					FBgn0029167	Hml	2.3267																		FBgn0037635	CG9837	-1.57895
					FBgn0015737	Hmu	1.9925																		FBgn0034803	CG9849	-3.36814
					FBgn0001208	Hn	3.12143																		FBgn0034903	CG9850	2.78446
					FBgn0038755	Hs6st	-1.39635																		FBgn0030743	CG9921	-3.17374
					FBgn0001216	Hsc70-1	1.97632																		FBgn0032472	CG9928	3.14925
					FBgn0266599	Hsc70-4	1.67965																		FBgn0032467	CG9934	1.73871
					FBgn0001225	Hsp26	-5.95709																		FBgn0035380	CG9970	-5.5118
					FBgn0001226	Hsp27	-3.23353																		FBgn0034435	CG9975	-1.84371
					FBgn0013278	Hsp70Bb	-2.05382																		FBgn0039594	CG9990	1.51508
					FBgn0001234	Hsromega	-1.75072																		FBgn0039273	CG9996	-4.40183
					FBgn0261624	I-3	-2.24103																		FBgn0045761	CHKov1	3.66957
					FBgn0031294	IA-2	1.54379																		FBgn0039328	CHKov2	2.1701
					FBgn0034329	IM1	3.10409																		FBgn0029503	CHORD	-3.77885
					FBgn0025583	IM2	3.07562																		FBgn0035282	CNMa	4.16971
					FBgn0040736	IM3	3.06504																		FBgn0046776	CR14033	-3.95517
					FBgn0026415	Idgf4	3.78205																		FBgn0040554	CR17025	-2.05484
					FBgn0044049	Ilp4	-3.5767																		FBgn0050055	CR30055	-1.87261
					FBgn0001255	ImpE3	-2.72855																		FBgn0050121	CR30121	-3.1332
					FBgn0001257	ImpL2	1.79202																		FBgn0051386	CR31386	-5.12002
					FBgn0086613	Ino80	-2.54899																		FBgn0051451	CR31451	1.87534
					FBgn0027106	Inx7	-6.04787																		FBgn0051781	CR31781	3.49478
					FBgn0039879	Ir100a	-3.2898																		FBgn0052009	CR32009	-5.06021
					FBgn0033515	Ir47a	-2.20572																		FBgn0052218	CR32218	-2.05148
					FBgn0265141	Ir47b	-5.25879																		FBgn0052636	CR32636	-3.51029
					FBgn0050125	Ir56a	-2.36504																		FBgn0052690	CR32690	-5.73477
					FBgn0036150	Ir68a	-3.599																		FBgn0047092	CR32730	-4.95243
					FBgn0038465	Irc	2.22993																		FBgn0052773	CR32773	-3.85086
					FBgn0024957	Irp-1B	2.01572																		FBgn0053218	CR33218	-6.07785
					FBgn0028424	JhI-26	3.32535																		FBgn0053317	CR33317	-2.74046
					FBgn0010053	Jheh1	4.75845																		FBgn0053797	CR33797	-5.90187
					FBgn0034405	Jheh2	2.82909																		FBgn0085314	CR34285	-5.22334
					FBgn0027338	Kap-alpha3	1.3586																		FBgn0267910	CR34335	-7.24845
					FBgn0087013	Karybeta3	1.41749																		FBgn0058100	CR40100	-5.51218
					FBgn0053182	Kdm4B	-1.75803																		FBgn0058172	CR40172	4.69421
					FBgn0039925	Kif3C	-2.1325																		FBgn0085732	CR40190	-5.06442
					FBgn0052179	Krn	-2.12202																		FBgn0058461	CR40461	-6.10979
					FBgn0041627	Ku80	-5.94348																		FBgn0058469	CR40469	3.1919
					FBgn0032850	Kua	-2.88365																		FBgn0085764	CR40668	4.16958
					FBgn0267825	L	2.02244																		FBgn0085766	CR40679	2.66552
					FBgn0027611	LM408	2.11776																		FBgn0085777	CR40959	2.35998
					FBgn0053087	LRP1	1.11383																		FBgn0085799	CR41544	5.81641
					FBgn0011638	La	-3.41465																		FBgn0085807	CR41590	2.34868
					FBgn0010397	LamC	1.62807																		FBgn0260718	CR42545	-5.0793
					FBgn0002526	LanA	2.15202																		FBgn0261638	CR42721	-6.93904
					FBgn0261800	LanB1	2.20753																		FBgn0261709	CR42746	-2.56724
					FBgn0267348	LanB2	3.02654																		FBgn0262353	CR43051	-1.42975
					FBgn0033984	Lap1	-1.60794																		FBgn0262543	CR43097	-2.90694
					FBgn0000464	Lar	-1.08537																		FBgn0262631	CR43148	-6.05462
					FBgn0016675	Lectin-galC1	-3.98046																		FBgn0262681	CR43151	-3.28666
					FBgn0030506	Lig4	-4.28498																		FBgn0262690	CR43160	-4.64467
					FBgn0036376	Liprin-beta	2.59139																		FBgn0262903	CR43258	29.2495
					FBgn0033593	Listericin	4.40432																		FBgn0262945	CR43264	-6.13857
					FBgn0039114	Lsd-1	1.87888																		FBgn0263325	CR43406	-3.25473
					FBgn0030608	Lsd-2	2.0036																		FBgn0263327	CR43408	-2.36678
					FBgn0034962	MAN1	-2.53759																		FBgn0263330	CR43411	-4.79806
					FBgn0035145	MED14	-2.7586																		FBgn0263332	CR43413	-3.9195
					FBgn0040020	MED21	-1.5987																		FBgn0263381	CR43433	-5.92984
					FBgn0038760	MED25	-3.45643																		FBgn0263413	CR43459	-1.20141
					FBgn0058263	MFS17	-1.81123																		FBgn0263414	CR43460	-2.17338
					FBgn0031307	MFS3	-5.91871																		FBgn0263441	CR43464	-2.42478
					FBgn0262741	MRE23	-3.25458																		FBgn0263445	CR43468	-3.08751
					FBgn0030703	MSBP	2.0636																		FBgn0263449	CR43472	-4.63161
					FBgn0267861	Maf1	-1.65445																		FBgn0263453	CR43476	-7.27895
					FBgn0032382	Mal-B2	-1.59334																		FBgn0263457	CR43480	-1.41738
					FBgn0010342	Map60	3.71344																		FBgn0263499	CR43488	-2.2067
					FBgn0032116	Mco1	2.96402																		FBgn0263504	CR43493	-1.94006
					FBgn0267488	Mcr	1.15946																		FBgn0263506	CR43495	-2.80517
					FBgn0023549	Mct1	1.58135																		FBgn0263802	CR43605	-1.98627
					FBgn0262782	Mdh1	2.53815																		FBgn0263581	CR43606	-1.846
					FBgn0262559	Mdh2	2.11056																		FBgn0263582	CR43607	-2.29563
					FBgn0004512	Mdr49	2.91685																		FBgn0263583	CR43608	-6.32147
					FBgn0004513	Mdr65	3.03492																		FBgn0263584	CR43609	-2.96913
					FBgn0002719	Men	2.17784																		FBgn0263587	CR43612	-6.53155
					FBgn0086384	Mer	2.15663																		FBgn0263611	CR43620	-4.14597
					FBgn0037207	Mes2	2.21592																		FBgn0263615	CR43624	-7.36483
					FBgn0034726	Mes4	-3.68227																		FBgn0263619	CR43628	-4.5022
					FBgn0039650	Mesh1	-17.2813																		FBgn0263660	CR43651	-1.24636
					FBgn0038294	Mf	2.50171																		FBgn0263662	CR43653	-3.8645
					FBgn0034521	Mgat1	-2.95744																		FBgn0263663	CR43654	-1.45574
					FBgn0264695	Mhc	3.22246																		FBgn0263665	CR43656	-3.32844
					FBgn0262519	Mi-2	1.12475																		FBgn0263708	CR43660	-5.26108
					FBgn0026061	Mipp1	3.42563																		FBgn0263709	CR43661	-2.35766
					FBgn0002772	Mlc1	3.2568																		FBgn0263744	CR43669	-5.22986
					FBgn0002773	Mlc2	3.5443																		FBgn0263843	CR43704	-6.20442
					FBgn0259209	Mlp60A	2.48535																		FBgn0263870	CR43717	-5.33637
					FBgn0035049	Mmp1	2.27582																		FBgn0263872	CR43719	-2.80348
					FBgn0011661	Moe	2.34267																		FBgn0265017	CR43751	-5.354
					FBgn0002789	Mp20	4.08484																		FBgn0264266	CR43766	-3.55231
					FBgn0026409	Mpcp	1.27503																		FBgn0264328	CR43787	-2.46431
					FBgn0264002	MsR2	-2.02764																		FBgn0264336	CR43792	-2.79471
					FBgn0261836	Msp300	1.31138																		FBgn0264347	CR43803	-2.17615
					FBgn0015766	Msr-110	3.3365																		FBgn0264348	CR43804	-2.66633
					FBgn0028412	Mst33A	-4.67158																		FBgn0264350	CR43806	-2.95278
					FBgn0086915	Mst77F	-2.4524																		FBgn0264369	CR43821	-4.01483
					FBgn0028479	Mtpalpha	3.27153																		FBgn0264374	CR43826	-4.01013
					FBgn0033402	Myd88	1.60764																		FBgn0264375	CR43827	-3.82501
					FBgn0263705	Myo10A	2.2768																		FBgn0264376	CR43828	-3.3512
					FBgn0010246	Myo61F	3.95132																		FBgn0264379	CR43831	-6.652
					FBgn0010488	NAT1	1.20085																		FBgn0264380	CR43832	-5.85398
					FBgn0017566	ND75	1.84896																		FBgn0264384	CR43836	-1.99446
					FBgn0027785	NP15.6	3.06021																		FBgn0264394	CR43842	-6.01691
					FBgn0027109	NPF	6.05934																		FBgn0264427	CR43845	-2.46348
					FBgn0024947	NTPase	1.39227																		FBgn0264431	CR43849	-3.58203
					FBgn0085434	NaCP60E	-1.18156																		FBgn0264437	CR43855	-3.25121
					FBgn0051216	Naam	-2.88232																		FBgn0264447	CR43865	-5.15337
					FBgn0015268	Nap1	1.93486																		FBgn0264470	CR43878	-2.32852
					FBgn0010352	Nc73EF	1.11895																		FBgn0264473	CR43881	-4.54974
					FBgn0032725	Nedd8	-6.35349																		FBgn0264476	CR43884	-4.84131
					FBgn0038818	Nep4	2.72919																		FBgn0264481	CR43889	-1.86283
					FBgn0037447	Neurochondrin	4.97204																		FBgn0264482	CR43890	-4.52636
					FBgn0035993	Nf-YA	-2.19422																		FBgn0264485	CR43893	-2.22559
					FBgn0040297	Nhe2	-1.14773																		FBgn0264500	CR43899	-5.71133
					FBgn0026402	NiPp1	3.09319																		FBgn0264573	CR43945	-4.49913
					FBgn0036101	NijA	2.7129																		FBgn0264602	CR43951	-1.94674
					FBgn0260011	NimC4	-2.85887																		FBgn0264616	CR43956	-3.37094
					FBgn0083975	Nlg4	-1.34563																		FBgn0264674	CR43959	-1.93258
					FBgn0010399	Nmdar1	-2.03924																		FBgn0264697	CR43966	-2.81771
					FBgn0033224	Nop17l	-1.53347																		FBgn0264701	CR43970	-3.10069
					FBgn0024320	Npc1a	1.08402																		FBgn0264703	CR43972	-2.48506
					FBgn0039801	Npc2h	3.94864																		FBgn0264723	CR43991	-1.74258
					FBgn0287423	Nplp2	3.08828																		FBgn0264787	CR44017	-3.06451
					FBgn0042201	Nplp3	3.52655																		FBgn0264788	CR44018	-2.69678
					FBgn0032251	Nse4	-3.72904																		FBgn0264789	CR44019	-1.82141
					FBgn0011280	Obp19d	3.64383																		FBgn0264792	CR44022	-2.03137
					FBgn0034471	Obp56e	4.1288																		FBgn0264793	CR44023	-3.46347
					FBgn0004514	Oct-TyrR	-2.75359																		FBgn0264794	CR44024	-1.44343
					FBgn0038980	Octbeta1R	-1.26559																		FBgn0264821	CR44029	-2.18243
					FBgn0250910	Octbeta3R	-1.63392																		FBgn0264833	CR44041	-5.89596
					FBgn0013307	Odc1	3.17159																		FBgn0264834	CR44042	-4.17857
					FBgn0033404	Or45a	-1.45193																		FBgn0264835	CR44043	-1.96732
					FBgn0034866	Or59c	-6.51997																		FBgn0264838	CR44046	-3.51402
					FBgn0067407	Or98P	-5.4282																		FBgn0264842	CR44050	-4.53045
					FBgn0039551	Or98a	-2.657																		FBgn0264843	CR44051	-3.69382
					FBgn0032015	Ostgamma	-5.90948																		FBgn0264864	CR44055	-4.41693
					FBgn0033088	PGAP3	-3.00791																		FBgn0264865	CR44056	-2.53423
					FBgn0267350	PI4KIIIalpha	1.54542																		FBgn0264878	CR44069	-3.00873
					FBgn0032447	PICK1	-6.17286																		FBgn0264882	CR44073	-5.9721
					FBgn0265190	PIG-S	-5.8399																		FBgn0264901	CR44092	-1.97066
					FBgn0038201	PK1-R	2.93868																		FBgn0264940	CR44109	-3.31666
					FBgn0010247	Parp	-1.31182																		FBgn0264942	CR44111	-3.21361
					FBgn0016693	Past1	1.52641																		FBgn0264945	CR44114	-3.11605
					FBgn0041789	Pax	2.01147																		FBgn0264950	CR44119	-3.82715
					FBgn0003042	Pc	-1.77996																		FBgn0264987	CR44138	-4.22732
					FBgn0003044	Pcl	-1.84859																		FBgn0264999	CR44150	-5.22936
					FBgn0264815	Pde1c	-1.26194																		FBgn0265039	CR44156	-3.40214
					FBgn0011693	Pdh	2.21291																		FBgn0265040	CR44157	-3.53489
					FBgn0286818	Pdi	3.11972																		FBgn0265044	CR44161	-2.47687
					FBgn0017558	Pdk	1.40374																		FBgn0265051	CR44166	-6.14281
					FBgn0011695	PebIII	3.2544																		FBgn0265059	CR44170	-3.55945
					FBgn0267727	Pen	3.52366																		FBgn0265060	CR44171	-3.78498
					FBgn0031799	Pez	1.8983																		FBgn0265067	CR44178	-1.83662
					FBgn0250906	Pgk	2.18655																		FBgn0265074	CR44185	-4.88676
					FBgn0014869	Pglym78	2.3612																		FBgn0265076	CR44187	-1.47757
					FBgn0024315	Picot	1.86535																		FBgn0265077	CR44188	-4.24474
					FBgn0016926	Pino	1.30311																		FBgn0265149	CR44218	-1.85183
					FBgn0259680	Pkcdelta	2.06435																		FBgn0265151	CR44220	-4.38663
					FBgn0032401	Plzf	-2.16915																		FBgn0265152	CR44221	-3.47103
					FBgn0031069	Pmp70	1.75115																		FBgn0265163	CR44232	-1.94859
					FBgn0283467	Pol32	-6.12793																		FBgn0265164	CR44233	-4.33454
					FBgn0003132	Pp1-13C	-4.1529																		FBgn0265306	CR44279	-4.56162
					FBgn0004103	Pp1-87B	1.34835																		FBgn0265341	CR44295	-2.14562
					FBgn0260439	Pp2A-29B	1.07968																		FBgn0265345	CR44299	-2.97361
					FBgn0003149	Prm	3.78031																		FBgn0265346	CR44300	-2.87783
					FBgn0250746	Prosbeta7	3.69194																		FBgn0265347	CR44301	-3.60314
					FBgn0033520	Prx2540-1	3.51952																		FBgn0265348	CR44302	-5.41191
					FBgn0033518	Prx2540-2	5.66307																		FBgn0265379	CR44320	-4.05291
					FBgn0261243	Psa	1.97226																		FBgn0265419	CR44331	-2.40833
					FBgn0026379	Pten	-1.45364																		FBgn0265420	CR44332	-4.20072
					FBgn0267486	Ptp36E	-1.43432																		FBgn0265448	CR44348	-1.80239
					FBgn0020912	Ptx1	2.43602																		FBgn0265467	CR44360	-3.08329
					FBgn0085407	Pvf3	-1.67806																		FBgn0265497	CR44366	-3.15197
					FBgn0004577	Pxd	3.29909																		FBgn0265511	CR44373	-2.91611
					FBgn0267385	PyK	1.76504																		FBgn0265534	CR44384	-2.07009
					FBgn0065098	RNaseMRP:RNA	2.73998																		FBgn0265540	CR44390	-3.38335
					FBgn0004842	RYa-R	-3.55024																		FBgn0265544	CR44394	-5.92821
					FBgn0030613	Rab3-GEF	-1.31511																		FBgn0265545	CR44395	-2.48081
					FBgn0052673	Rab9E	-3.98909																		FBgn0265546	CR44396	-3.0922
					FBgn0003206	Ras64B	1.67425																		FBgn0265582	CR44409	-4.86599
					FBgn0038128	Ravus	-6.07713																		FBgn0265585	CR44412	-5.82856
					FBgn0261064	Rbsn-5	-7.14557																		FBgn0265592	CR44419	-2.74105
					FBgn0037012	Rcd2	1.85481																		FBgn0265638	CR44445	-4.74467
					FBgn0032034	Rcd4	-5.34929																		FBgn0265665	CR44472	-5.77983
					FBgn0015801	Reg-5	2.68852																		FBgn0265666	CR44473	-1.49891
					FBgn0014018	Rel	1.94849																		FBgn0265667	CR44474	-4.55908
					FBgn0026378	Rep	-5.49755																		FBgn0265685	CR44492	-3.4421
					FBgn0260985	RfC4	-5.95573																		FBgn0265686	CR44493	-3.09497
					FBgn0087002	Rfabg	1.94664																		FBgn0265689	CR44496	-7.28316
					FBgn0003248	Rh2	2.30996																		FBgn0265691	CR44498	-2.94749
					FBgn0003249	Rh3	2.57778																		FBgn0265806	CR44595	-5.13832
					FBgn0028699	Rh50	1.76405																		FBgn0265823	CR44612	-2.30945
					FBgn0041191	Rheb	1.68186																		FBgn0265853	CR44642	-2.19373
					FBgn0039883	RhoGAP100F	-1.37124																		FBgn0265871	CR44660	-2.40061
					FBgn0023172	RhoGEF2	1.04631																		FBgn0265873	CR44662	-3.91822
					FBgn0027335	Rip11	1.62044																		FBgn0265928	CR44717	-5.4682
					FBgn0014022	Rlb1	-2.98016																		FBgn0265957	CR44744	-2.09983
					FBgn0051719	RluA-1	2.07381																		FBgn0265997	CR44772	-4.12699
					FBgn0015477	Rme-8	1.23399																		FBgn0266005	CR44779	-1.78077
					FBgn0010407	Ror	-4.07349																		FBgn0266008	CR44781	-7.04448
					FBgn0005649	Rox8	1.12777																		FBgn0266046	CR44811	-2.59894
					FBgn0036213	RpL10Ab	2.16585																		FBgn0266072	CR44825	-4.05756
					FBgn0034968	RpL12	2.32337																		FBgn0266086	CR44828	-4.97381
					FBgn0037351	RpL13A	3.00231																		FBgn0266097	CR44834	-5.71735
					FBgn0017579	RpL14	2.41355																		FBgn0266115	CR44841	-5.16576
					FBgn0028697	RpL15	1.59428																		FBgn0266138	CR44844	-2.58502
					FBgn0029897	RpL17	2.45009																		FBgn0266142	CR44848	-2.75618
					FBgn0035753	RpL18	2.66063																		FBgn0266145	CR44851	-7.05709
					FBgn0010409	RpL18A	2.55054																		FBgn0266162	CR44868	-4.21066
					FBgn0010078	RpL23	3.10501																		FBgn0266164	CR44870	-4.57712
					FBgn0026372	RpL23A	1.69768																		FBgn0266167	CR44873	-5.12121
					FBgn0036825	RpL26	3.39774																		FBgn0266182	CR44888	-5.05792
					FBgn0039359	RpL27	2.55036																		FBgn0266199	CR44894	-2.09908
					FBgn0285948	RpL27A	2.46072																		FBgn0266205	CR44900	-1.95362
					FBgn0086710	RpL30	1.9489																		FBgn0266206	CR44901	-3.28164
					FBgn0037328	RpL35A	2.07297																		FBgn0266252	CR44947	-4.33397
					FBgn0031980	RpL36A	3.51792																		FBgn0266308	CR44973	-3.67406
					FBgn0003941	RpL40	2.14012																		FBgn0266309	CR44974	-4.71381
					FBgn0066084	RpL41	2.89699																		FBgn0266310	CR44975	-5.46039
					FBgn0064225	RpL5	1.24824																		FBgn0266313	CR44978	-2.16001
					FBgn0039857	RpL6	2.11095																		FBgn0266314	CR44979	-3.13785
					FBgn0261602	RpL8	2.58018																		FBgn0266348	CR44997	-1.70856
					FBgn0002593	RpLP1	3.89052																		FBgn0266356	CR45004	-3.30141
					FBgn0003274	RpLP2	2.87731																		FBgn0266378	CR45020	-4.73149
					FBgn0027494	RpS10a	-5.25228																		FBgn0266389	CR45029	-1.80339
					FBgn0033699	RpS11	2.18434																		FBgn0266390	CR45030	-1.76185
					FBgn0286213	RpS12	2.5703																		FBgn0266392	CR45032	-2.90149
					FBgn0010265	RpS13	2.00824																		FBgn0266394	CR45034	-4.54304
					FBgn0010198	RpS15Aa	2.21011																		FBgn0266403	CR45043	-7.79702
					FBgn0010411	RpS18	2.47703																		FBgn0266408	CR45048	-1.90352
					FBgn0010412	RpS19a	1.7536																		FBgn0266414	CR45054	-1.39004
					FBgn0033912	RpS23	3.27334																		FBgn0266416	CR45056	-4.63208
					FBgn0261596	RpS24	2.81356																		FBgn0266592	CR45117	-3.53397
					FBgn0039300	RpS27	2.03911																		FBgn0266593	CR45118	-3.36716
					FBgn0261599	RpS29	1.59003																		FBgn0266595	CR45120	-1.32875
					FBgn0002622	RpS3	2.14613																		FBgn0266618	CR45125	-3.45985
					FBgn0017545	RpS3A	1.61649																		FBgn0266619	CR45126	-1.35601
					FBgn0011284	RpS4	2.2999																		FBgn0266621	CR45128	-4.42603
					FBgn0261592	RpS6	2.13608																		FBgn0266627	CR45134	-5.3634
					FBgn0039757	RpS7	2.13913																		FBgn0266629	CR45136	-4.4429
					FBgn0039713	RpS8	1.84038																		FBgn0266630	CR45137	-1.91309
					FBgn0033886	Rpn13	1.82385																		FBgn0266648	CR45155	-5.2482
					FBgn0028692	Rpn2	2.41243																		FBgn0266651	CR45158	-3.39789
					FBgn0261396	Rpn3	2.29549																		FBgn0266652	CR45159	-3.20569
					FBgn0028690	Rpn5	1.6531																		FBgn0266677	CR45167	-4.53596
					FBgn0028689	Rpn6	2.2518																		FBgn0266680	CR45170	-1.31954
					FBgn0002787	Rpn8	2.19894																		FBgn0266687	CR45177	-5.3609
					FBgn0028691	Rpn9	2.22589																		FBgn0266688	CR45178	-2.01518
					FBgn0015282	Rpt2	1.83626																		FBgn0266690	CR45180	-2.99319
					FBgn0028686	Rpt3	1.8058																		FBgn0266699	CR45189	-3.68382
					FBgn0083981	RunxA	-1.88																		FBgn0266726	CR45199	-4.86133
					FBgn0259162	RunxB	-5.28243																		FBgn0266730	CR45203	-1.41346
					FBgn0020617	Rx	3.13951																		FBgn0266735	CR45208	-4.67123
					FBgn0035915	S-Lap1	2.40199																		FBgn0266736	CR45209	-3.41819
					FBgn0035298	SCOT	3.94716																		FBgn0266737	CR45210	-3.58122
					FBgn0038880	SIFaR	-1.74656																		FBgn0266744	CR45217	-2.43415
					FBgn0029761	SK	-1.39689																		FBgn0266750	CR45223	-1.96115
					FBgn0263236	SP1029	1.78436																		FBgn0266751	CR45224	-1.77193
					FBgn0035710	SP1173	2.68377																		FBgn0266753	CR45226	-3.44913
					FBgn0033785	Sans	6.04959																		FBgn0266762	CR45227	-5.69153
					FBgn0000416	Sap-r	2.2887																		FBgn0266772	CR45237	-2.25791
					FBgn0038947	Sar1	1.73021																		FBgn0266819	CR45281	-2.28751
					FBgn0026369	Sara	2.07163																		FBgn0266851	CR45312	-2.49329
					FBgn0003330	Sce	2.40875																		FBgn0266864	CR45325	-5.14275
					FBgn0032013	Scgalpha	-3.02578																		FBgn0266871	CR45332	-2.24828
					FBgn0025391	Scgdelta	-1.51731																		FBgn0266872	CR45333	-3.3647
					FBgn0030357	Sclp	3.85274																		FBgn0266886	CR45347	-2.46612
					FBgn0020907	Scp2	1.51447																		FBgn0266889	CR45350	-3.04055
					FBgn0261439	SdhA	1.42381																		FBgn0266911	CR45371	-2.92305
					FBgn0030350	SelG	3.40912																		FBgn0266931	CR45382	-1.94776
					FBgn0016059	Sema-1b	1.14443																		FBgn0266936	CR45387	-4.94931
					FBgn0019929	Ser7	3.74496																		FBgn0266937	CR45388	-3.09416
					FBgn0034897	Sesn	1.46796																		FBgn0266978	CR45429	-2.9652
					FBgn0003380	Sh	-1.41615																		FBgn0266979	CR45430	-2.96775
					FBgn0005564	Shal	-1.30008																		FBgn0266980	CR45431	-6.57889
					FBgn0010620	Sip1	2.76851																		FBgn0266984	CR45435	-4.99644
					FBgn0038788	Sirt2	2.90852																		FBgn0267012	CR45456	2.41321
					FBgn0037802	Sirt6	-5.83264																		FBgn0267020	CR45464	-2.31303
					FBgn0262717	Skeletor	2.28834																		FBgn0267023	CR45467	-2.03366
					FBgn0035968	Slc45-1	2.97449																		FBgn0267029	CR45473	-1.71161
					FBgn0024728	Slip1	-1.08757																		FBgn0267035	CR45479	-3.20382
					FBgn0265192	Snp	1.66009																		FBgn0267036	CR45480	-3.20247
					FBgn0011715	Snr1	-3.05315																		FBgn0267062	CR45506	-5.36391
					FBgn0041184	Socs36E	-1.62311																		FBgn0267078	CR45522	-4.7127
					FBgn0003462	Sod	2.78381																		FBgn0267102	CR45542	-5.72916
					FBgn0033631	Sod3	3.71974																		FBgn0267107	CR45547	-4.61118
					FBgn0022359	Sodh-2	4.07717																		FBgn0267116	CR45556	-4.40526
					FBgn0053329	Sp212	3.98537																		FBgn0267117	CR45557	-1.86696
					FBgn0039172	Spase22-23	-4.30379																		FBgn0267181	CR45621	-3.25645
					FBgn0030306	Spase25	3.77123																		FBgn0267228	CR45668	-3.54491
					FBgn0024293	Spn43Ab	2.66237																		FBgn0267230	CR45670	-2.85441
					FBgn0052203	Spn75F	-3.19554																		FBgn0267243	CR45683	-3.50118
					FBgn0262057	Spn77Ba	2.72835																		FBgn0267244	CR45684	-4.57228
					FBgn0028984	Spn88Ea	3.28988																		FBgn0267263	CR45699	-3.87434
					FBgn0011509	SrpRbeta	-5.72617																		FBgn0267264	CR45700	-4.72128
					FBgn0035627	Sse	-1.64486																		FBgn0267270	CR45706	-3.64232
					FBgn0031054	Ssu72	-2.22471																		FBgn0267272	CR45708	4.53058
					FBgn0265045	Strn-Mlck	3.17344																		FBgn0267304	CR45740	-4.67832
					FBgn0003598	Su(var)3-7	1.78178																		FBgn0267322	CR45758	-2.32299
					FBgn0038504	Sur-8	-1.17672																		FBgn0267323	CR45759	-3.07782
					FBgn0019925	Surf4	2.01934																		FBgn0267399	CR45761	-3.66711
					FBgn0034709	Swim	2.61906																		FBgn0267400	CR45762	-4.37854
					FBgn0264270	Sxl	-1.43958																		FBgn0267443	CR45793	-2.80381
					FBgn0053094	Synd	1.38956																		FBgn0267448	CR45798	-5.66455
					FBgn0261086	Syt14	-1.33466																		FBgn0267454	CR45804	-1.75926
					FBgn0039900	Syt7	-1.54032																		FBgn0267457	CR45807	-2.47285
					FBgn0286784	TER94	1.27967																		FBgn0267458	CR45808	-1.6203
					FBgn0028399	TMS1	1.57472																		FBgn0267459	CR45809	-2.31164
					FBgn0086358	Tab2	1.90733																		FBgn0267460	CR45810	-3.23461
					FBgn0033902	Tango7	2.18302																		FBgn0267461	CR45811	-2.52348
					FBgn0021795	Tapdelta	2.72444																		FBgn0267470	CR45820	-1.74649
					FBgn0243586	Tb	-3.50798																		FBgn0267472	CR45822	-4.89438
					FBgn0010329	Tbh	-1.62622																		FBgn0267475	CR45825	-1.68417
					FBgn0037874	Tctp	1.58906																		FBgn0267482	CR45832	-4.80901
					FBgn0036450	Tdrd3	2.36908																		FBgn0267526	CR45866	-5.68277
					FBgn0037766	Teh1	-2.28103																		FBgn0267536	CR45876	-3.30856
					FBgn0026760	Tehao	-1.86744																		FBgn0267537	CR45877	-6.03852
					FBgn0041182	Tep2	2.40337																		FBgn0267538	CR45878	-2.66954
					FBgn0041181	Tep3	3.6893																		FBgn0267540	CR45880	-5.9073
					FBgn0041180	Tep4	2.77668																		FBgn0267541	CR45881	-1.95042
					FBgn0023479	Tequila	2.53724																		FBgn0267544	CR45884	-4.36153
					FBgn0031975	Tg	4.52544																		FBgn0267558	CR45898	-5.06761
					FBgn0025352	Thiolase	3.0622																		FBgn0267561	CR45901	-4.11289
					FBgn0011722	Tig	2.85839																		FBgn0267563	CR45903	-3.38301
					FBgn0025879	Timp	1.79896																		FBgn0267566	CR45906	-1.5351
					FBgn0011837	Tis11	1.65156																		FBgn0267567	CR45907	-5.06048
					FBgn0037976	Tk	3.43167																		FBgn0267570	CR45910	-1.81186
					FBgn0004622	TkR99D	-3.15354																		FBgn0267571	CR45911	-3.27847
					FBgn0004117	Tm2	3.55025																		FBgn0267576	CR45916	-2.1935
					FBgn0036494	Toll-6	-1.28126																		FBgn0267578	CR45918	-3.27902
					FBgn0029114	Tollo	2.08836																		FBgn0267579	CR45919	-3.65315
					FBgn0044811	TotF	-6.45686																		FBgn0267582	CR45922	-2.39523
					FBgn0037852	Tpc1	-1.86457																		FBgn0267587	CR45925	-4.94048
					FBgn0031692	TpnC25D	3.85626																		FBgn0267600	CR45938	-2.45838
					FBgn0010424	TpnC73F	4.83693																		FBgn0267601	CR45939	-2.04785
					FBgn0020370	TppII	2.00395																		FBgn0267602	CR45940	-2.68804
					FBgn0027560	Tps1	2.79183																		FBgn0267603	CR45941	-1.74651
					FBgn0038327	Trax	-5.77338																		FBgn0267607	CR45945	-3.75495
					FBgn0011584	Trp1	1.72595																		FBgn0267611	CR45949	-4.36688
					FBgn0032593	Trpgamma	-4.42468																		FBgn0267619	CR45957	-3.44327
					FBgn0037170	Trxr-2	-3.01621																		FBgn0267621	CR45959	-3.39711
					FBgn0022355	Tsf1	4.44787																		FBgn0267622	CR45960	-4.89549
					FBgn0031850	Tsp	2.13774																		FBgn0267623	CR45961	-3.13073
					FBgn0029507	Tsp42Ed	4.30469																		FBgn0267624	CR45962	-1.89102
					FBgn0029506	Tsp42Ee	2.27894																		FBgn0267627	CR45965	-2.20627
					FBgn0033134	Tsp42El	2.78037																		FBgn0267628	CR45966	-4.32535
					FBgn0036769	Tsp74F	2.78033																		FBgn0267629	CR45967	-5.20586
					FBgn0029170	TwdlT	2.90339																		FBgn0267634	CR45972	-2.36351
					FBgn0052569	TwdlZ	-6.24302																		FBgn0267638	CR45976	-1.80981
					FBgn0017457	U2af38	3.02982																		FBgn0267644	CR45982	-2.5446
					FBgn0053505	U3-55K	-18.2514																		FBgn0267653	CR45991	-5.45922
					FBgn0016756	Ubp64E	1.86941																		FBgn0267655	CR45993	-4.75509
					FBgn0010288	Uch	4.94392																		FBgn0267656	CR45994	-2.33641
					FBgn0039226	Ude	5.01889																		FBgn0267665	CR46003	-2.2525
					FBgn0014075	Ugt	1.77956																		FBgn0267666	CR46004	-2.8692
					FBgn0040259	Ugt86Da	2.95972																		FBgn0267671	CR46007	-4.21
					FBgn0053519	Unc-89	2.88814																		FBgn0267673	CR46009	-3.62531
					FBgn0029992	Upf2	-1.73525																		FBgn0267680	CR46016	-3.11961
					FBgn0053523	Vap-33B	1.47317																		FBgn0267684	CR46020	-3.96081
					FBgn0035103	Vdup1	2.52687																		FBgn0267685	CR46021	-2.10729
					FBgn0028670	Vha100-2	2.43069																		FBgn0267686	CR46022	-6.08072
					FBgn0262736	Vha16-1	1.39125																		FBgn0267687	CR46023	-3.43013
					FBgn0283535	Vha26	1.33903																		FBgn0267688	CR46024	-2.07655
					FBgn0263598	Vha68-2	3.11846																		FBgn0267693	CR46029	-6.28023
					FBgn0262515	VhaAC45	1.65677																		FBgn0267697	CR46033	3.16535
					FBgn0053117	Victoria	-6.42207																		FBgn0267702	CR46035	-1.99217
					FBgn0004397	Vinc	2.84109																		FBgn0267703	CR46036	-3.08824
					FBgn0014076	Vm32E	-6.00706																		FBgn0267709	CR46042	-4.86736
					FBgn0033194	Vps13	1.47135																		FBgn0267710	CR46043	-3.31397
					FBgn0037231	Vps24	-2.69313																		FBgn0267722	CR46055	-5.91557
					FBgn0263512	Vsx2	-3.08279																		FBgn0267723	CR46056	-2.75723
					FBgn0031902	Wnt6	3.21011																		FBgn0267733	CR46064	-4.06811
					FBgn0004832	Xpac	-5.4227																		FBgn0267735	CR46066	-2.40352
					FBgn0026749	Yippee	-3.68968																		FBgn0267748	CR46079	-4.85799
					FBgn0004045	Yp1	3.04823																		FBgn0267753	CR46084	-2.1283
					FBgn0005391	Yp2	3.41491																		FBgn0267757	CR46088	-2.57744
					FBgn0004047	Yp3	3.01616																		FBgn0267762	CR46093	-4.18009
					FBgn0035917	Zasp66	2.84186																		FBgn0267775	CR46106	-4.01074
					FBgn0036461	Zip71B	3.00943																		FBgn0267781	CR46112	-2.06812
					FBgn0038412	Zip89B	4.56152																		FBgn0267783	CR46114	-5.0911
					FBgn0033762	ZnT49B	2.10227																		FBgn0267785	CR46116	-3.96717
					FBgn0037875	ZnT86D	3.80204																		FBgn0267786	CR46117	-3.16479
					FBgn0264442	ab	-1.36195																		FBgn0032210	CYLD	2.34188
					FBgn0000028	acj6	-2.09418																		FBgn0263006	Ca-P60A	2.20682
					FBgn0000063	ald	-4.32263																		FBgn0264607	CaMKII	-1.04919
					FBgn0015569	alpha-Est10	2.12866																		FBgn0036715	Cad74A	2.85769
					FBgn0015575	alpha-Est7	3.81881																		FBgn0261053	Cad86C	1.38991
					FBgn0250789	alpha-Spec	1.37311																		FBgn0037963	Cad87A	1.05874
					FBgn0003884	alphaTub84B	2.1904																		FBgn0039709	Cad99C	1.906
					FBgn0038535	alt	1.01336																		FBgn0262018	CadN2	-1.18672
					FBgn0000097	aop	1.25694																		FBgn0000253	Cam	1.35064
					FBgn0031458	aph-1	-4.81922																		FBgn0051989	Cap-D3	-1.96428
					FBgn0028646	aralar1	1.33338																		FBgn0000261	Cat	3.94982
					FBgn0000114	aret	-1.03051																		FBgn0004783	Ccp84Aa	4.57905
					FBgn0041164	armi	-5.32871																		FBgn0004782	Ccp84Ab	4.69506
					FBgn0000137	ase	-5.79537																		FBgn0052499	Cda4	2.15913
					FBgn0261004	asl	-6.04684																		FBgn0004107	Cdk2	-3.08823
					FBgn0032422	atilla	2.21522																		FBgn0016131	Cdk4	2.16579
					FBgn0004870	bab1	-1.618																		FBgn0013762	Cdk5	-3.55763
					FBgn0034724	babos	2.25474																		FBgn0000299	Cg25C	3.55594
					FBgn0031977	baf	-5.90293																		FBgn0000319	Chc	1.32703
					FBgn0087007	bbg	2.48629																		FBgn0035499	Chd64	1.7083
					FBgn0053179	beat-IIIb	-1.62805																		FBgn0067311	CheB38b	-4.77491
					FBgn0039089	beat-IV	-1.84255																		FBgn0066293	CheB42b	-5.19167
					FBgn0028645	beat-Ib	-2.1524																		FBgn0261294	CheB74a	-3.79679
					FBgn0028644	beat-Ic	-1.50129																		FBgn0038180	Cht5	4.67447
					FBgn0039584	beat-VI	-1.72927																		FBgn0035398	Cht7	3.27895
					FBgn0250908	beat-VII	-1.04994																		FBgn0034558	Cib2	-5.7088
					FBgn0038087	beat-Va	-2.2393																		FBgn0015024	CkIalpha	1.36098
					FBgn0038084	beat-Vc	-2.40559																		FBgn0010314	Cks30A	3.54028
					FBgn0263231	bel	1.0963																		FBgn0033755	ClC-b	-2.13966
					FBgn0250788	beta-Spec	1.47478																		FBgn0287234	Clect27	2.85901
					FBgn0003888	betaTub60D	2.32542																		FBgn0261612	CngA	-1.80736
					FBgn0027348	bgm	3.37173																		FBgn0015622	Cnx99A	1.17037
					FBgn0027660	blot	1.94517																		FBgn0261573	CoRest	-1.02974
					FBgn0283709	blue	-2.7141																		FBgn0019624	CoVa	1.97007
					FBgn0011211	blw	2.85091																		FBgn0037240	Cont	1.45086
					FBgn0001090	bnb	2.54061																		FBgn0030028	Corp	-3.18257
					FBgn0050362	boly	-2.55403																		FBgn0013770	Cp1	2.21512
					FBgn0260942	bond	3.21397																		FBgn0261714	Cpn	3.19671
					FBgn0000206	boss	2.9452																		FBgn0015623	Cpr	2.33137
					FBgn0261284	bou	3.66084																		FBgn0039805	Cpr100A	4.23302
					FBgn0283451	br	-1.24866																		FBgn0030398	Cpr11B	-2.38274
					FBgn0259246	brp	-1.12757																		FBgn0033602	Cpr47Ee	4.62023
					FBgn0000529	bsh	-5.61406																		FBgn0033603	Cpr47Ef	2.99027
					FBgn0005666	bt	3.0189																		FBgn0033725	Cpr49Ac	5.01515
					FBgn0266756	btsz	1.25123																		FBgn0033728	Cpr49Ae	4.08003
					FBgn0023096	btv	-1.80251																		FBgn0033731	Cpr49Ah	5.9879
					FBgn0011723	byn	-2.44695																		FBgn0035281	Cpr62Bc	3.71712
					FBgn0010292	bys	3.50826																		FBgn0035513	Cpr64Ad	-5.24993
					FBgn0263111	cac	-1.46436																		FBgn0042119	Cpr65Au	3.39316
					FBgn0000250	cact	1.35196																		FBgn0035985	Cpr67B	3.29745
					FBgn0031114	cactin	-4.84516																		FBgn0036881	Cpr76Bd	3.63631
					FBgn0000251	cad	-5.21292																		FBgn0037068	Cpr78Cb	-4.85334
					FBgn0017414	cag	-6.54075																		FBgn0038819	Cpr92F	2.59845
					FBgn0262166	calypso	-5.2																		FBgn0039480	Cpr97Ea	3.2152
					FBgn0040233	cana	2.5628																		FBgn0039481	Cpr97Eb	3.70176
					FBgn0000256	capu	-1.81541																		FBgn0025864	Crag	1.45815
					FBgn0026257	cav	-2.02971																		FBgn0000370	Crc	2.3723
					FBgn0263258	chas	1.68165																		FBgn0004396	CrebA	1.61127
					FBgn0014141	cher	3.01565																		FBgn0025680	Cry	4.02094
					FBgn0015371	chn	-1.14636																		FBgn0030521	CtsB1	2.57247
					FBgn0267435	chp	2.79012																		FBgn0000404	CycA	-4.76161
					FBgn0040232	cmet	-5.91381																		FBgn0039858	CycG	1.08803
					FBgn0010105	comm	-1.79024																		FBgn0004432	Cyp1	1.2883
					FBgn0041160	comm2	2.15835																		FBgn0038681	Cyp12a4	1.56685
					FBgn0259236	comm3	-5.18924																		FBgn0038680	Cyp12a5	4.40757
					FBgn0010434	cora	1.82841																		FBgn0010383	Cyp18a1	3.53961
					FBgn0265935	coro	2.28993																		FBgn0028940	Cyp28a5	3.42373
					FBgn0259685	crb	1.91692																		FBgn0031689	Cyp28d1	2.82265
					FBgn0036198	crim	-6.70684																		FBgn0036778	Cyp312a1	3.24156
					FBgn0000394	cv	2.97794																		FBgn0033524	Cyp49a1	-2.091
					FBgn0265048	cv-d	2.38346																		FBgn0031693	Cyp4ac1	-1.9948
					FBgn0039286	dan	-3.46935																		FBgn0031695	Cyp4ac3	-3.12671
					FBgn0039283	danr	-3.48996																		FBgn0031925	Cyp4d21	2.54519
					FBgn0010316	dap	2.27437																		FBgn0030304	Cyp4g15	1.66398
					FBgn0086898	dgo	3.31611																		FBgn0015037	Cyp4p1	1.17679
					FBgn0030891	dik	-2.48981																		FBgn0033395	Cyp4p2	-1.69899
					FBgn0023091	dimm	2.78044																		FBgn0033397	Cyp4p3	-2.52162
					FBgn0000459	disco	1.60667																		FBgn0030615	Cyp4s3	-3.4314
					FBgn0024510	dlt	-1.86221																		FBgn0033980	Cyp6a20	2.13895
					FBgn0030477	dmrt11E	-5.52379																		FBgn0033978	Cyp6a23	4.29449
					FBgn0043903	dome	1.42606																		FBgn0038194	Cyp6d5	1.91459
					FBab0000112	dp	1.84723																		FBgn0041336	Cyp6t2Psi	-2.02724
					FBgn0053202	dpr11	-1.07973																		FBgn0033065	Cyp6w1	3.31945
					FBgn0037993	dpr15	-2.08502																		FBgn0015039	Cyp9b2	2.46426
					FBgn0032233	dpr19	-1.28497																		FBgn0033775	Cyp9h1	3.38691
					FBgn0040823	dpr6	-1.89721																		FBgn0004629	Cys	3.23999
					FBgn0053481	dpr7	-1.90692																		FBgn0264294	Cyt-b5	2.30076
					FBgn0260006	drd	2.49133																		FBgn0000406	Cyt-b5-r	2.76184
					FBgn0024244	drm	3.62434																		FBgn0284248	Cyt-c-p	1.62045
					FBgn0284247	ds	1.6503																		FBgn0263600	DNApol-delta	-5.06357
					FBgn0000527	e	3.33424																		FBgn0034136	Dat	2.53596
					FBgn0001942	eIF-4a	1.09213																		FBgn0010387	Dbi	4.09338
					FBgn0285952	eIF-5A	1.69969																		FBgn0024804	Dbp80	-2.03358
					FBgn0034258	eIF3-S8	1.84256																		FBgn0053531	Ddr	-1.66552
					FBgn0034237	eIF3-S9	3.07889																		FBgn0086687	Desat1	1.87752
					FBgn0037573	eIF4AIII	-2.73419																		FBgn0000439	Dfd	1.91504
					FBgn0000542	ec	1.32474																		FBgn0027836	Dgp-1	-2.42609
					FBgn0000451	ect	2.23202																		FBgn0012344	Dh44	4.32482
					FBgn0000562	egl	1.30406																		FBgn0033744	Dh44-R2	-1.46192
					FBgn0260400	elav	-1.4202																		FBgn0261797	Dhc64C	1.92153
					FBgn0020497	emb	1.7127																		FBgn0004087	Dhfr	-4.82598
					FBgn0010435	emp	3.66826																		FBgn0036808	Dic4	5.11782
					FBgn0031375	erm	-3.83871																		FBgn0000454	Dip-B	3.3615
					FBgn0001981	esg	3.47795																		FBgn0000157	Dll	-1.77364
					FBgn0004583	ex	2.09436																		FBgn0263106	DnaJ-1	1.16698
					FBgn0000615	exu	4.0708																		FBgn0027835	Dp1	2.452
					FBgn0037913	fabp	2.17714																		FBgn0033188	Drat	1.42776
					FBgn0033859	fand	1.92551																		FBgn0020381	Dredd	1.75608
					FBgn0026721	fat-spondin	2.99379																		FBgn0033791	Drl-2	-1.02512
					FBgn0011205	fbl	-1.86999																		FBgn0033159	Dscam1	-1.01443
					FBgn0032820	fbp	4.71276																		FBgn0261046	Dscam3	-2.2495
					FBgn0032773	fon	2.02252																		FBgn0263219	Dscam4	-1.26596
					FBgn0053556	form3	1.76791																		FBgn0278608	Dsp1	-1.35013
					FBgn0011592	fra	-1.13035																		FBgn0283531	Duox	2.58272
					FBgn0051774	fred	-1.39011																		FBgn0020445	E23	1.81696
					FBgn0001075	ft	2.03334																		FBgn0024371	E2f2	-2.25037
					FBgn0001078	ftz-f1	-1.345																		FBgn0000559	EF2	2.33226
					FBgn0001083	fw	3.00379																		FBgn0026439	Eaat1	1.91208
					FBgn0027343	fz3	-4.26687																		FBgn0000546	EcR	-1.01866
					FBgn0005695	gcl	2.14601																		FBgn0262579	Ect4	1.71244
					FBgn0023081	gek	1.25257																		FBgn0284245	Ef1alpha48D	2.6172
					FBgn0050011	gem	1.66949																		FBgn0028737	Ef1beta	2.98746
					FBgn0027657	glob1	1.68938																		FBgn0029176	Ef1gamma	2.49628
					FBgn0052227	gogo	-2.20814																		FBgn0005640	Eip63E	-1.21922
					FBgn0024232	gprs	-1.12265																		FBgn0004865	Eip78C	-1.40091
					FBgn0001133	grau	-3.66094																		FBgn0039066	EloA	-1.65784
					FBgn0259211	grh	2.16835																		FBgn0023212	EloB	2.1125
					FBgn0286567	gry	1.63608																		FBgn0028515	EndoGI	2.05008
					FBgn0026238	gus	-1.3117																		FBgn0030597	Eo	-2.7413
					FBgn0045852	ham	-2.36739																		FBgn0040324	Ephrin	-1.33705
					FBgn0038842	hdly	-2.61657																		FBgn0000592	Est-6	4.72594
					FBgn0040211	hgo	4.04466																		FBgn0266758	Esyt2	1.42396
					FBgn0041150	hoe1	1.39442																		FBgn0286783	Etf-QO	1.83424
					FBgn0010389	htl	2.41261																		FBgn0013954	FK506-bp2	1.52753
					FBgn0041147	ida	-5.86562																		FBgn0005632	Faf	1.57877
					FBgn0001250	if	2.88588																		FBgn0000639	Fbp1	3.26712
					FBgn0004784	inaC	2.08607																		FBgn0015222	Fer1HCH	1.93949
					FBgn0001263	inaD	2.46947																		FBgn0015221	Fer2LCH	1.19595
					FBgn0260812	inaF-D	-3.38702																		FBgn0263278	Fic	-2.55736
					FBgn0028371	jbug	2.47478																		FBgn0085397	Fili	-1.17598
					FBgn0031652	jet	-2.86755																		FBgn0033079	Fmo-2	3.19697
					FBgn0261955	kdn	1.90326																		FBgn0262477	FoxP	-1.51064
					FBgn0011236	ken	3.14996																		FBgn0038149	GILT1	2.49835
					FBgn0028369	kirre	-2.03562																		FBgn0039099	GILT2	4.55905
					FBgn0001311	kkv	3.63855																		FBgn0040322	GNBP2	3.51312
					FBgn0017590	klg	-1.65884																		FBgn0040321	GNBP3	2.97781
					FBgn0001320	kni	5.2313																		FBgn0027790	GV1	2.81745
					FBgn0001323	knrl	3.05044																		FBgn0001091	Gapdh1	2.10463
					FBgn0015402	ksr	-2.29461																		FBgn0001092	Gapdh2	1.62125
					FBgn0004167	kst	2.80078																		FBgn0029667	Gas8	-4.8991
					FBgn0015721	ktub	-2.39974																		FBgn0026077	Gasp	2.9021
					FBgn0027291	l(1)G0156	2.06215																		FBgn0004623	Gbeta76C	1.84825
					FBgn0028325	l(1)G0334	2.19096																		FBgn0034199	Gbp	3.34047
					FBgn0010651	l(2)08717	2.69475																		FBgn0036428	Gbs-70E	1.32684
					FBgn0267365	l(2)SH0834	-2.39053																		FBgn0036862	Gbs-76A	-1.26701
					FBgn0002121	l(2)gl	1.81388																		FBgn0019990	Gcn2	1.65849
					FBgn0002440	l(3)mbn	3.26239																		FBgn0010225	Gel	2.78387
					FBgn0011476	l(3)neo43	-5.07156																		FBgn0262869	Gfrl	-1.6067
					FBgn0286203	laccase2	2.0136																		FBgn0004921	Ggamma1	1.54893
					FBgn0016031	lama	3.04309																		FBgn0035266	Gk	2.21784
					FBgn0002543	lea	-1.98688																		FBgn0038934	Gld2	-1.84707
					FBgn0040102	lectin-24Db	-6.86304																		FBgn0001114	Glt	3.33115
					FBgn0040099	lectin-28C	-5.8177																		FBgn0004619	GluRIA	-1.40197
					FBgn0053532	lectin-37Da	-3.80665																		FBgn0264574	Glut1	-1.04105
					FBgn0033855	link	-7.28193																		FBgn0004507	GlyP	1.96179
					FBgn0061492	loj	3.29609																		FBgn0266064	GlyS	1.07554
					FBgn0002566	lt	-1.72199																		FBgn0001125	Got2	2.03018
					FBgn0268063	ltl	2.46473																		FBgn0013272	Gp150	2.87916
					FBgn0029688	lva	1.31212																		FBgn0063368	Gpb5	-2.96135
					FBgn0038488	m-cup	-1.9018																		FBgn0260798	Gprk1	-2.35398
					FBgn0019985	mGluR	-1.46071																		FBgn0041242	Gr47a	-2.48469
					FBgn0040389	mRpL14	-5.11454																		FBgn0052693	Gr9a	-6.66444
					FBgn0026741	mRpL18	-6.9466																		FBgn0001145	Gs2	2.81696
					FBgn0036335	mRpL20	-5.58089																		FBgn0001149	GstD1	2.34221
					FBgn0036462	mRpL39	-5.83178																		FBgn0038020	GstD9	4.89303
					FBgn0038678	mRpL55	-5.99186																		FBgn0030484	GstT4	2.63713
					FBgn0051450	mRpS18A	-5.60157																		FBgn0037696	GstZ1	-2.31823
					FBgn0037529	mRpS9	-3.2364																		FBgn0025592	Gyk	2.01361
					FBgn0262169	magu	2.3849																		FBgn0001170	H2.0	5.67698
					FBgn0034641	mahj	1.26981																		FBgn0026428	HDAC6	1.71418
					FBgn0265487	mbl	-1.1355																		FBgn0031107	HERC2	2.17926
					FBgn0002709	mei-218	-6.40881																		FBgn0040318	HGTX	2.69164
					FBgn0002707	mei-9	-4.98674																		FBgn0046706	Haspin	-2.7381
					FBgn0023001	melt	2.46519																		FBgn0051119	HdacX	-2.86431
					FBgn0004228	mex1	5.21328																		FBgn0033686	Hen1	-6.15678
					FBgn0260745	mfas	1.74798																		FBgn0041629	Hexo2	2.66699
					FBgn0035473	mge	1.42431																		FBgn0013981	His4r	1.72593
					FBgn0261260	mgl	1.11242																		FBgn0029167	Hml	2.74286
					FBgn0259749	mmy	2.16135																		FBgn0015737	Hmu	1.82831
					FBgn0051217	modSP	4.56104																		FBgn0001208	Hn	2.40763
					FBgn0033773	mos	-5.40491																		FBgn0037382	Hpr1	-2.51581
					FBgn0261109	mrn	-6.88382																		FBgn0001216	Hsc70-1	2.80419
					FBgn0036868	ms(3)76Ba	-1.87139																		FBgn0266599	Hsc70-4	2.11306
					FBgn0002775	msl-3	-2.5487																		FBgn0001226	Hsp27	-2.45934
					FBgn0020269	mspo	-1.66226																		FBgn0013278	Hsp70Bb	-2.9054
					FBgn0013679	mt:ND1	2.23732																		FBgn0001233	Hsp83	1.42454
					FBgn0013686	mt:lrRNA	8.43651																		FBgn0001234	Hsromega	-2.62156
					FBgn0013688	mt:srRNA	3.27912																		FBgn0038233	HtrA2	-5.55204
					FBgn0037778	mtTFB2	-6.21887																		FBgn0028374	Hug	-4.08296
					FBgn0035132	mthl10	2.12936																		FBgn0026417	Hus1-like	-2.89107
					FBgn0045442	mthl12	25.0811																		FBgn0261624	I-3	-3.63198
					FBgn0050018	mthl13	-2.15842																		FBgn0031294	IA-2	2.13057
					FBgn0052475	mthl8	-1.69857																		FBgn0067905	IM14	2.76952
					FBgn0002905	mus308	-7.30634																		FBgn0025583	IM2	2.88307
					FBgn0040347	mus81	-4.87991																		FBgn0040736	IM3	3.27433
					FBgn0264272	mwh	2.65796																		FBgn0035023	ITP	1.53886
					FBgn0015519	nAChRalpha3	-1.36566																		FBgn0038860	Ice2	-6.39578
					FBgn0266347	nAChRalpha4	-1.67845																		FBgn0020415	Idgf2	2.38577
					FBgn0032151	nAChRalpha6	-1.59392																		FBgn0020414	Idgf3	2.20835
					FBgn0034797	nahoda	3.18065																		FBgn0026415	Idgf4	3.51995
					FBgn0002922	nau	5.51025																		FBgn0044049	Ilp4	-6.71978
					FBgn0002930	nec	2.24808																		FBgn0036690	Ilp8	5.24135
					FBgn0028999	nerfin-1	-3.22385																		FBgn0039139	Ime4	-4.41467
					FBgn0002932	neur	-1.50847																		FBgn0001253	ImpE1	4.24842
					FBgn0002937	ninaB	1.98092																		FBgn0001254	ImpE2	4.51712
					FBgn0002938	ninaC	2.5231																		FBgn0001255	ImpE3	-2.91667
					FBgn0002940	ninaE	1.87055																		FBgn0001257	ImpL2	2.56196
					FBgn0026196	nop5	-2.10791																		FBgn0001258	ImpL3	-4.0799
					FBgn0262738	norpA	1.57703																		FBgn0036816	Indy	1.67816
					FBgn0015776	nrv1	1.83285																		FBgn0035462	IntS10	3.45637
					FBgn0015777	nrv2	1.90727																		FBgn0039459	IntS12	3.62953
					FBgn0002973	numb	-1.09077																		FBgn0086359	Invadolysin	1.41788
					FBgn0031097	obst-A	2.47257																		FBgn0027108	Inx2	1.0068
					FBgn0027600	obst-B	2.88127																		FBgn0030187	Ipod	-4.70516
					FBgn0002985	odd	5.1467																		FBgn0033515	Ir47a	-3.54237
					FBgn0004646	ogre	2.14177																		FBgn0265141	Ir47b	-3.53035
					FBgn0028996	onecut	-1.17244																		FBgn0033651	Ir48c	-4.62246
					FBgn0264389	opm	-3.51663																		FBgn0033997	Ir51a	-5.40137
					FBgn0003011	ort	-2.90059																		FBgn0050081	Ir51b	-5.53887
					FBgn0004839	otk	-2.86881																		FBgn0050125	Ir56a	-3.24811
					FBgn0015524	otp	-2.66996																		FBgn0259215	Ir93a	-5.87517
					FBgn0040087	p115	-6.04969																		FBgn0259194	Ir94e	-5.49738
					FBgn0039044	p53	-5.77084																		FBgn0038465	Irc	2.17766
					FBgn0265297	pAbp	1.67777																		FBgn0024957	Irp-1B	1.6868
					FBgn0264908	pHCl	-2.05947																		FBgn0010395	Itgbetanu	-3.98883
					FBgn0060296	pain	1.64078																		FBgn0259682	Jabba	2.38706
					FBgn0039861	pasha	-4.10644																		FBgn0040308	Jafrac2	3.35029
					FBgn0027601	pdgy	1.61568																		FBgn0028424	JhI-26	3.03487
					FBgn0004394	pdm2	-2.48719																		FBgn0010053	Jheh1	4.21065
					FBgn0020521	pio	2.28427																		FBgn0034405	Jheh2	2.87445
					FBgn0266581	pit	-2.6538																		FBgn0033494	KCNQ	-1.4658
					FBgn0034878	pita	-2.5174																		FBgn0035144	Kah	2.27859
					FBgn0086706	pix	2.02843																		FBgn0053182	Kdm4B	-1.59092
					FBgn0005626	ple	3.24491																		FBgn0028952	Kebab	-5.58358
					FBgn0011230	poe	1.42612																		FBgn0001308	Khc	1.14952
					FBgn0250871	pot	3.53095																		FBgn0038205	Kif19A	-5.82277
					FBgn0034965	ppk29	-2.76025																		FBgn0039925	Kif3C	-1.80196
					FBgn0003141	pr	2.13548																		FBgn0001325	Kr	-3.00196
					FBgn0028573	prc	3.32101																		FBgn0039688	Kul	1.19238
					FBgn0266178	pre-mod(mdg4)-B	-6.83655																		FBgn0267825	L	1.90889
					FBgn0035770	pst	3.05003																		FBgn0035610	LKR	1.40198
					FBgn0003892	ptc	2.25727																		FBgn0027611	LM408	2.54263
					FBgn0003159	ptr	1.59179																		FBgn0010238	Lac	1.7994
					FBgn0020385	pug	2.15156																		FBgn0002526	LanA	2.78679
					FBgn0053207	pxb	-1.52067																		FBgn0261800	LanB1	3.17959
					FBgn0035113	pyx	3.74798																		FBgn0267348	LanB2	3.01736
					FBgn0028622	qsm	3.12089																		FBgn0000464	Lar	-1.14835
					FBgn0243486	rdo	-1.34797																		FBgn0016650	Lgr1	1.87149
					FBgn0040074	retinin	2.12899																		FBgn0039354	Lgr3	-4.38113
					FBgn0261258	rgn	1.51713																		FBgn0033593	Listericin	4.31788
					FBgn0027376	rha	-3.72453																		FBgn0017581	Lk6	1.57902
					FBgn0003255	rk	-2.06032																		FBgn0263593	Lpin	1.28501
					FBgn0003256	rl	-1.44661																		FBgn0039114	Lsd-1	1.74716
					FBgn0267337	rn	-1.24124																		FBgn0030608	Lsd-2	2.02111
					FBgn0041097	robo3	-2.16638																		FBgn0002563	Lsp1beta	3.12101
					FBgn0087005	rtp	1.86113																		FBgn0038578	MED17	-4.53974
					FBgn0266019	rudhira	1.17576																		FBgn0040020	MED21	-1.07468
					FBgn0003300	run	-4.42913																		FBgn0035357	MEP-1	-1.84695
					FBgn0037672	sage	-5.58019																		FBgn0058263	MFS17	-2.18919
					FBgn0002306	sas	2.61471																		FBgn0267861	Maf1	-1.39487
					FBgn0033033	scaf	2.62373																		FBgn0050359	Mal-A5	2.63471
					FBgn0261872	scaf6	-1.5658																		FBgn0032381	Mal-B1	-3.04976
					FBgn0040918	schlank	1.34784																		FBgn0032382	Mal-B2	-1.30856
					FBgn0005590	scw	-2.57985																		FBgn0029870	Marf	1.12071
					FBgn0260653	serp	4.01518																		FBgn0032116	Mco1	2.39835
					FBgn0003360	sesB	1.52558																		FBgn0267488	Mcr	1.58261
					FBgn0003366	sev	3.55838																		FBgn0023549	Mct1	1.27937
					FBgn0003382	sha	5.01993																		FBgn0262782	Mdh1	2.7477
					FBgn0085387	shakB	-1.60012																		FBgn0262559	Mdh2	2.20809
					FBgn0003391	shg	1.23116																		FBgn0004512	Mdr49	2.40527
					FBgn0037643	skap	2.02666																		FBgn0004513	Mdr65	3.93032
					FBgn0005638	slbo	4.25357																		FBgn0002719	Men	1.73044
					FBgn0037203	slif	1.84734																		FBgn0086384	Mer	1.90971
					FBgn0038524	sll	2.94162																		FBgn0038294	Mf	2.44633
					FBgn0003429	slo	-1.23406																		FBgn0264695	Mhc	3.36386
					FBgn0035539	slow	2.67871																		FBgn0262519	Mi-2	1.29744
					FBgn0086906	sls	3.43353																		FBgn0036713	Mip	3.42428
					FBgn0082962	snoRNA:Psi28S-3385a	-4.35459																		FBgn0026061	Mipp1	1.93408
					FBgn0263470	snoRNA:Tudor-SN-a	2.86542																		FBgn0002772	Mlc1	3.5504
					FBgn0263481	snoRNA:lola-b	-2.39649																		FBgn0002773	Mlc2	4.06091
					FBgn0263482	snoRNA:lola-c	-4.76973																		FBgn0259209	Mlp60A	2.50081
					FBgn0004892	sob	5.81136																		FBgn0014863	Mlp84B	1.32047
					FBgn0003463	sog	2.03963																		FBgn0035049	Mmp1	3.21392
					FBgn0030774	spheroide	-2.17041																		FBgn0011661	Moe	2.04524
					FBgn0052383	sphinx1	-4.86094																		FBgn0002789	Mp20	4.29314
					FBgn0086362	spn-F	-3.4126																		FBgn0038662	Mpc1	1.74132
					FBgn0086917	spok	-4.07019																		FBgn0026409	Mpcp	1.57353
					FBgn0028683	spt4	-5.89855																		FBgn0263316	Mrp4	1.79733
					FBgn0003495	spz	1.99834																		FBgn0011581	Ms	1.94863
					FBgn0031959	spz3	3.83861																		FBgn0035331	MsR1	-1.59866
					FBgn0086370	sra	-1.66334																		FBgn0264002	MsR2	-2.77463
					FBgn0036248	ssp	-3.37602																		FBgn0261836	Msp300	1.1045
					FBgn0003517	sta	2.64614																		FBgn0015766	Msr-110	3.03622
					FBgn0086450	su(r)	3.61238																		FBgn0002868	MtnA	2.32995
					FBgn0033782	sug	3.4685																		FBgn0266369	Mtp	2.69612
					FBgn0086350	tef	-2.01269																		FBgn0028479	Mtpalpha	2.49225
					FBgn0045035	tefu	1.19881																		FBgn0052580	Muc14A	-2.09721
					FBgn0033921	tej	-4.78774																		FBgn0037260	Mur82C	-2.66685
					FBgn0031390	tho2	1.68587																		FBgn0033402	Myd88	1.44294
					FBgn0033652	ths	-1.42277																		FBgn0263705	Myo10A	1.39964
					FBgn0000964	tj	-1.7711																		FBgn0004647	N	1.74014
					FBgn0265356	tn	2.10685																		FBgn0010488	NAT1	1.35888
					FBgn0039257	tnc	2.94461																		FBgn0019957	ND42	2.38214
					FBgn0015600	toc	-1.07851																		FBgn0017566	ND75	2.2175
					FBgn0004885	tok	1.63231																		FBgn0024947	NTPase	1.39825
					FBgn0019650	toy	-1.0826																		FBgn0085434	NaCP60E	-1.07941
					FBgn0003741	tra	-3.74253																		FBgn0086904	Nacalpha	1.88636
					FBgn0003861	trp	1.9866																		FBgn0015268	Nap1	2.83912
					FBgn0033378	tsu	-5.51938																		FBgn0039125	Ndc1	-5.62492
					FBgn0003891	tud	1.41042																		FBgn0017430	Nelf-E	-3.47445
					FBgn0031879	uif	3.05781																		FBgn0038818	Nep4	3.00849
					FBgn0025726	unc-13	-1.07223																		FBgn0037447	Neurochondrin	4.26804
					FBgn0004395	unk	-1.39859																		FBgn0035993	Nf-YA	-2.27901
					FBgn0004169	up	3.24679																		FBgn0040297	Nhe2	-1.40529
					FBgn0261341	verm	3.47189																		FBgn0036101	NijA	3.72351
					FBgn0003975	vg	-2.69674																		FBgn0031866	Nlg2	-1.34501
					FBgn0043841	vir-1	2.83818																		FBgn0013305	Nmda1	1.67864
					FBgn0016075	vkg	3.19279																		FBgn0010399	Nmdar1	-1.65434
					FBgn0045823	vsg	1.50629																		FBgn0028473	Non1	2.03453
					FBgn0039620	wat	2.34274																		FBgn0035370	Non2	-3.9123
					FBgn0034718	wdp	2.53836																		FBgn0037137	Nopp140	2.73281
					FBgn0039003	wfs1	-5.37363																		FBgn0085436	Not1	1.43494
					FBgn0030941	wgn	1.92619																		FBgn0024320	Npc1a	1.05337
					FBgn0051665	wry	-1.70011																		FBgn0038198	Npc2b	4.07257
					FBgn0016078	wun	-1.47566																		FBgn0039800	Npc2g	2.85222
					FBgn0283471	wupA	2.83261																		FBgn0287423	Nplp2	3.1922
					FBgn0041711	yellow-e	4.01248																		FBgn0042201	Nplp3	3.59486
					FBgn0038105	yellow-f2	3.59504																		FBgn0020391	Nrk	-2.31032
					FBgn0040064	yip2	4.36288																		FBgn0031848	Nse1	-6.22561
					FBgn0052311	zormin	2.48042																		FBgn0032251	Nse4	-4.12315
					FBgn0036985	zye	4.78288																		FBgn0016687	Nurf-38	1.40277
																									FBgn0263232	Nxf3	-2.25129
																									FBgn0011280	Obp19d	2.41094
																									FBgn0037589	Obp85a	-2.62317
																									FBgn0038980	Octbeta1R	-1.1416
																									FBgn0250910	Octbeta3R	-2.30389
																									FBgn0013307	Odc1	4.23601
																									FBgn0032651	Oli	-3.53468
[truncated: 761 more rows]
